# Supplementary material for: eRNA profiling uncovers the enhancer landscape of oesophageal adenocarcinoma and reveals new deregulated pathways
Source: eLife. 2023 Feb 20;12:e80840. doi: 10.7554/eLife.80840 (PMC9998086; doi:10.7554/eLife.80840)
Supplement: Supplementary file 1. [file elife-80840-supp1.xlsx]

## Sheet: Legend
Table S1
All expressed eRNAs (FPM ≥ 1.5, raw counts ≥ 3) identified using the pipeline
Column H: Differentially expressed eRNAs (DEE) in OAC
Column I: eRNAs shared in OAC and BO
Column J: Differentially expressed eRNAs (DEE) in BO
Column K: All OAC eRNA regions with KLF5 motif
Column L: All OAC eRNA regions with AP1 motif

## Sheet: All eRNAs
#PeakID	Chr	Start	End	Distance to TSS	Gene Name	Gene Name2	OAC_DEE	OAC/BO_shared	BO_DEE	KLF5_motif	AP1_motif
chr1_267760_268261	chr1	267760	268261	-61413	FAM138D	FAM138D	TRUE	.	.	.	.
chr1_9101509_9102010	chr1	9101509	9102010	27411	GPR157	GPR157	TRUE	.	.	.	.
chr1_11909317_11909818	chr1	11909317	11909818	1413	RNU5E-1	RNU5E-1	TRUE	.	.	.	.
chr1_25875274_25875822	chr1	25875274	25875822	-4295	PAQR7	PAQR7	TRUE	.	.	TRUE	.
chr1_31444652_31445368	chr1	31444652	31445368	31197	SERINC2	SERINC2	TRUE	.	.	.	TRUE
chr1_31471459_31471960	chr1	31471459	31471960	-28376	LINC01225	LDC1P	TRUE	.	.	.	TRUE
chr1_43119974_43120475	chr1	43119974	43120475	-27699	FAM183A	FAM183A	TRUE	.	.	TRUE	.
chr1_56425101_56425602	chr1	56425101	56425602	10388	LINC01767	LINC01767	TRUE	.	.	.	TRUE
chr1_56456753_56457254	chr1	56456753	56457254	42040	LINC01767	LINC01767	TRUE	.	.	.	TRUE
chr1_56477376_56477877	chr1	56477376	56477877	62663	LINC01767	LINC01767	TRUE	.	.	TRUE	.
chr1_65254162_65254916	chr1	65254162	65254916	-10155	DNAJC6	DNAJC6	TRUE	.	.	TRUE	.
chr1_110356342_110356843	chr1	110356342	110356843	17269	RBM15	RBM15	TRUE	.	.	.	TRUE
chr1_116489263_116489764	chr1	116489263	116489764	-10687	LINC01762	LINC01762	TRUE	.	.	.	TRUE
chr1_116494689_116495190	chr1	116494689	116495190	-16113	LINC01762	LINC01762	TRUE	.	.	.	TRUE
chr1_117842773_117843274	chr1	117842773	117843274	86656	GDAP2	GDAP2	TRUE	.	.	TRUE	TRUE
chr1_117857367_117857905	chr1	117857367	117857905	72043	GDAP2	GDAP2	TRUE	.	.	.	.
chr1_119027716_119028245	chr1	119027716	119028245	-19425	WARS2-IT1	WARS2-IT1	TRUE	.	.	TRUE	TRUE
chr1_119603608_119604109	chr1	119603608	119604109	-4567	LINC00622	LINC00622	TRUE	.	.	.	TRUE
chr1_119613702_119614203	chr1	119613702	119614203	-14661	LINC00622	LINC00622	TRUE	.	.	TRUE	TRUE
chr1_120340791_120341292	chr1	120340791	120341292	-73986	NBPF8	NBPF8	TRUE	.	.	.	.
chr1_125179806_125180426	chr1	125179806	125180426	3661004	EMBP1	EMBP1	TRUE	.	.	.	.
chr1_145156863_145157364	chr1	145156863	145157364	10375	LOC100996741	LOC100996741	TRUE	.	.	.	.
chr1_145287321_145287822	chr1	145287321	145287822	6455	RNVU1-14	RNVU1-14	TRUE	.	.	.	.
chr1_145465251_145465819	chr1	145465251	145465819	-59757	NBPF20	NBPF20	TRUE	.	.	TRUE	.
chr1_145740121_145740622	chr1	145740121	145740622	20925	CD160	CD160	TRUE	.	.	.	TRUE
chr1_146387060_146387561	chr1	146387060	146387561	10503	RNU1-4	RNU1-4	TRUE	.	.	TRUE	.
chr1_146409574_146410075	chr1	146409574	146410075	33017	RNU1-4	RNU1-4	TRUE	.	.	TRUE	.
chr1_147627403_147627904	chr1	147627403	147627904	42859	ACP6	ACP6	TRUE	.	.	.	.
chr1_147641933_147642434	chr1	147641933	147642434	28329	ACP6	ACP6	TRUE	.	.	.	.
chr1_148263401_148263902	chr1	148263401	148263902	-16580	LOC101927468	LOC101927468	TRUE	.	.	.	.
chr1_148290941_148291442	chr1	148290941	148291442	43363	MIR5087	MIR5087	TRUE	.	.	TRUE	TRUE
chr1_148528892_148529393	chr1	148528892	148529393	-45857	PPIAL4G	PPIAL4G	TRUE	.	.	TRUE	.
chr1_149174661_149175162	chr1	149174661	149175162	-92600	NBPF9	NBPF9	TRUE	.	.	TRUE	.
chr1_149190775_149191276	chr1	149190775	149191276	-108714	NBPF9	NBPF9	TRUE	.	.	.	TRUE
chr1_149848599_149849100	chr1	149848599	149849100	1924	HIST2H2BC	HIST2H2BC	TRUE	.	.	.	TRUE
chr1_150061466_150061967	chr1	150061466	150061967	-5577	VPS45	VPS45	TRUE	.	.	.	TRUE
chr1_150596202_150596703	chr1	150596202	150596703	-16714	MCL1	MCL1	TRUE	.	.	TRUE	.
chr1_150613484_150613985	chr1	150613484	150613985	15399	ENSA	ENSA	TRUE	.	.	.	TRUE
chr1_153312629_153313130	chr1	153312629	153313130	-2161	PGLYRP3	PGLYRP3	TRUE	.	.	TRUE	.
chr1_155637355_155637856	chr1	155637355	155637856	27417	MSTO2P	MSTO2P	TRUE	.	.	TRUE	.
chr1_155645551_155646052	chr1	155645551	155646052	33454	SCARNA26A	SCARNA26A	TRUE	.	.	.	TRUE
chr1_161409483_161409984	chr1	161409483	161409984	-41850	CFAP126	CFAP126	TRUE	.	.	.	TRUE
chr1_161427767_161428268	chr1	161427767	161428268	-60134	CFAP126	CFAP126	TRUE	.	.	.	.
chr1_161440090_161440680	chr1	161440090	161440680	-65030	FCGR2A	FCGR2A	TRUE	.	.	.	.
chr1_161530667_161531225	chr1	161530667	161531225	6406	HSPA6	HSPA6	TRUE	.	.	TRUE	TRUE
chr1_161612267_161612905	chr1	161612267	161612905	6527	HSPA7	HSPA7	TRUE	.	.	TRUE	.
chr1_163645549_163646050	chr1	163645549	163646050	-222608	LOC100422212	LOC100422212	TRUE	.	.	TRUE	.
chr1_165914123_165914624	chr1	165914123	165914624	6452	MIR3658	MIR3658	TRUE	.	.	.	.
chr1_165915400_165916079	chr1	165915400	165916079	7818	MIR3658	MIR3658	TRUE	.	.	TRUE	.
chr1_165924595_165925181	chr1	165924595	165925181	16967	MIR3658	MIR3658	TRUE	.	.	.	.
chr1_168260323_168260824	chr1	168260323	168260824	-13143	ANKRD36BP1	ANKRD36BP1	TRUE	.	.	.	.
chr1_192489707_192490235	chr1	192489707	192490235	-85756	RGS1	RGS1	TRUE	.	.	.	TRUE
chr1_192516760_192517269	chr1	192516760	192517269	-58713	RGS1	RGS1	TRUE	.	.	.	TRUE
chr1_192530220_192530721	chr1	192530220	192530721	-45257	RGS1	RGS1	TRUE	.	.	.	TRUE
chr1_192564085_192564658	chr1	192564085	192564658	-11356	RGS1	RGS1	TRUE	.	.	.	.
chr1_192739397_192739968	chr1	192739397	192739968	23354	MIR4426	MIR4426	TRUE	.	.	.	.
chr1_192974629_192975130	chr1	192974629	192975130	-26622	LINC01032	LINC01032	TRUE	.	.	.	TRUE
chr1_192998498_192998999	chr1	192998498	192998999	-50491	LINC01032	LINC01032	TRUE	.	.	.	.
chr1_193007865_193008403	chr1	193007865	193008403	49281	SCARNA18B	SCARNA18B	TRUE	.	.	.	.
chr1_193009438_193009939	chr1	193009438	193009939	47727	SCARNA18B	SCARNA18B	TRUE	.	.	.	.
chr1_193259602_193260176	chr1	193259602	193260176	-44856	LINC01031	LINC01031	TRUE	.	.	TRUE	.
chr1_197782013_197782526	chr1	197782013	197782526	-6776	DENND1B	DENND1B	TRUE	.	.	TRUE	TRUE
chr1_201538818_201539319	chr1	201538818	201539319	19164	RPS10P7	RPS10P7	TRUE	.	.	TRUE	.
chr1_201559602_201560114	chr1	201559602	201560114	39954	RPS10P7	RPS10P7	TRUE	.	.	TRUE	.
chr1_201632518_201633019	chr1	201632518	201633019	-15554	NAV1	NAV1	TRUE	.	.	TRUE	.
chr1_202043216_202043717	chr1	202043216	202043717	32904	ELF3	ELF3	TRUE	.	.	.	.
chr1_204379174_204379675	chr1	204379174	204379675	-9705	LINC00628	LINC00628	TRUE	.	.	.	TRUE
chr1_204390760_204391261	chr1	204390760	204391261	20807	PPP1R15B	PPP1R15B	TRUE	.	.	.	.
chr1_204578839_204579340	chr1	204578839	204579340	62710	MDM4	MDM4	TRUE	.	.	TRUE	.
chr1_205711042_205711543	chr1	205711042	205711543	-30790	SLC45A3	SLC45A3	TRUE	.	.	.	.
chr1_206737003_206737504	chr1	206737003	206737504	35241	IL10	IL10	TRUE	.	.	TRUE	.
chr1_206739424_206739925	chr1	206739424	206739925	32820	IL10	IL10	TRUE	.	.	.	.
chr1_212721406_212721940	chr1	212721406	212721940	-21688	BATF3	BATF3	TRUE	.	.	TRUE	TRUE
chr1_219228997_219229498	chr1	219228997	219229498	54278	LYPLAL1	LYPLAL1	TRUE	.	.	TRUE	.
chr1_219257732_219258233	chr1	219257732	219258233	83013	LYPLAL1	LYPLAL1	TRUE	.	.	TRUE	.
chr1_219271417_219271918	chr1	219271417	219271918	96698	LYPLAL1	LYPLAL1	TRUE	.	.	.	TRUE
chr1_227542124_227542983	chr1	227542124	227542983	-20966	ZNF678	ZNF678	TRUE	.	.	TRUE	.
chr1_229661197_229661702	chr1	229661197	229661702	35233	URB2	URB2	TRUE	.	.	.	TRUE
chr1_231357757_231358299	chr1	231357757	231358299	20092	SPRTN	SPRTN	TRUE	.	.	.	TRUE
chr1_231521909_231522410	chr1	231521909	231522410	-6494	TSNAX-DISC1	TSNAX-DISC1	TRUE	.	.	.	.
chr1_234356611_234357209	chr1	234356611	234357209	16493	LOC101927765	COA6-AS1	TRUE	.	.	.	.
chr1_234817235_234817820	chr1	234817235	234817820	-57471	PP2672	PP2672	TRUE	.	.	TRUE	.
chr1_234955136_234955637	chr1	234955136	234955637	8613	LOC101927851	LOC101927851	TRUE	.	.	.	.
chr1_235060720_235061221	chr1	235060720	235061221	8848	LINC01348	LINC01348	TRUE	.	.	TRUE	.
chr1_235062371_235062907	chr1	235062371	235062907	7179	LINC01348	LINC01348	TRUE	.	.	TRUE	TRUE
chr1_235104166_235104937	chr1	235104166	235104937	23386	SNORA14B	SNORA14B	TRUE	.	.	.	.
chr1_244391730_244392243	chr1	244391730	244392243	39351	C1orf100	C1orf100	TRUE	.	.	TRUE	TRUE
chr10_984271_984772	chr10	984271	984772	-3888	GTPBP4	GTPBP4	TRUE	.	.	.	.
chr10_3809999_3810547	chr10	3809999	3810547	-23677	LOC105376365	LINC02639	TRUE	.	.	TRUE	TRUE
chr10_4849546_4850076	chr10	4849546	4850076	23634	AKR1E2	AKR1E2	TRUE	.	.	.	.
chr10_4851803_4852304	chr10	4851803	4852304	25876	AKR1E2	AKR1E2	TRUE	.	.	.	TRUE
chr10_4867750_4868251	chr10	4867750	4868251	41823	AKR1E2	AKR1E2	TRUE	.	.	.	TRUE
chr10_4941439_4941940	chr10	4941439	4941940	-21573	AKR1C1	AKR1C1	TRUE	.	.	TRUE	TRUE
chr10_5488476_5489246	chr10	5488476	5489246	10709	CALML5	CALML5	TRUE	.	.	TRUE	TRUE
chr10_6239134_6239635	chr10	6239134	6239635	36507	PFKFB3	PFKFB3	TRUE	.	.	.	TRUE
chr10_6255553_6256054	chr10	6255553	6256054	52926	PFKFB3	PFKFB3	TRUE	.	.	.	.
chr10_6314518_6315390	chr10	6314518	6315390	-11590	LOC399715	LINC02649	TRUE	.	.	.	TRUE
chr10_6343530_6344031	chr10	6343530	6344031	-6536	LOC399716	LINC02656	TRUE	.	.	TRUE	.
chr10_47991681_47992182	chr10	47991681	47992182	7860	FAM25C	FAM25C	TRUE	.	.	TRUE	.
chr10_101708029_101708530	chr10	101708029	101708530	-12984	FBXW4	FBXW4	TRUE	.	.	.	.
chr10_101709922_101710423	chr10	101709922	101710423	-14877	FBXW4	FBXW4	TRUE	.	.	.	.
chr10_101716730_101717231	chr10	101716730	101717231	-21685	FBXW4	FBXW4	TRUE	.	.	.	TRUE
chr10_101725820_101726399	chr10	101725820	101726399	-30814	FBXW4	FBXW4	TRUE	.	.	TRUE	.
chr10_101729753_101730254	chr10	101729753	101730254	-34708	FBXW4	FBXW4	TRUE	.	.	TRUE	.
chr10_102169349_102170011	chr10	102169349	102170011	17504	NOLC1	NOLC1	TRUE	.	.	.	.
chr10_110522421_110523047	chr10	110522421	110523047	24867	DUSP5	DUSP5	TRUE	.	.	TRUE	.
chr10_112832541_112833042	chr10	112832541	112833042	9295	LOC103344931	LOC103344931	TRUE	.	.	.	TRUE
chr10_112842916_112843417	chr10	112842916	112843417	19670	LOC103344931	LOC103344931	TRUE	.	.	.	.
chr10_112851535_112852036	chr10	112851535	112852036	28289	LOC103344931	LOC103344931	TRUE	.	.	TRUE	.
chr10_122648764_122649265	chr10	122648764	122649265	50811	C10orf120	C10orf120	TRUE	.	.	.	.
chr10_123170937_123171438	chr10	123170937	123171438	16943	BUB3	BUB3	TRUE	.	.	TRUE	.
chr10_123995545_123996182	chr10	123995545	123996182	96561	CHST15	CHST15	TRUE	.	.	TRUE	.
chr10_124746970_124747471	chr10	124746970	124747471	-2859	FAM53B	FAM53B	TRUE	.	.	TRUE	.
chr10_126902078_126902579	chr10	126902078	126902579	-3081	DOCK1	DOCK1	TRUE	.	.	.	TRUE
chr10_133013433_133013934	chr10	133013433	133013934	48149	LINC01168	LINC01168	TRUE	.	.	TRUE	.
chr10_133497290_133497791	chr10	133497290	133497791	-29823	CYP2E1	CYP2E1	TRUE	.	.	TRUE	TRUE
chr10_133523564_133524065	chr10	133523564	133524065	-3549	CYP2E1	CYP2E1	TRUE	.	.	.	TRUE
chr11_201404_201905	chr11	201404	201905	4893	ODF3	ODF3	TRUE	.	.	TRUE	TRUE
chr11_2210985_2211585	chr11	2210985	2211585	38222	MIR4686	MIR4686	TRUE	.	.	.	.
chr11_2234986_2235487	chr11	2234986	2235487	35716	ASCL2	ASCL2	TRUE	.	.	TRUE	.
chr11_2262891_2263392	chr11	2262891	2263392	7811	ASCL2	ASCL2	TRUE	.	.	TRUE	.
chr11_6487460_6487961	chr11	6487460	6487961	-6231	ARFIP2	ARFIP2	TRUE	.	.	TRUE	.
chr11_6489184_6489762	chr11	6489184	6489762	-7823	DNHD1	DNHD1	TRUE	.	.	.	.
chr11_6703412_6703922	chr11	6703412	6703922	18212	GVINP1	GVINP1	TRUE	.	.	.	.
chr11_6705862_6706363	chr11	6705862	6706363	15767	GVINP1	GVINP1	TRUE	.	.	.	.
chr11_6711514_6712015	chr11	6711514	6712015	10115	GVINP1	GVINP1	TRUE	.	.	.	.
chr11_6746238_6746739	chr11	6746238	6746739	22469	OR2AG2	OR2AG2	TRUE	.	.	.	.
chr11_10302674_10303181	chr11	10302674	10303181	-2053	ADM	ADM	TRUE	.	.	TRUE	.
chr11_26849008_26849509	chr11	26849008	26849509	-127231	SLC5A12	SLC5A12	TRUE	.	.	TRUE	.
chr11_26965101_26965602	chr11	26965101	26965602	-28730	FIBIN	FIBIN	TRUE	.	.	TRUE	TRUE
chr11_35005216_35005797	chr11	35005216	35005797	63669	MIR1343	MIR1343	TRUE	.	.	.	.
chr11_36471540_36472041	chr11	36471540	36472041	38523	TRAF6	TRAF6	TRUE	.	.	.	.
chr11_43649700_43650425	chr11	43649700	43650425	-30531	HSD17B12	HSD17B12	TRUE	.	.	.	.
chr11_59545265_59545767	chr11	59545265	59545767	30603	OR4D9	OR4D9	TRUE	.	.	.	TRUE
chr11_63567110_63567763	chr11	63567110	63567763	-4053	HRASLS2	PLAAT2	TRUE	.	.	TRUE	TRUE
chr11_64181467_64181968	chr11	64181467	64181968	-3555	STIP1	STIP1	TRUE	.	.	.	TRUE
chr11_65371050_65371551	chr11	65371050	65371551	11086	SLC25A45	SLC25A45	TRUE	.	.	TRUE	.
chr11_65471996_65472507	chr11	65471996	65472507	-25487	MALAT1	MALAT1	TRUE	.	.	.	TRUE
chr11_69101319_69101820	chr11	69101319	69101820	18393	MIR3164	MIR3164	TRUE	.	.	.	.
chr11_69337086_69337587	chr11	69337086	69337587	43198	MYEOV	MYEOV	TRUE	.	.	TRUE	.
chr11_69966067_69966568	chr11	69966067	69966568	97607	LOC101928443	LINC02753	TRUE	.	.	TRUE	TRUE
chr11_69968617_69969118	chr11	69968617	69969118	95057	LOC101928443	LINC02753	TRUE	.	.	.	.
chr11_69972487_69972988	chr11	69972487	69972988	91187	LOC101928443	LINC02753	TRUE	.	.	TRUE	.
chr11_69993148_69993649	chr11	69993148	69993649	70526	LOC101928443	LINC02753	TRUE	.	.	TRUE	.
chr11_70208411_70208912	chr11	70208411	70208912	5498	FADD	FADD	TRUE	.	.	TRUE	.
chr11_71734339_71734840	chr11	71734339	71734840	-52922	FAM86C1	FAM86C1	TRUE	.	.	.	.
chr11_72831369_72831907	chr11	72831369	72831907	17232	ATG16L2	ATG16L2	TRUE	.	.	.	.
chr11_74658315_74658816	chr11	74658315	74658816	52802	CHRDL2	CHRDL2	TRUE	.	.	TRUE	.
chr11_76210458_76210959	chr11	76210458	76210959	-4178	WNT11	WNT11	TRUE	.	.	TRUE	.
chr11_76553678_76554179	chr11	76553678	76554179	108903	EMSY	EMSY	TRUE	.	.	.	.
chr11_83086980_83087481	chr11	83086980	83087481	15164	RAB30-AS1	RAB30-DT	TRUE	.	.	.	.
chr11_85830912_85831456	chr11	85830912	85831456	-20025	SYTL2	SYTL2	TRUE	.	.	.	TRUE
chr11_94120887_94121388	chr11	94120887	94121388	-7791	PANX1	PANX1	TRUE	.	.	.	TRUE
chr11_94183713_94184245	chr11	94183713	94184245	55051	PANX1	PANX1	TRUE	.	.	.	.
chr11_94237336_94238803	chr11	94237336	94238803	-67568	IZUMO1R	IZUMO1R	TRUE	.	.	TRUE	.
chr11_102746888_102747389	chr11	102746888	102747389	-22184	MMP8	MMP8	TRUE	.	.	TRUE	TRUE
chr11_106003077_106003578	chr11	106003077	106003578	18960	MSANTD4	MSANTD4	TRUE	.	.	TRUE	.
chr11_113663823_113664324	chr11	113663823	113664324	42300	TMPRSS5	TMPRSS5	TRUE	.	.	.	TRUE
chr11_113673994_113674495	chr11	113673994	113674495	32129	TMPRSS5	TMPRSS5	TRUE	.	.	.	.
chr11_125091414_125091915	chr11	125091414	125091915	20044	TMEM218	TMEM218	TRUE	.	.	.	TRUE
chr11_129225111_129225612	chr11	129225111	129225612	-33163	ARHGAP32	ARHGAP32	TRUE	.	.	.	TRUE
chr12_3041482_3041983	chr12	3041482	3041983	-35623	TSPAN9	TSPAN9	TRUE	.	.	.	.
chr12_6400014_6400515	chr12	6400014	6400515	16231	LTBR	LTBR	TRUE	.	.	TRUE	.
chr12_8251571_8252072	chr12	8251571	8252072	-8875	FAM86FP	FAM86FP	TRUE	.	.	.	.
chr12_12835279_12835834	chr12	12835279	12835834	22210	DDX47	DDX47	TRUE	.	.	.	TRUE
chr12_12836509_12837293	chr12	12836509	12837293	23555	DDX47	DDX47	TRUE	.	.	.	TRUE
chr12_12872312_12872816	chr12	12872312	12872816	-2913	RPL13AP20	RPL13AP20	TRUE	.	.	TRUE	.
chr12_16382695_16383422	chr12	16382695	16383422	29641	MGST1	MGST1	TRUE	.	.	TRUE	.
chr12_16385980_16386484	chr12	16385980	16386484	32815	MGST1	MGST1	TRUE	.	.	.	.
chr12_16493039_16493540	chr12	16493039	16493540	112090	LMO3	LMO3	TRUE	.	.	.	.
chr12_16505959_16506460	chr12	16505959	16506460	99170	LMO3	LMO3	TRUE	.	.	.	TRUE
chr12_16524198_16524809	chr12	16524198	16524809	80876	LMO3	LMO3	TRUE	.	.	.	TRUE
chr12_16531520_16532021	chr12	16531520	16532021	73609	LMO3	LMO3	TRUE	.	.	.	.
chr12_16535293_16535794	chr12	16535293	16535794	69836	LMO3	LMO3	TRUE	.	.	.	.
chr12_19620152_19620659	chr12	19620152	19620659	179824	AEBP2	AEBP2	TRUE	.	.	TRUE	.
chr12_28575804_28576305	chr12	28575804	28576305	-385316	LOC729291	LOC729291	TRUE	.	.	.	TRUE
chr12_46661285_46661819	chr12	46661285	46661819	164445	SLC38A4	SLC38A4	TRUE	.	.	.	TRUE
chr12_46664838_46665339	chr12	46664838	46665339	160909	SLC38A4	SLC38A4	TRUE	.	.	.	TRUE
chr12_47426908_47427409	chr12	47426908	47427409	12150	LINC02156	LINC02156	TRUE	.	.	TRUE	.
chr12_62618497_62618998	chr12	62618497	62618998	15061	MIRLET7I	MIRLET7I	TRUE	.	.	.	TRUE
chr12_66832951_66833452	chr12	66832951	66833452	-154056	GRIP1	GRIP1	TRUE	.	.	TRUE	.
chr12_66861083_66861584	chr12	66861083	66861584	-182188	GRIP1	GRIP1	TRUE	.	.	.	.
chr12_66901502_66902003	chr12	66901502	66902003	194532	LOC102724421	LOC102724421	TRUE	.	.	.	.
chr12_67019023_67019524	chr12	67019023	67019524	77011	LOC102724421	LOC102724421	TRUE	.	.	.	.
chr12_67034135_67034636	chr12	67034135	67034636	61899	LOC102724421	LOC102724421	TRUE	.	.	.	TRUE
chr12_67042549_67043050	chr12	67042549	67043050	53485	LOC102724421	LOC102724421	TRUE	.	.	TRUE	TRUE
chr12_67678635_67679136	chr12	67678635	67679136	30153	DYRK2	DYRK2	TRUE	.	.	TRUE	TRUE
chr12_67681104_67681605	chr12	67681104	67681605	32622	DYRK2	DYRK2	TRUE	.	.	.	TRUE
chr12_68028172_68028673	chr12	68028172	68028673	38977	IFNG-AS1	IFNG-AS1	TRUE	.	.	.	.
chr12_69284041_69284542	chr12	69284041	69284542	-11073	MIR1279	MIR1279	TRUE	.	.	.	TRUE
chr12_69330908_69331441	chr12	69330908	69331441	-17180	LYZ	LYZ	TRUE	.	.	.	.
chr12_69331857_69332358	chr12	69331857	69332358	-16247	LYZ	LYZ	TRUE	.	.	.	TRUE
chr12_69415702_69416203	chr12	69415702	69416203	-54397	FRS2	FRS2	TRUE	.	.	.	.
chr12_74337878_74338379	chr12	74337878	74338379	-45497	LOC100507377	LOC100507377	TRUE	.	.	.	TRUE
chr12_74393227_74393728	chr12	74393227	74393728	-100846	LOC100507377	LOC100507377	TRUE	.	.	.	TRUE
chr12_79524435_79524936	chr12	79524435	79524936	105428	MIR1252	MIR1252	TRUE	.	.	.	.
chr12_88466767_88467268	chr12	88466767	88467268	113456	KITLG	KITLG	TRUE	.	.	TRUE	.
chr12_89370369_89370870	chr12	89370369	89370870	-17760	DUSP6	DUSP6	TRUE	.	.	TRUE	.
chr12_89375574_89376111	chr12	89375574	89376111	-22983	DUSP6	DUSP6	TRUE	.	.	TRUE	TRUE
chr12_89400347_89400848	chr12	89400347	89400848	-47738	DUSP6	DUSP6	TRUE	.	.	.	TRUE
chr12_89417254_89417755	chr12	89417254	89417755	-64645	DUSP6	DUSP6	TRUE	.	.	.	TRUE
chr12_89542904_89543476	chr12	89542904	89543476	-16928	POC1B	POC1B	TRUE	.	.	.	TRUE
chr12_89544723_89545224	chr12	89544723	89545224	-18711	POC1B	POC1B	TRUE	.	.	.	.
chr12_89556905_89557406	chr12	89556905	89557406	-30893	POC1B	POC1B	TRUE	.	.	.	TRUE
chr12_89559700_89560201	chr12	89559700	89560201	-33688	POC1B	POC1B	TRUE	.	.	.	.
chr12_110224599_110225100	chr12	110224599	110225100	-56378	ATP2A2	ATP2A2	TRUE	.	.	.	TRUE
chr12_122725956_122726457	chr12	122725956	122726457	4376	HCAR1	HCAR1	TRUE	.	.	.	TRUE
chr13_19604202_19604703	chr13	19604202	19604703	17334	LINC00350	LINC00350	TRUE	.	.	.	.
chr13_19617299_19617800	chr13	19617299	19617800	-16099	MPHOSPH8	MPHOSPH8	TRUE	.	.	TRUE	.
chr13_19618867_19619368	chr13	19618867	19619368	-14531	MPHOSPH8	MPHOSPH8	TRUE	.	.	.	.
chr13_19622157_19622658	chr13	19622157	19622658	-11241	MPHOSPH8	MPHOSPH8	TRUE	.	.	.	.
chr13_22040750_22041251	chr13	22040750	22041251	-162840	LINC00424	LINC00424	TRUE	.	.	TRUE	.
chr13_27403909_27404534	chr13	27403909	27404534	-20323	GTF3A	GTF3A	TRUE	.	.	.	.
chr13_40554368_40554869	chr13	40554368	40554869	-73612	LINC00598	LINC00598	TRUE	.	.	.	.
chr13_45292107_45292608	chr13	45292107	45292608	44090	SNORA31B	SNORA31B	TRUE	.	.	TRUE	TRUE
chr13_47903976_47904477	chr13	47903976	47904477	28396	LINC00562	LINC00562	TRUE	.	.	.	TRUE
chr13_48066540_48067041	chr13	48066540	48067041	-10347	MED4-AS1	MED4-AS1	TRUE	.	.	TRUE	.
chr13_50865996_50866497	chr13	50865996	50866497	-22307	DLEU7	DLEU7	TRUE	.	.	.	.
chr13_53060783_53061288	chr13	53060783	53061288	32294	OLFM4	OLFM4	TRUE	.	.	.	.
chr13_53069163_53069664	chr13	53069163	53069664	40672	OLFM4	OLFM4	TRUE	.	.	.	.
chr13_54572260_54572761	chr13	54572260	54572761	-260462	MIR1297	MIR1297	TRUE	.	.	TRUE	TRUE
chr13_73618437_73618938	chr13	73618437	73618938	54443	LINC00392	LINC00392	TRUE	.	.	.	.
chr13_100083104_100083605	chr13	100083104	100083605	5589	LOC105370333	LOC105370333	TRUE	.	.	.	.
chr13_105969587_105970088	chr13	105969587	105970088	263007	LINC00343	LINC00343	TRUE	.	.	.	.
chr13_105972158_105972659	chr13	105972158	105972659	265578	LINC00343	LINC00343	TRUE	.	.	.	.
chr13_105979454_105979955	chr13	105979454	105979955	272874	LINC00343	LINC00343	TRUE	.	.	.	.
chr13_105991593_105992094	chr13	105991593	105992094	285013	LINC00343	LINC00343	TRUE	.	.	.	TRUE
chr13_105997721_105998222	chr13	105997721	105998222	291141	LINC00343	LINC00343	TRUE	.	.	TRUE	.
chr13_106004830_106005331	chr13	106004830	106005331	298250	LINC00343	LINC00343	TRUE	.	.	.	.
chr13_106038791_106039292	chr13	106038791	106039292	332211	LINC00343	LINC00343	TRUE	.	.	.	TRUE
chr13_106083654_106084276	chr13	106083654	106084276	-292598	LINC00460	LINC00460	TRUE	.	.	.	.
chr13_106090313_106090814	chr13	106090313	106090814	-286000	LINC00460	LINC00460	TRUE	.	.	TRUE	TRUE
chr13_106095855_106096367	chr13	106095855	106096367	-280452	LINC00460	LINC00460	TRUE	.	.	.	.
chr13_106096505_106097006	chr13	106096505	106097006	-279808	LINC00460	LINC00460	TRUE	.	.	.	TRUE
chr13_106100178_106100853	chr13	106100178	106100853	-276048	LINC00460	LINC00460	TRUE	.	.	TRUE	TRUE
chr13_106103938_106104439	chr13	106103938	106104439	-272375	LINC00460	LINC00460	TRUE	.	.	.	.
chr13_106129237_106129787	chr13	106129237	106129787	-247051	LINC00460	LINC00460	TRUE	.	.	.	TRUE
chr13_106132130_106132631	chr13	106132130	106132631	-244183	LINC00460	LINC00460	TRUE	.	.	.	.
chr13_106138963_106139464	chr13	106138963	106139464	-237350	LINC00460	LINC00460	TRUE	.	.	.	TRUE
chr13_106144125_106144626	chr13	106144125	106144626	-232188	LINC00460	LINC00460	TRUE	.	.	.	.
chr13_106146427_106146940	chr13	106146427	106146940	-229880	LINC00460	LINC00460	TRUE	.	.	TRUE	.
chr13_106151279_106151780	chr13	106151279	106151780	-225034	LINC00460	LINC00460	TRUE	.	.	TRUE	TRUE
chr13_106151985_106152500	chr13	106151985	106152500	-224321	LINC00460	LINC00460	TRUE	.	.	TRUE	TRUE
chr13_106156487_106156988	chr13	106156487	106156988	-219826	LINC00460	LINC00460	TRUE	.	.	.	TRUE
chr13_106159505_106160006	chr13	106159505	106160006	-216808	LINC00460	LINC00460	TRUE	.	.	TRUE	.
chr13_106163361_106163862	chr13	106163361	106163862	-212952	LINC00460	LINC00460	TRUE	.	.	TRUE	TRUE
chr13_106173388_106173889	chr13	106173388	106173889	-202925	LINC00460	LINC00460	TRUE	.	.	TRUE	.
chr13_106182428_106182929	chr13	106182428	106182929	-193885	LINC00460	LINC00460	TRUE	.	.	.	TRUE
chr13_106183609_106184110	chr13	106183609	106184110	-192704	LINC00460	LINC00460	TRUE	.	.	TRUE	.
chr13_106213416_106213917	chr13	106213416	106213917	-162897	LINC00460	LINC00460	TRUE	.	.	TRUE	.
chr13_106570377_106570919	chr13	106570377	106570919	-2482	ARGLU1	ARGLU1	TRUE	.	.	TRUE	.
chr13_112606259_112606832	chr13	112606259	112606832	-18360	TUBGCP3	TUBGCP3	TRUE	.	.	TRUE	.
chr14_22521775_22522276	chr14	22521775	22522276	35037	LINC02332	LINC02332	TRUE	.	.	.	.
chr14_22524406_22524907	chr14	22524406	22524907	32406	LINC02332	LINC02332	TRUE	.	.	.	.
chr14_22547157_22547658	chr14	22547157	22547658	9655	LINC02332	LINC02332	TRUE	.	.	TRUE	.
chr14_31251332_31251833	chr14	31251332	31251833	-44059	HECTD1	HECTD1	TRUE	.	.	TRUE	.
chr14_31257983_31258531	chr14	31257983	31258531	-50734	HECTD1	HECTD1	TRUE	.	.	.	.
chr14_31263560_31264063	chr14	31263560	31264063	-56288	HECTD1	HECTD1	TRUE	.	.	.	TRUE
chr14_31265648_31266317	chr14	31265648	31266317	-58459	HECTD1	HECTD1	TRUE	.	.	TRUE	TRUE
chr14_31286647_31287148	chr14	31286647	31287148	-79374	HECTD1	HECTD1	TRUE	.	.	.	.
chr14_43168285_43168786	chr14	43168285	43168786	1338761	FSCB	FSCB	TRUE	.	.	.	.
chr14_49640802_49641303	chr14	49640802	49641303	-5822	DNAAF2	DNAAF2	TRUE	.	.	.	TRUE
chr14_49641724_49642231	chr14	49641724	49642231	-6747	DNAAF2	DNAAF2	TRUE	.	.	.	.
chr14_53608321_53608879	chr14	53608321	53608879	339884	MIR5580	MIR5580	TRUE	.	.	TRUE	TRUE
chr14_53613599_53614289	chr14	53613599	53614289	334540	MIR5580	MIR5580	TRUE	.	.	.	TRUE
chr14_53943142_53943643	chr14	53943142	53943643	5092	MIR5580	MIR5580	TRUE	.	.	.	.
chr14_68814488_68814989	chr14	68814488	68814989	-18495	ZFP36L1	ZFP36L1	TRUE	.	.	TRUE	.
chr14_71116651_71117152	chr14	71116651	71117152	-203569	SIPA1L1	SIPA1L1	TRUE	.	.	.	.
chr14_77033231_77034311	chr14	77033231	77034311	-5072	IRF2BPL	IRF2BPL	TRUE	.	.	TRUE	.
chr14_80941368_80942100	chr14	80941368	80942100	-2194	CEP128	CEP128	TRUE	.	.	TRUE	.
chr14_92692720_92693221	chr14	92692720	92693221	55732	LGMN	LGMN	TRUE	.	.	.	.
chr14_92693957_92694458	chr14	92693957	92694458	54495	LGMN	LGMN	TRUE	.	.	.	TRUE
chr14_102078596_102079097	chr14	102078596	102079097	8329	HSP90AA1	HSP90AA1	TRUE	.	.	.	.
chr14_103115037_103115553	chr14	103115037	103115553	7614	LINC00677	LINC00677	TRUE	.	.	TRUE	.
chr14_103207496_103207997	chr14	103207496	103207997	-18718	LINC00605	LINC00605	TRUE	.	.	.	.
chr14_105045626_105046144	chr14	105045626	105046144	19665	GPR132	GPR132	TRUE	.	.	.	.
chr14_106348943_106349444	chr14	106348943	106349444	61519	LINC00226	LINC00226	TRUE	.	.	TRUE	.
chr15_35306562_35307107	chr15	35306562	35307107	65530	MIR3942	MIR3942	TRUE	.	.	TRUE	.
chr15_38886523_38887024	chr15	38886523	38887024	190175	C15orf53	LINC02694	TRUE	.	.	.	TRUE
chr15_39316849_39317350	chr15	39316849	39317350	66430	C15orf54	C15orf54	TRUE	.	.	.	.
chr15_39326341_39326842	chr15	39326341	39326842	75922	C15orf54	C15orf54	TRUE	.	.	.	.
chr15_39393935_39394436	chr15	39393935	39394436	143516	C15orf54	C15orf54	TRUE	.	.	.	TRUE
chr15_39420238_39420739	chr15	39420238	39420739	-160591	THBS1	THBS1	TRUE	.	.	.	.
chr15_41621374_41621875	chr15	41621374	41621875	-38788	MGA	MGA	TRUE	.	.	.	.
chr15_48719571_48720072	chr15	48719571	48720072	-74033	FBN1	FBN1	TRUE	.	.	.	TRUE
chr15_48723198_48723701	chr15	48723198	48723701	-77661	FBN1	FBN1	TRUE	.	.	.	TRUE
chr15_52116003_52116504	chr15	52116003	52116504	-3478	BCL2L10	BCL2L10	TRUE	.	.	.	TRUE
chr15_68298996_68299497	chr15	68298996	68299497	21443	FEM1B	FEM1B	TRUE	.	.	.	.
chr15_68300233_68300734	chr15	68300233	68300734	22680	FEM1B	FEM1B	TRUE	.	.	.	.
chr15_72604763_72605264	chr15	72604763	72605264	17796	MIR630	MIR630	TRUE	.	.	TRUE	TRUE
chr15_75065409_75065910	chr15	75065409	75065910	22390	PPCDC	PPCDC	TRUE	.	.	.	.
chr15_75069500_75070001	chr15	75069500	75070001	26481	PPCDC	PPCDC	TRUE	.	.	.	.
chr15_75077551_75078052	chr15	75077551	75078052	34532	PPCDC	PPCDC	TRUE	.	.	TRUE	TRUE
chr15_75090260_75090761	chr15	75090260	75090761	47241	PPCDC	PPCDC	TRUE	.	.	.	TRUE
chr15_81023399_81023900	chr15	81023399	81023900	22695	TLNRD1	TLNRD1	TRUE	.	.	.	.
chr15_81024441_81024942	chr15	81024441	81024942	23737	TLNRD1	TLNRD1	TRUE	.	.	.	.
chr15_81029331_81029832	chr15	81029331	81029832	28627	TLNRD1	TLNRD1	TRUE	.	.	TRUE	TRUE
chr15_81032622_81033123	chr15	81032622	81033123	31918	TLNRD1	TLNRD1	TRUE	.	.	TRUE	.
chr15_81859686_81860187	chr15	81859686	81860187	186207	MEX3B	MEX3B	TRUE	.	.	.	.
chr15_92820269_92820861	chr15	92820269	92820861	25081	ASB9P1	ASB9P1	TRUE	.	.	TRUE	.
chr15_97316296_97316797	chr15	97316296	97316797	205265	LINC02254	LINC02254	TRUE	.	.	.	TRUE
chr15_97319325_97319844	chr15	97319325	97319844	202227	LINC02254	LINC02254	TRUE	.	.	.	TRUE
chr16_3086794_3087585	chr16	3086794	3087585	12128	ZSCAN10	ZSCAN10	TRUE	.	.	TRUE	TRUE
chr16_3646226_3646727	chr16	3646226	3646727	-6463	DNASE1	DNASE1	TRUE	.	.	TRUE	TRUE
chr16_4298984_4299534	chr16	4298984	4299534	-15502	GLIS2	GLIS2	TRUE	.	.	TRUE	TRUE
chr16_8655042_8655543	chr16	8655042	8655543	-19295	ABAT	ABAT	TRUE	.	.	.	.
chr16_11188896_11189397	chr16	11188896	11189397	67036	SOCS1	SOCS1	TRUE	.	.	TRUE	.
chr16_11198768_11199297	chr16	11198768	11199297	57150	SOCS1	SOCS1	TRUE	.	.	TRUE	.
chr16_11252024_11252525	chr16	11252024	11252525	3908	SOCS1	SOCS1	TRUE	.	.	.	TRUE
chr16_11391458_11391959	chr16	11391458	11391959	46270	RMI2	RMI2	TRUE	.	.	.	.
chr16_29288785_29289286	chr16	29288785	29289286	-13252	SNX29P2	SNX29P2	TRUE	.	.	TRUE	.
chr16_34581124_34581632	chr16	34581124	34581632	589013	UBE2MP1	UBE2MP1	TRUE	.	.	.	.
chr16_34581988_34582586	chr16	34581988	34582586	588104	UBE2MP1	UBE2MP1	TRUE	.	.	.	.
chr16_34582705_34583359	chr16	34582705	34583359	587359	UBE2MP1	UBE2MP1	TRUE	.	.	.	.
chr16_34586697_34587198	chr16	34586697	34587198	583444	UBE2MP1	UBE2MP1	TRUE	.	.	.	.
chr16_34587916_34588520	chr16	34587916	34588520	582173	UBE2MP1	UBE2MP1	TRUE	.	.	.	.
chr16_34592594_34593478	chr16	34592594	34593478	577355	UBE2MP1	UBE2MP1	TRUE	.	.	.	TRUE
chr16_34594924_34595469	chr16	34594924	34595469	575195	UBE2MP1	UBE2MP1	TRUE	.	.	.	.
chr16_46388447_46389260	chr16	46388447	46389260	180244	ANKRD26P1	ANKRD26P1	TRUE	.	.	.	.
chr16_46389600_46390101	chr16	46389600	46390101	179247	ANKRD26P1	ANKRD26P1	TRUE	.	.	.	.
chr16_46399202_46400885	chr16	46399202	46400885	169054	ANKRD26P1	ANKRD26P1	TRUE	.	.	.	.
chr16_46401257_46401758	chr16	46401257	46401758	167590	ANKRD26P1	ANKRD26P1	TRUE	.	.	.	.
chr16_50693286_50693787	chr16	50693286	50693787	-3603	NOD2	NOD2	TRUE	.	.	TRUE	.
chr16_57590981_57591845	chr16	57590981	57591845	-28280	ADGRG1	ADGRG1	TRUE	.	.	TRUE	TRUE
chr16_57601975_57602476	chr16	57601975	57602476	-17468	ADGRG1	ADGRG1	TRUE	.	.	.	.
chr16_72234289_72234790	chr16	72234289	72234790	-62089	PMFBP1	PMFBP1	TRUE	.	.	TRUE	.
chr16_72768593_72769094	chr16	72768593	72769094	-103834	LINC01572	LINC01572	TRUE	.	.	.	.
chr16_82136877_82137378	chr16	82136877	82137378	33097	MPHOSPH6	MPHOSPH6	TRUE	.	.	TRUE	.
chr16_89261787_89262288	chr16	89261787	89262288	-34091	LOC105371414	LOC105371414	TRUE	.	.	.	.
chr17_6936363_6936864	chr17	6936363	6936864	42836	ALOX12P2	ALOX12P2	TRUE	.	.	.	.
chr17_6940232_6940733	chr17	6940232	6940733	46705	ALOX12P2	ALOX12P2	TRUE	.	.	.	TRUE
chr17_15433076_15433577	chr17	15433076	15433577	34285	CDRT4	CDRT4	TRUE	.	.	.	TRUE
chr17_26619691_26620293	chr17	26619691	26620293	469249	LOC105371703	LOC105371703	TRUE	.	.	.	.
chr17_26885255_26886036	chr17	26885255	26886036	203596	LOC105371703	LOC105371703	TRUE	.	.	.	.
chr17_27461488_27461989	chr17	27461488	27461989	-10272	KSR1	KSR1	TRUE	.	.	TRUE	.
chr17_28204720_28205221	chr17	28204720	28205221	-21593	PYY2	PYY2	TRUE	.	.	.	TRUE
chr17_30961041_30961542	chr17	30961041	30961542	-9647	RNF135	RNF135	TRUE	.	.	.	.
chr17_31582052_31582553	chr17	31582052	31582553	6891	MIR365B	MIR365B	TRUE	.	.	.	.
chr17_32127307_32127917	chr17	32127307	32127917	-14842	RHOT1	RHOT1	TRUE	.	.	TRUE	.
chr17_35497919_35498420	chr17	35497919	35498420	-10430	SLFN12L	SLFN12L	TRUE	.	.	.	.
chr17_39754247_39754748	chr17	39754247	39754748	14530	GRB7	GRB7	TRUE	.	.	TRUE	.
chr17_41792664_41793596	chr17	41792664	41793596	-6362	JUP	JUP	TRUE	.	.	TRUE	TRUE
chr17_43232257_43232758	chr17	43232257	43232758	1470	RNU2-1	RNU2-1	TRUE	.	.	TRUE	.
chr17_47070207_47070708	chr17	47070207	47070708	-91209	RPRML	RPRML	TRUE	.	.	TRUE	TRUE
chr17_47077532_47078033	chr17	47077532	47078033	-98534	RPRML	RPRML	TRUE	.	.	TRUE	TRUE
chr17_47629711_47630212	chr17	47629711	47630212	-19877	KPNB1	KPNB1	TRUE	.	.	.	.
chr17_48127314_48127815	chr17	48127314	48127815	19979	SNX11	SNX11	TRUE	.	.	.	TRUE
chr17_50890702_50891203	chr17	50890702	50891203	-22974	TOB1	TOB1	TRUE	.	.	.	TRUE
chr17_59853171_59853731	chr17	59853171	59853731	12185	MIR21	MIR21	TRUE	.	.	TRUE	TRUE
chr17_59855300_59855801	chr17	59855300	59855801	14284	MIR21	MIR21	TRUE	.	.	.	.
chr17_60135242_60135967	chr17	60135242	60135967	-14332	CA4	CA4	TRUE	.	.	TRUE	.
chr17_62965623_62966454	chr17	62965623	62966454	21823	MIR633	MIR633	TRUE	.	.	TRUE	.
chr17_62981918_62982419	chr17	62981918	62982419	-27369	TANC2	TANC2	TRUE	.	.	TRUE	TRUE
chr17_62995276_62995777	chr17	62995276	62995777	-14011	TANC2	TANC2	TRUE	.	.	.	.
chr17_64413515_64414016	chr17	64413515	64414016	11405			TRUE	.	.	TRUE	.
chr17_64927380_64927881	chr17	64927380	64927881	-8139	LRRC37A3	LRRC37A3	TRUE	.	.	.	TRUE
chr17_68180707_68181208	chr17	68180707	68181208	-17703	ARHGAP27P2	ARHGAP27P2	TRUE	.	.	.	.
chr17_81002303_81002804	chr17	81002303	81002804	10712	CHMP6	CHMP6	TRUE	.	.	TRUE	.
chr17_81345840_81346531	chr17	81345840	81346531	-15511	TMEM105	TMEM105	TRUE	.	.	TRUE	.
chr18_22816643_22817144	chr18	22816643	22817144	-30056	LOC101927571	LOC101927571	TRUE	.	.	TRUE	.
chr18_22885520_22886021	chr18	22885520	22886021	-47562	RBBP8	RBBP8	TRUE	.	.	TRUE	TRUE
chr18_22914564_22915065	chr18	22914564	22915065	-18518	RBBP8	RBBP8	TRUE	.	.	.	.
chr18_23284000_23284501	chr18	23284000	23284501	128425	CABLES1	CABLES1	TRUE	.	.	.	TRUE
chr18_39796298_39796799	chr18	39796298	39796799	-44553	MIR924HG	MIR924HG	TRUE	.	.	TRUE	.
chr18_39800071_39800572	chr18	39800071	39800572	-41388	LINC01902	LINC01902	TRUE	.	.	TRUE	.
chr18_49017058_49017559	chr18	49017058	49017559	-6395	LOC100129878	LOC100129878	TRUE	.	.	.	TRUE
chr18_69063999_69064500	chr18	69063999	69064500	266169	CCDC102B	CCDC102B	TRUE	.	.	.	.
chr19_488826_489625	chr19	488826	489625	-7265	MADCAM1	MADCAM1	TRUE	.	.	TRUE	.
chr19_782350_782851	chr19	782350	782851	-14792	PTBP1	PTBP1	TRUE	.	.	.	.
chr19_7380541_7381042	chr19	7380541	7381042	-14322	ARHGEF18	ARHGEF18	TRUE	.	.	.	.
chr19_20207742_20208243	chr19	20207742	20208243	40778	ZNF486	ZNF486	TRUE	.	.	.	TRUE
chr19_20221547_20222048	chr19	20221547	20222048	54583	ZNF486	ZNF486	TRUE	.	.	.	.
chr19_20238027_20238750	chr19	20238027	20238750	71174	ZNF486	ZNF486	TRUE	.	.	TRUE	.
chr19_21439345_21439846	chr19	21439345	21439846	42476	ZNF493	ZNF493	TRUE	.	.	.	TRUE
chr19_24140074_24140575	chr19	24140074	24140575	23123	HAVCR1P1	HAVCR1P1	TRUE	.	.	.	TRUE
chr19_29844909_29845410	chr19	29844909	29845410	33141	CCNE1	CCNE1	TRUE	.	.	.	.
chr19_40831858_40832359	chr19	40831858	40832359	18339	CYP2A6	CYP2A6	TRUE	.	.	TRUE	TRUE
chr19_41174209_41174710	chr19	41174209	41174710	-18748	CYP2S1	CYP2S1	TRUE	.	.	TRUE	.
chr19_41175920_41176454	chr19	41175920	41176454	-17020	CYP2S1	CYP2S1	TRUE	.	.	TRUE	TRUE
chr19_43329121_43329622	chr19	43329121	43329622	-19685	PRG1	PRG1	TRUE	.	.	TRUE	.
chr19_44724971_44725651	chr19	44724971	44725651	-23410	BCL3	BCL3	TRUE	.	.	.	.
chr19_46860003_46860911	chr19	46860003	46860911	-9462	AP2S1	AP2S1	TRUE	.	.	TRUE	.
chr19_46890499_46891142	chr19	46890499	46891142	-27856	ARHGAP35	ARHGAP35	TRUE	.	.	TRUE	TRUE
chr19_46902304_46902805	chr19	46902304	46902805	-16122	ARHGAP35	ARHGAP35	TRUE	.	.	.	TRUE
chr19_52601991_52602492	chr19	52601991	52602492	5557	ZNF137P	ZNF137P	TRUE	.	.	.	.
chr19_53460960_53461461	chr19	53460960	53461461	-6525	ZNF813	ZNF813	TRUE	.	.	.	.
chr19_53461762_53462263	chr19	53461762	53462263	-5723	ZNF813	ZNF813	TRUE	.	.	.	.
chr19_55606150_55606651	chr19	55606150	55606651	6060	ZNF524	ZNF524	TRUE	.	.	TRUE	.
chr19_57465694_57466195	chr19	57465694	57466195	-9205	VN1R1	VN1R1	TRUE	.	.	.	.
chr19_57903291_57903792	chr19	57903291	57903792	13069	ZNF417	ZNF417	TRUE	.	.	.	.
chr19_58009574_58010075	chr19	58009574	58010075	-6478	ZNF606	ZNF606	TRUE	.	.	.	.
chr2_7725488_7725989	chr2	7725488	7725989	173917	LOC101929551	LOC101929551	TRUE	.	.	.	.
chr2_8388728_8389229	chr2	8388728	8389229	-60559	LINC00299	LINC00299	TRUE	.	.	.	.
chr2_8412082_8412583	chr2	8412082	8412583	-83913	LINC00299	LINC00299	TRUE	.	.	.	.
chr2_8433317_8433818	chr2	8433317	8433818	-105148	LINC00299	LINC00299	TRUE	.	.	.	.
chr2_8438856_8439357	chr2	8438856	8439357	-110687	LINC00299	LINC00299	TRUE	.	.	TRUE	.
chr2_8484479_8484980	chr2	8484479	8484980	99063	LINC01814	LINC01814	TRUE	.	.	TRUE	.
chr2_8500527_8501145	chr2	8500527	8501145	82956	LINC01814	LINC01814	TRUE	.	.	.	TRUE
chr2_10120100_10120764	chr2	10120100	10120764	-2136	RRM2	RRM2	TRUE	.	.	TRUE	TRUE
chr2_19256239_19256740	chr2	19256239	19256740	-91940	MIR4757	MIR4757	TRUE	.	.	.	.
chr2_19273224_19273725	chr2	19273224	19273725	-74955	MIR4757	MIR4757	TRUE	.	.	.	TRUE
chr2_20614163_20614664	chr2	20614163	20614664	-21865	HS1BP3-IT1	HS1BP3-IT1	TRUE	.	.	.	.
chr2_24522149_24522661	chr2	24522149	24522661	-62072	NCOA1	NCOA1	TRUE	.	.	.	TRUE
chr2_25228710_25229211	chr2	25228710	25229211	23171	DNMT3A	DNMT3A	TRUE	.	.	.	TRUE
chr2_27752649_27753150	chr2	27752649	27753150	-18818	MRPL33	MRPL33	TRUE	.	.	TRUE	.
chr2_27754047_27754548	chr2	27754047	27754548	-17420	MRPL33	MRPL33	TRUE	.	.	TRUE	.
chr2_27763208_27763709	chr2	27763208	27763709	-8259	MRPL33	MRPL33	TRUE	.	.	.	.
chr2_27765961_27766462	chr2	27765961	27766462	-5506	MRPL33	MRPL33	TRUE	.	.	TRUE	.
chr2_42794426_42794927	chr2	42794426	42794927	-2065	HAAO	HAAO	TRUE	.	.	.	.
chr2_42828796_42829297	chr2	42828796	42829297	-36435	HAAO	HAAO	TRUE	.	.	.	.
chr2_46650472_46650973	chr2	46650472	46650973	33550	CRIPT	CRIPT	TRUE	.	.	.	.
chr2_47487093_47487594	chr2	47487093	47487594	-40194	HCG2040054	HCG2040054	TRUE	.	.	TRUE	.
chr2_54722692_54723193	chr2	54722692	54723193	-2070	EML6	EML6	TRUE	.	.	.	TRUE
chr2_78353305_78353806	chr2	78353305	78353806	-62824	LOC101927967	LOC101927967	TRUE	.	.	.	TRUE
chr2_78396973_78397474	chr2	78396973	78397474	-106492	LOC101927967	LOC101927967	TRUE	.	.	TRUE	.
chr2_78416448_78416949	chr2	78416448	78416949	-125967	LOC101927967	LOC101927967	TRUE	.	.	.	TRUE
chr2_78417169_78417670	chr2	78417169	78417670	-126688	LOC101927967	LOC101927967	TRUE	.	.	.	TRUE
chr2_78417893_78418394	chr2	78417893	78418394	-127388	LOC105374820	LOC105374820	TRUE	.	.	.	.
chr2_78431217_78431718	chr2	78431217	78431718	-114064	LOC105374820	LOC105374820	TRUE	.	.	.	.
chr2_78541664_78542165	chr2	78541664	78542165	-3617	LOC105374820	LOC105374820	TRUE	.	.	TRUE	TRUE
chr2_84958198_84958707	chr2	84958198	84958707	-12656	KCMF1	KCMF1	TRUE	.	.	TRUE	TRUE
chr2_84963647_84964148	chr2	84963647	84964148	-7211	KCMF1	KCMF1	TRUE	.	.	.	TRUE
chr2_87584143_87584644	chr2	87584143	87584644	-45362	MIR4435-1	MIR4435-1	TRUE	.	.	.	.
chr2_87639999_87640500	chr2	87639999	87640500	10489	MIR4435-2	MIR4435-2	TRUE	.	.	TRUE	.
chr2_88016233_88017087	chr2	88016233	88017087	-30870	RGPD1	RGPD1	TRUE	.	.	TRUE	.
chr2_88866018_88866519	chr2	88866018	88866519	53898	MIR4436A	MIR4436A	TRUE	.	.	.	.
chr2_101900297_101900798	chr2	101900297	101900798	-82918	LINC01127	LINC01127	TRUE	.	.	.	TRUE
chr2_108315335_108315836	chr2	108315335	108315836	-6653	SULT1C2P1	SULT1C2P1	TRUE	.	.	TRUE	.
chr2_113211127_113211628	chr2	113211127	113211628	-24150	PAX8-AS1	PAX8-AS1	TRUE	.	.	TRUE	TRUE
chr2_113335979_113336480	chr2	113335979	113336480	-57308	PAX8	PAX8	TRUE	.	.	TRUE	.
chr2_113703443_113703944	chr2	113703443	113703944	17675	MIR4782	MIR4782	TRUE	.	.	.	.
chr2_117833134_117833635	chr2	117833134	117833635	18705	DDX18	DDX18	TRUE	.	.	.	TRUE
chr2_118142464_118142965	chr2	118142464	118142965	43672	LOC100506797	THORLNC	TRUE	.	.	TRUE	TRUE
chr2_120735680_120736181	chr2	120735680	120736181	-61361	GLI2	GLI2	TRUE	.	.	TRUE	.
chr2_128263841_128264360	chr2	128263841	128264360	54497	HS6ST1	HS6ST1	TRUE	.	.	TRUE	.
chr2_130836605_130837218	chr2	130836605	130837218	-79740	ARHGEF4	ARHGEF4	TRUE	.	.	TRUE	.
chr2_133641436_133642008	chr2	133641436	133642008	-73262	NCKAP5	NCKAP5	TRUE	.	.	TRUE	.
chr2_138294280_138294860	chr2	138294280	138294860	192686	LINC01832	LINC01832	TRUE	.	.	.	TRUE
chr2_138356123_138356624	chr2	138356123	138356624	-145407	SPOPL	SPOPL	TRUE	.	.	.	.
chr2_138369831_138370332	chr2	138369831	138370332	-131699	SPOPL	SPOPL	TRUE	.	.	.	.
chr2_138373915_138374416	chr2	138373915	138374416	-127615	SPOPL	SPOPL	TRUE	.	.	.	.
chr2_138426021_138426522	chr2	138426021	138426522	-75509	SPOPL	SPOPL	TRUE	.	.	TRUE	.
chr2_138434578_138435079	chr2	138434578	138435079	-66952	SPOPL	SPOPL	TRUE	.	.	.	.
chr2_138445965_138446466	chr2	138445965	138446466	-55565	SPOPL	SPOPL	TRUE	.	.	.	.
chr2_155965935_155966436	chr2	155965935	155966436	288746	LINC01876	LINC01876	TRUE	.	.	TRUE	.
chr2_169767230_169767731	chr2	169767230	169767731	-31332	SSB	SSB	TRUE	.	.	.	.
chr2_169768485_169768986	chr2	169768485	169768986	-30077	SSB	SSB	TRUE	.	.	TRUE	.
chr2_172315179_172315680	chr2	172315179	172315680	-111925	ITGA6	ITGA6	TRUE	.	.	TRUE	.
chr2_173532836_173533337	chr2	173532836	173533337	178253	CDCA7	CDCA7	TRUE	.	.	TRUE	.
chr2_173544542_173545264	chr2	173544542	173545264	190070	CDCA7	CDCA7	TRUE	.	.	TRUE	.
chr2_173553528_173554029	chr2	173553528	173554029	198945	CDCA7	CDCA7	TRUE	.	.	TRUE	TRUE
chr2_173571540_173572041	chr2	173571540	173572041	216957	CDCA7	CDCA7	TRUE	.	.	.	.
chr2_173589579_173590080	chr2	173589579	173590080	234996	CDCA7	CDCA7	TRUE	.	.	.	.
chr2_173590205_173590751	chr2	173590205	173590751	235645	CDCA7	CDCA7	TRUE	.	.	.	TRUE
chr2_173649450_173649951	chr2	173649450	173649951	294867	CDCA7	CDCA7	TRUE	.	.	.	TRUE
chr2_173652464_173653201	chr2	173652464	173653201	297999	CDCA7	CDCA7	TRUE	.	.	TRUE	TRUE
chr2_173654026_173654527	chr2	173654026	173654527	299443	CDCA7	CDCA7	TRUE	.	.	TRUE	.
chr2_173669428_173669929	chr2	173669428	173669929	294541	SP3	SP3	TRUE	.	.	TRUE	TRUE
chr2_173673581_173674082	chr2	173673581	173674082	290388	SP3	SP3	TRUE	.	.	.	.
chr2_173708658_173709159	chr2	173708658	173709159	255311	SP3	SP3	TRUE	.	.	.	.
chr2_176146037_176146538	chr2	176146037	176146538	-4016	MIR10B	MIR10B	TRUE	.	.	.	.
chr2_181076130_181076631	chr2	181076130	181076631	-47457	LINC01934	LINC01934	TRUE	.	.	.	.
chr2_183179060_183179561	chr2	183179060	183179561	54955	NUP35	NUP35	TRUE	.	.	.	.
chr2_185854885_185855386	chr2	185854885	185855386	-54984	FSIP2-AS1	FSIP2-AS1	TRUE	.	.	TRUE	.
chr2_185864662_185865163	chr2	185864662	185865163	-64761	FSIP2-AS1	FSIP2-AS1	TRUE	.	.	TRUE	.
chr2_190587088_190587589	chr2	190587088	190587589	-52596	NEMP2	NEMP2	TRUE	.	.	.	.
chr2_197693133_197693634	chr2	197693133	197693634	-11921	MARS2	MARS2	TRUE	.	.	TRUE	.
chr2_197713161_197713662	chr2	197713161	197713662	8107	MARS2	MARS2	TRUE	.	.	.	.
chr2_207771370_207771871	chr2	207771370	207771871	-2201	FZD5	FZD5	TRUE	.	.	TRUE	.
chr2_223852260_223852761	chr2	223852260	223852761	-14908	AP1S3	AP1S3	TRUE	.	.	.	.
chr2_231378118_231378619	chr2	231378118	231378619	15660	MIR4777	MIR4777	TRUE	.	.	TRUE	TRUE
chr20_341628_342129	chr20	341628	342129	-4848	NRSN2	NRSN2	TRUE	.	.	.	TRUE
chr20_1889102_1889603	chr20	1889102	1889603	-4815	SIRPA	SIRPA	TRUE	.	.	TRUE	TRUE
chr20_3178013_3178514	chr20	3178013	3178514	-4671	LZTS3	LZTS3	TRUE	.	.	.	.
chr20_4135178_4136008	chr20	4135178	4136008	-13186	SMOX	SMOX	TRUE	.	.	.	TRUE
chr20_8114412_8114913	chr20	8114412	8114913	-17603	PLCB1	PLCB1	TRUE	.	.	TRUE	TRUE
chr20_32343432_32343933	chr20	32343432	32343933	-14662	ASXL1	ASXL1	TRUE	.	.	.	TRUE
chr20_32348244_32348745	chr20	32348244	32348745	-9850	ASXL1	ASXL1	TRUE	.	.	.	.
chr20_33654094_33654595	chr20	33654094	33654595	-7942	C20orf144	C20orf144	TRUE	.	.	.	TRUE
chr20_35514532_35515033	chr20	35514532	35515033	14870	C20orf173	C20orf173	TRUE	.	.	TRUE	.
chr20_35516210_35516746	chr20	35516210	35516746	13174	C20orf173	C20orf173	TRUE	.	.	.	TRUE
chr20_38408525_38409026	chr20	38408525	38409026	16555	SNORA71B	SNORA71B	TRUE	.	.	.	TRUE
chr20_38779679_38780180	chr20	38779679	38780180	-25764	PPP1R16B	PPP1R16B	TRUE	.	.	.	TRUE
chr20_41308197_41308698	chr20	41308197	41308698	-8348	ZHX3	ZHX3	TRUE	.	.	.	.
chr20_43550359_43550860	chr20	43550359	43550860	-8386	SGK2	SGK2	TRUE	.	.	TRUE	.
chr20_43657287_43658019	chr20	43657287	43658019	-9940	MYBL2	MYBL2	TRUE	.	.	.	.
chr20_44282065_44282566	chr20	44282065	44282566	28937	FITM2	FITM2	TRUE	.	.	.	.
chr20_44287206_44287707	chr20	44287206	44287707	23796	FITM2	FITM2	TRUE	.	.	.	.
chr20_44351975_44352476	chr20	44351975	44352476	-3576	HNF4A	HNF4A	TRUE	.	.	.	.
chr20_45083096_45083597	chr20	45083096	45083597	17766	KCNS1	KCNS1	TRUE	.	.	.	.
chr20_47972244_47972745	chr20	47972244	47972745	-10732	LINC01523	LINC01523	TRUE	.	.	TRUE	.
chr20_49775218_49775752	chr20	49775218	49775752	-37228	SLC9A8	SLC9A8	TRUE	.	.	.	TRUE
chr20_49964823_49965324	chr20	49964823	49965324	-17903	SNAI1	SNAI1	TRUE	.	.	.	.
chr20_50885963_50886464	chr20	50885963	50886464	23578	ADNP	ADNP	TRUE	.	.	.	TRUE
chr20_52060987_52061488	chr20	52060987	52061488	44247	ZFP64	ZFP64	TRUE	.	.	.	.
chr20_53503781_53504282	chr20	53503781	53504282	-48739	LOC101927770	LOC101927770	TRUE	.	.	TRUE	TRUE
chr20_53592432_53592933	chr20	53592432	53592933	-9585	ZNF217	ZNF217	TRUE	.	.	TRUE	.
chr20_53593840_53594918	chr20	53593840	53594918	-11282	ZNF217	ZNF217	TRUE	.	.	TRUE	.
chr20_62376416_62376917	chr20	62376416	62376917	-9354	LAMA5	LAMA5	TRUE	.	.	TRUE	.
chr20_62382639_62383140	chr20	62382639	62383140	-4176	RPS21	RPS21	TRUE	.	.	TRUE	.
chr21_14027128_14027629	chr21	14027128	14027629	-46934	ANKRD20A11P	ANKRD20A11P	TRUE	.	.	TRUE	.
chr21_14927047_14927548	chr21	14927047	14927548	-8629	LINC02246	LINC02246	TRUE	.	.	TRUE	.
chr21_29181987_29182488	chr21	29181987	29182488	-11257	LINC00189	LINC00189	TRUE	.	.	.	TRUE
chr21_29376511_29377023	chr21	29376511	29377023	4266	BACH1-IT2	BACH1-IT2	TRUE	.	.	TRUE	.
chr21_29381903_29382441	chr21	29381903	29382441	9671	BACH1-IT2	BACH1-IT2	TRUE	.	.	.	TRUE
chr21_29386758_29387273	chr21	29386758	29387273	14514	BACH1-IT2	BACH1-IT2	TRUE	.	.	.	.
chr21_29449515_29450016	chr21	29449515	29450016	-46282	BACH1-IT3	BACH1-IT3	TRUE	.	.	TRUE	.
chr21_29476367_29476869	chr21	29476367	29476869	-19429	BACH1-IT3	BACH1-IT3	TRUE	.	.	.	.
chr21_36429954_36430464	chr21	36429954	36430464	36232	CLDN14	CLDN14	TRUE	.	.	TRUE	TRUE
chr21_42812492_42813017	chr21	42812492	42813017	-32760	LINC01668	LINC01668	TRUE	.	.	.	.
chr22_22342792_22343302	chr22	22342792	22343302	44949	BMS1P20	BMS1P20	TRUE	.	.	.	.
chr22_22720256_22720757	chr22	22720256	22720757	74194	GGTLC2	GGTLC2	TRUE	.	.	.	.
chr22_22720974_22721475	chr22	22720974	22721475	74912	GGTLC2	GGTLC2	TRUE	.	.	TRUE	.
chr22_22758367_22758868	chr22	22758367	22758868	-64159	MIR650	MIR650	TRUE	.	.	TRUE	.
chr22_22818787_22819288	chr22	22818787	22819288	-3739	MIR650	MIR650	TRUE	.	.	.	.
chr22_35426480_35426981	chr22	35426480	35426981	26607	MCM5	MCM5	TRUE	.	.	TRUE	.
chr22_35430785_35431298	chr22	35430785	35431298	30918	MCM5	MCM5	TRUE	.	.	.	.
chr22_35446346_35446847	chr22	35446346	35446847	46473	MCM5	MCM5	TRUE	.	.	TRUE	TRUE
chr22_42325079_42325580	chr22	42325079	42325580	-41402	TCF20	TCF20	TRUE	.	.	TRUE	.
chr22_42686192_42686693	chr22	42686192	42686693	34468	A4GALT	A4GALT	TRUE	.	.	TRUE	.
chr22_42687007_42687508	chr22	42687007	42687508	33653	A4GALT	A4GALT	TRUE	.	.	TRUE	.
chr22_42688263_42688764	chr22	42688263	42688764	32397	A4GALT	A4GALT	TRUE	.	.	TRUE	.
chr22_49934092_49934593	chr22	49934092	49934593	15712	CRELD2	CRELD2	TRUE	.	.	TRUE	TRUE
chr22_49935100_49935601	chr22	49935100	49935601	16720	CRELD2	CRELD2	TRUE	.	.	TRUE	.
chr22_49951145_49951665	chr22	49951145	49951665	-9090	PIM3	PIM3	TRUE	.	.	TRUE	.
chr22_49956391_49956892	chr22	49956391	49956892	-3854	PIM3	PIM3	TRUE	.	.	TRUE	.
chr22_50538122_50538623	chr22	50538122	50538623	-5793	ODF3B	ODF3B	TRUE	.	.	.	.
chr3_3851888_3852389	chr3	3851888	3852389	-51263	LOC100130207	LOC100130207	TRUE	.	.	.	.
chr3_3998089_3998590	chr3	3998089	3998590	-197464	LOC100130207	LOC100130207	TRUE	.	.	.	.
chr3_5694101_5694602	chr3	5694101	5694602	-444096	MIR4790	MIR4790	TRUE	.	.	.	TRUE
chr3_6528934_6529435	chr3	6528934	6529435	276265	GRM7-AS3	GRM7-AS3	TRUE	.	.	.	TRUE
chr3_6541030_6541531	chr3	6541030	6541531	264169	GRM7-AS3	GRM7-AS3	TRUE	.	.	TRUE	TRUE
chr3_8611621_8612122	chr3	8611621	8612122	32927	SSUH2	SSUH2	TRUE	.	.	TRUE	.
chr3_28059256_28059757	chr3	28059256	28059757	-182127	CMC1	CMC1	TRUE	.	.	TRUE	.
chr3_32457985_32458486	chr3	32457985	32458486	44676	CMTM6	CMTM6	TRUE	.	.	TRUE	.
chr3_32469803_32470320	chr3	32469803	32470320	32850	CMTM6	CMTM6	TRUE	.	.	.	TRUE
chr3_93470301_93470802	chr3	93470301	93470802	503530	PROS1	PROS1	TRUE	.	.	.	.
chr3_108031809_108032310	chr3	108031809	108032310	59029	CD47	CD47	TRUE	.	.	TRUE	TRUE
chr3_112664869_112665370	chr3	112664869	112665370	-23976	CCDC80	CCDC80	TRUE	.	.	TRUE	.
chr3_112672179_112672680	chr3	112672179	112672680	-31286	CCDC80	CCDC80	TRUE	.	.	TRUE	.
chr3_112688789_112689290	chr3	112688789	112689290	-47896	CCDC80	CCDC80	TRUE	.	.	TRUE	TRUE
chr3_112693241_112693742	chr3	112693241	112693742	-52348	CCDC80	CCDC80	TRUE	.	.	TRUE	.
chr3_112699493_112699995	chr3	112699493	112699995	49575	LINC02042	LINC02042	TRUE	.	.	.	TRUE
chr3_112724329_112724830	chr3	112724329	112724830	24740	LINC02042	LINC02042	TRUE	.	.	TRUE	.
chr3_112734705_112735206	chr3	112734705	112735206	14364	LINC02042	LINC02042	TRUE	.	.	.	TRUE
chr3_112751963_112752550	chr3	112751963	112752550	-2937	LINC02042	LINC02042	TRUE	.	.	.	TRUE
chr3_112773809_112774507	chr3	112773809	112774507	-24839	LINC02042	LINC02042	TRUE	.	.	TRUE	TRUE
chr3_112795509_112796045	chr3	112795509	112796045	-6701	LOC100129297	CD200R1L-AS1	TRUE	.	.	TRUE	.
chr3_112799905_112800406	chr3	112799905	112800406	-2323	LOC100129297	CD200R1L-AS1	TRUE	.	.	.	.
chr3_129185770_129186271	chr3	129185770	129186271	-2053	CNBP	CNBP	TRUE	.	.	.	TRUE
chr3_130002794_130003436	chr3	130002794	130003436	28722	TRH	TRH	TRUE	.	.	TRUE	.
chr3_134597526_134598027	chr3	134597526	134598027	53269	KY	KY	TRUE	.	.	.	TRUE
chr3_138774413_138774936	chr3	138774413	138774936	-15315	PIK3CB	PIK3CB	TRUE	.	.	.	TRUE
chr3_146502838_146503339	chr3	146502838	146503339	-7097	PLSCR2	PLSCR2	TRUE	.	.	.	TRUE
chr3_146503585_146504187	chr3	146503585	146504187	-7895	PLSCR2	PLSCR2	TRUE	.	.	.	TRUE
chr3_146506621_146507122	chr3	146506621	146507122	-10880	PLSCR2	PLSCR2	TRUE	.	.	.	TRUE
chr3_150038807_150039308	chr3	150038807	150039308	-55691	TMEM183B	TMEM183B	TRUE	.	.	TRUE	TRUE
chr3_152258421_152258922	chr3	152258421	152258922	-9797	MBNL1	MBNL1	TRUE	.	.	.	TRUE
chr3_158768266_158768767	chr3	158768266	158768767	-33410	MFSD1	MFSD1	TRUE	.	.	TRUE	.
chr3_158769065_158769566	chr3	158769065	158769566	-32611	MFSD1	MFSD1	TRUE	.	.	.	.
chr3_158775965_158776466	chr3	158775965	158776466	-25711	MFSD1	MFSD1	TRUE	.	.	.	.
chr3_167669671_167670172	chr3	167669671	167670172	-11918	WDR49	WDR49	TRUE	.	.	.	.
chr3_170884134_170884635	chr3	170884134	170884635	-14128	RPL22L1	RPL22L1	TRUE	.	.	TRUE	TRUE
chr3_187828914_187829415	chr3	187828914	187829415	-83439	BCL6	BCL6	TRUE	.	.	.	.
chr3_187850309_187850810	chr3	187850309	187850810	-104834	BCL6	BCL6	TRUE	.	.	TRUE	.
chr3_187862442_187862943	chr3	187862442	187862943	113715	LINC01991	LINC01991	TRUE	.	.	TRUE	.
chr3_189022700_189023201	chr3	189022700	189023201	-75311	TPRG1-AS1	TPRG1-AS1	TRUE	.	.	TRUE	.
chr3_189132253_189132796	chr3	189132253	189132796	-39450	TPRG1	TPRG1	TRUE	.	.	.	TRUE
chr3_189324618_189325167	chr3	189324618	189325167	-84298	TPRG1-AS2	TPRG1-AS2	TRUE	.	.	.	.
chr3_194472227_194472728	chr3	194472227	194472728	-4238	ATP13A3	ATP13A3	TRUE	.	.	.	.
chr3_194496393_194496894	chr3	194496393	194496894	9503	LINC00884	LINC00884	TRUE	.	.	.	.
chr3_194497853_194498354	chr3	194497853	194498354	10963	LINC00884	LINC00884	TRUE	.	.	TRUE	.
chr4_259402_259903	chr4	259402	259903	45817	ZNF732	ZNF732	TRUE	.	.	.	TRUE
chr4_1548771_1549272	chr4	1548771	1549272	134970	FAM53A	FAM53A	TRUE	.	.	.	.
chr4_4045782_4046283	chr4	4045782	4046283	-90604	FAM86EP	FAM86EP	TRUE	.	.	.	.
chr4_13195372_13195873	chr4	13195372	13195873	288743	RAB28	RAB28	TRUE	.	.	.	.
chr4_13261506_13262007	chr4	13261506	13262007	222609	RAB28	RAB28	TRUE	.	.	.	.
chr4_13294834_13295335	chr4	13294834	13295335	189281	RAB28	RAB28	TRUE	.	.	.	.
chr4_13325670_13326171	chr4	13325670	13326171	158445	RAB28	RAB28	TRUE	.	.	.	.
chr4_15677621_15678122	chr4	15677621	15678122	-3858	FAM200B	FAM200B	TRUE	.	.	TRUE	TRUE
chr4_23788089_23788992	chr4	23788089	23788992	92752	PPARGC1A	PPARGC1A	TRUE	.	.	.	TRUE
chr4_37873310_37873811	chr4	37873310	37873811	-17524	TBC1D1	TBC1D1	TRUE	.	.	.	TRUE
chr4_39135220_39135723	chr4	39135220	39135723	-46933	WDR19	WDR19	TRUE	.	.	TRUE	.
chr4_41967365_41967866	chr4	41967365	41967866	-14081	DCAF4L1	DCAF4L1	TRUE	.	.	.	.
chr4_81635642_81636162	chr4	81635642	81636162	-163974	RASGEF1B	RASGEF1B	TRUE	.	.	.	.
chr4_82462342_82462843	chr4	82462342	82462843	32112	ENOPH1	ENOPH1	TRUE	.	.	TRUE	.
chr4_86818761_86819262	chr4	86818761	86819262	30252	SLC10A6	SLC10A6	TRUE	.	.	TRUE	.
chr4_89492682_89493183	chr4	89492682	89493183	-184922	GPRIN3	GPRIN3	TRUE	.	.	.	TRUE
chr4_101411243_101411744	chr4	101411243	101411744	63716	FLJ20021	FLJ20021	TRUE	.	.	TRUE	.
chr4_123588029_123588845	chr4	123588029	123588845	-61554	LINC01091	LINC01091	TRUE	.	.	TRUE	TRUE
chr4_124617308_124618141	chr4	124617308	124618141	-59290	LINC02516	LINC02516	TRUE	.	.	TRUE	.
chr4_157564118_157564643	chr4	157564118	157564643	-8110	LINC02433	LINC02433	TRUE	.	.	TRUE	TRUE
chr4_176340862_176341363	chr4	176340862	176341363	21173	SPCS3	SPCS3	TRUE	.	.	.	.
chr4_183492700_183493201	chr4	183492700	183493201	11565	LOC389247	LOC389247	TRUE	.	.	.	TRUE
chr5_6674420_6674921	chr5	6674420	6674921	33041	LINC02102	LINC02102	TRUE	.	.	TRUE	.
chr5_10201348_10201849	chr5	10201348	10201849	48311	FAM173B	ATPSCKMT	TRUE	.	.	.	.
chr5_13957001_13957505	chr5	13957001	13957505	-12773	DNAH5	DNAH5	TRUE	.	.	.	.
chr5_13976806_13977307	chr5	13976806	13977307	-32576	DNAH5	DNAH5	TRUE	.	.	TRUE	.
chr5_14008992_14009493	chr5	14008992	14009493	-64762	DNAH5	DNAH5	TRUE	.	.	.	.
chr5_14627326_14627827	chr5	14627326	14627827	24806	SNORD141B	SNORD141B	TRUE	.	.	TRUE	TRUE
chr5_18732478_18732979	chr5	18732478	18732979	925454	LINC02223	LINC02223	TRUE	.	.	.	TRUE
chr5_18744899_18745401	chr5	18744899	18745401	937876	LINC02223	LINC02223	TRUE	.	.	TRUE	.
chr5_18745832_18746333	chr5	18745832	18746333	938808	LINC02223	LINC02223	TRUE	.	.	.	.
chr5_24271674_24272175	chr5	24271674	24272175	320576	C5orf17	C5orf17	TRUE	.	.	TRUE	TRUE
chr5_33435819_33436331	chr5	33435819	33436331	-4621	TARS	TARS	TRUE	.	.	.	TRUE
chr5_33470509_33471010	chr5	33470509	33471010	29983	TARS	TARS	TRUE	.	.	.	TRUE
chr5_34970549_34971050	chr5	34970549	34971050	41206	DNAJC21	DNAJC21	TRUE	.	.	.	TRUE
chr5_37086498_37086999	chr5	37086498	37086999	-162298	LOC105374727	LOC105374727	TRUE	.	.	.	TRUE
chr5_37090389_37090890	chr5	37090389	37090890	-158407	LOC105374727	LOC105374727	TRUE	.	.	.	.
chr5_42950495_42951071	chr5	42950495	42951071	42550	FLJ32255	FLJ32255	TRUE	.	.	.	TRUE
chr5_42951396_42951897	chr5	42951396	42951897	41687	FLJ32255	FLJ32255	TRUE	.	.	.	.
chr5_43000332_43000917	chr5	43000332	43000917	-7291	FLJ32255	FLJ32255	TRUE	.	.	TRUE	.
chr5_43009216_43009717	chr5	43009216	43009717	9345	LOC648987	LOC648987	TRUE	.	.	TRUE	.
chr5_43010576_43011077	chr5	43010576	43011077	7985	LOC648987	LOC648987	TRUE	.	.	.	.
chr5_52957092_52957593	chr5	52957092	52957593	-31984	ITGA2	ITGA2	TRUE	.	.	.	TRUE
chr5_72366264_72366786	chr5	72366264	72366786	46158	PTCD2	PTCD2	TRUE	.	.	.	.
chr5_91279870_91280825	chr5	91279870	91280825	34055	LUCAT1	LUCAT1	TRUE	.	.	TRUE	TRUE
chr5_104178997_104179506	chr5	104178997	104179506	-616450	NUDT12	NUDT12	TRUE	.	.	.	.
chr5_104355329_104355830	chr5	104355329	104355830	-743895	RAB9BP1	RAB9BP1	TRUE	.	.	.	.
chr5_112529451_112529952	chr5	112529451	112529952	-98735	LINC02200	LINC02200	TRUE	.	.	TRUE	.
chr5_131417225_131417726	chr5	131417225	131417726	153466	CDC42SE2	CDC42SE2	TRUE	.	.	.	.
chr5_141325954_141326549	chr5	141325954	141326549	-4434	PCDHGA1	PCDHGA1	TRUE	.	.	.	.
chr5_141785093_141785606	chr5	141785093	141785606	80853	PCDH1	PCDH1	TRUE	.	.	TRUE	.
chr5_141840207_141840708	chr5	141840207	141840708	25745	PCDH1	PCDH1	TRUE	.	.	.	.
chr5_145442622_145443123	chr5	145442622	145443123	392497	PRELID2	PRELID2	TRUE	.	.	.	.
chr5_145464118_145464619	chr5	145464118	145464619	371001	PRELID2	PRELID2	TRUE	.	.	.	.
chr5_145470963_145471464	chr5	145470963	145471464	364156	PRELID2	PRELID2	TRUE	.	.	.	.
chr5_145471831_145472364	chr5	145471831	145472364	363272	PRELID2	PRELID2	TRUE	.	.	TRUE	TRUE
chr5_145484090_145484591	chr5	145484090	145484591	351029	PRELID2	PRELID2	TRUE	.	.	.	TRUE
chr5_145495698_145496199	chr5	145495698	145496199	339421	PRELID2	PRELID2	TRUE	.	.	.	TRUE
chr5_145500674_145501175	chr5	145500674	145501175	334445	PRELID2	PRELID2	TRUE	.	.	.	.
chr5_145509519_145510020	chr5	145509519	145510020	325600	PRELID2	PRELID2	TRUE	.	.	.	TRUE
chr5_145531227_145531863	chr5	145531227	145531863	303824	PRELID2	PRELID2	TRUE	.	.	.	TRUE
chr5_145543967_145544547	chr5	145543967	145544547	291112	PRELID2	PRELID2	TRUE	.	.	.	TRUE
chr5_145553089_145553590	chr5	145553089	145553590	282030	PRELID2	PRELID2	TRUE	.	.	.	.
chr5_145558914_145559415	chr5	145558914	145559415	276205	PRELID2	PRELID2	TRUE	.	.	.	.
chr5_145586855_145587356	chr5	145586855	145587356	248264	PRELID2	PRELID2	TRUE	.	.	TRUE	.
chr5_145587604_145588105	chr5	145587604	145588105	247515	PRELID2	PRELID2	TRUE	.	.	.	TRUE
chr5_145595773_145596274	chr5	145595773	145596274	239346	PRELID2	PRELID2	TRUE	.	.	.	.
chr5_145661331_145661832	chr5	145661331	145661832	173788	PRELID2	PRELID2	TRUE	.	.	.	TRUE
chr5_145668597_145669122	chr5	145668597	145669122	166510	PRELID2	PRELID2	TRUE	.	.	.	.
chr5_145681544_145682045	chr5	145681544	145682045	153575	PRELID2	PRELID2	TRUE	.	.	.	.
chr5_147822613_147823150	chr5	147822613	147823150	16350	SPINK1	SPINK1	TRUE	.	.	.	.
chr5_151095067_151095801	chr5	151095067	151095801	-7774	TNIP1	TNIP1	TRUE	.	.	TRUE	.
chr5_157026983_157027484	chr5	157026983	157027484	31008	HAVCR1	HAVCR1	TRUE	.	.	.	.
chr5_170745505_170746006	chr5	170745505	170746006	-37964	GABRP	GABRP	TRUE	.	.	TRUE	.
chr5_170752212_170752713	chr5	170752212	170752713	-31257	GABRP	GABRP	TRUE	.	.	TRUE	.
chr5_180466945_180467446	chr5	180466945	180467446	-27204	CNOT6	CNOT6	TRUE	.	.	TRUE	.
chr5_180468836_180469337	chr5	180468836	180469337	-25313	CNOT6	CNOT6	TRUE	.	.	.	.
chr5_180470901_180471402	chr5	180470901	180471402	-23248	CNOT6	CNOT6	TRUE	.	.	.	.
chr5_181207510_181208011	chr5	181207510	181208011	-2467	TRIM7	TRIM7	TRUE	.	.	.	.
chr5_181281240_181281741	chr5	181281240	181281741	20278	TRIM52-AS1	TRIM52-AS1	TRUE	.	.	.	.
chr6_1283488_1283989	chr6	1283488	1283989	-28702	FOXQ1	FOXQ1	TRUE	.	.	.	.
chr6_1296048_1296549	chr6	1296048	1296549	-16142	FOXQ1	FOXQ1	TRUE	.	.	.	.
chr6_2791146_2791647	chr6	2791146	2791647	-21066	MYLK4	MYLK4	TRUE	.	.	.	.
chr6_2793795_2794296	chr6	2793795	2794296	-23715	MYLK4	MYLK4	TRUE	.	.	TRUE	.
chr6_2809979_2810669	chr6	2809979	2810669	31725	SERPINB1	SERPINB1	TRUE	.	.	.	TRUE
chr6_3899956_3900457	chr6	3899956	3900457	50840	FAM50B	FAM50B	TRUE	.	.	.	TRUE
chr6_3906454_3906955	chr6	3906454	3906955	57338	FAM50B	FAM50B	TRUE	.	.	TRUE	.
chr6_3911798_3912299	chr6	3911798	3912299	62682	FAM50B	FAM50B	TRUE	.	.	.	TRUE
chr6_4008273_4008774	chr6	4008273	4008774	-12812	PRPF4B	PRPF4B	TRUE	.	.	.	.
chr6_5891755_5892527	chr6	5891755	5892527	111903	NRN1	NRN1	TRUE	.	.	TRUE	.
chr6_12008760_12009318	chr6	12008760	12009318	-3452	HIVEP1	HIVEP1	TRUE	.	.	TRUE	.
chr6_26118901_26119402	chr6	26118901	26119402	4753	HIST1H2BC	HIST1H2BC	TRUE	.	.	.	.
chr6_26126036_26126537	chr6	26126036	26126537	2141	HIST1H2AC	HIST1H2AC	TRUE	.	.	.	.
chr6_26195232_26195733	chr6	26195232	26195733	3811	HIST1H3D	HIST1H3D	TRUE	.	.	.	.
chr6_26205798_26206299	chr6	26205798	26206299	1403	HIST1H4E	HIST1H4E	TRUE	.	.	.	.
chr6_26232931_26233432	chr6	26232931	26233432	1807	HIST1H1D	HIST1H1D	TRUE	.	.	.	.
chr6_27096734_27097313	chr6	27096734	27097313	35773	HIST1H2BJ	HIST1H2BJ	TRUE	.	.	.	.
chr6_27126993_27127506	chr6	27126993	27127506	5547	HIST1H2BJ	HIST1H2BJ	TRUE	.	.	TRUE	.
chr6_27230407_27230908	chr6	27230407	27230908	-17066	PRSS16	PRSS16	TRUE	.	.	.	TRUE
chr6_27505440_27506142	chr6	27505440	27506142	-32673	ZNF184	ZNF184	TRUE	.	.	.	.
chr6_27895406_27895907	chr6	27895406	27895907	2231	HIST1H2BO	HIST1H2BO	TRUE	.	.	.	TRUE
chr6_27902773_27903350	chr6	27902773	27903350	9335	OR2B2	OR2B2	TRUE	.	.	.	.
chr6_36127421_36127922	chr6	36127421	36127922	-2813	MAPK13	MAPK13	TRUE	.	.	.	TRUE
chr6_37423627_37424149	chr6	37423627	37424149	-9243	CMTR1	CMTR1	TRUE	.	.	TRUE	.
chr6_42093907_42094408	chr6	42093907	42094408	43644	TAF8	TAF8	TRUE	.	.	TRUE	.
chr6_42204196_42204697	chr6	42204196	42204697	-9490	GUCA1B	GUCA1B	TRUE	.	.	.	TRUE
chr6_43334400_43334901	chr6	43334400	43334901	-25858	CRIP3	CRIP3	TRUE	.	.	.	.
chr6_44096631_44097132	chr6	44096631	44097132	-22229	LOC101929705	LOC101929705	TRUE	.	.	.	.
chr6_44100010_44100511	chr6	44100010	44100511	-25608	LOC101929705	LOC101929705	TRUE	.	.	.	.
chr6_44111822_44112361	chr6	44111822	44112361	14176	MRPL14	MRPL14	TRUE	.	.	.	.
chr6_45608484_45608985	chr6	45608484	45608985	186157	RUNX2	RUNX2	TRUE	.	.	TRUE	.
chr6_57069852_57070353	chr6	57069852	57070353	-19908	ZNF451	ZNF451	TRUE	.	.	TRUE	.
chr6_71334724_71335225	chr6	71334724	71335225	42057	MIR30C2	MIR30C2	TRUE	.	.	.	TRUE
chr6_71365731_71366232	chr6	71365731	71366232	11050	MIR30C2	MIR30C2	TRUE	.	.	.	TRUE
chr6_71386102_71386603	chr6	71386102	71386603	-9321	MIR30C2	MIR30C2	TRUE	.	.	.	TRUE
chr6_73422338_73422839	chr6	73422338	73422839	28026	DDX43	DDX43	TRUE	.	.	TRUE	.
chr6_79570127_79570883	chr6	79570127	79570883	-33075	LCA5	LCA5	TRUE	.	.	.	TRUE
chr6_80438707_80439208	chr6	80438707	80439208	332347	BCKDHB	BCKDHB	TRUE	.	.	TRUE	.
chr6_80439995_80440685	chr6	80439995	80440685	333730	BCKDHB	BCKDHB	TRUE	.	.	TRUE	TRUE
chr6_80454160_80454661	chr6	80454160	80454661	347800	BCKDHB	BCKDHB	TRUE	.	.	.	TRUE
chr6_80457240_80457818	chr6	80457240	80457818	350919	BCKDHB	BCKDHB	TRUE	.	.	TRUE	TRUE
chr6_80468281_80468782	chr6	80468281	80468782	361921	BCKDHB	BCKDHB	TRUE	.	.	.	.
chr6_87276531_87277056	chr6	87276531	87277056	-45795	SMIM8	SMIM8	TRUE	.	.	.	TRUE
chr6_106180174_106180675	chr6	106180174	106180675	81562	PRDM1	PRDM1	TRUE	.	.	TRUE	.
chr6_106360319_106361121	chr6	106360319	106361121	-34900	ATG5	ATG5	TRUE	.	.	TRUE	.
chr6_106373037_106373538	chr6	106373037	106373538	-47467	ATG5	ATG5	TRUE	.	.	.	TRUE
chr6_106381789_106382290	chr6	106381789	106382290	-56219	ATG5	ATG5	TRUE	.	.	TRUE	TRUE
chr6_106411690_106412260	chr6	106411690	106412260	45273	LOC105377924	LOC105377924	TRUE	.	.	TRUE	.
chr6_111228505_111229006	chr6	111228505	111229006	-30524	MFSD4B	MFSD4B	TRUE	.	.	TRUE	TRUE
chr6_126180521_126181022	chr6	126180521	126181022	-159018	CENPW	CENPW	TRUE	.	.	.	TRUE
chr6_126181647_126182148	chr6	126181647	126182148	-157892	CENPW	CENPW	TRUE	.	.	.	.
chr6_126182576_126183077	chr6	126182576	126183077	-156963	CENPW	CENPW	TRUE	.	.	TRUE	.
chr6_126199420_126199921	chr6	126199420	126199921	-140119	CENPW	CENPW	TRUE	.	.	.	.
chr6_126263875_126264376	chr6	126263875	126264376	-75664	CENPW	CENPW	TRUE	.	.	TRUE	.
chr6_126302133_126302634	chr6	126302133	126302634	-37406	CENPW	CENPW	TRUE	.	.	.	.
chr6_126312183_126312694	chr6	126312183	126312694	-27351	CENPW	CENPW	TRUE	.	.	.	TRUE
chr6_138577380_138577881	chr6	138577380	138577881	-5099	NHSL1	NHSL1	TRUE	.	.	.	TRUE
chr6_138588720_138589221	chr6	138588720	138589221	-16439	NHSL1	NHSL1	TRUE	.	.	.	.
chr6_138590824_138591325	chr6	138590824	138591325	-18543	NHSL1	NHSL1	TRUE	.	.	.	.
chr6_138593101_138593602	chr6	138593101	138593602	-20820	NHSL1	NHSL1	TRUE	.	.	.	TRUE
chr6_138622900_138623401	chr6	138622900	138623401	-50619	NHSL1	NHSL1	TRUE	.	.	.	.
chr6_138654651_138655152	chr6	138654651	138655152	-36767	FLJ46906	FLJ46906	TRUE	.	.	.	TRUE
chr6_141736038_141736539	chr6	141736038	141736539	352511	NMBR	NMBR	TRUE	.	.	.	TRUE
chr6_141746226_141746727	chr6	141746226	141746727	342323	NMBR	NMBR	TRUE	.	.	TRUE	.
chr6_149498989_149499556	chr6	149498989	149499556	-14260	ZC3H12D	ZC3H12D	TRUE	.	.	TRUE	TRUE
chr6_154387354_154387855	chr6	154387354	154387855	-30838	IPCEF1	IPCEF1	TRUE	.	.	.	TRUE
chr6_154390095_154390596	chr6	154390095	154390596	-33579	IPCEF1	IPCEF1	TRUE	.	.	TRUE	TRUE
chr6_154961705_154962206	chr6	154961705	154962206	108595	MIR1273C	MIR1273C	TRUE	.	.	.	.
chr6_154962717_154963218	chr6	154962717	154963218	109607	MIR1273C	MIR1273C	TRUE	.	.	.	TRUE
chr6_158242514_158243017	chr6	158242514	158243017	-69895	TULP4	TULP4	TRUE	.	.	.	.
chr6_158245748_158246249	chr6	158245748	158246249	-66662	TULP4	TULP4	TRUE	.	.	.	.
chr6_158286947_158287448	chr6	158286947	158287448	-25463	TULP4	TULP4	TRUE	.	.	.	.
chr6_158289988_158290489	chr6	158289988	158290489	-22422	TULP4	TULP4	TRUE	.	.	.	.
chr6_158290632_158291133	chr6	158290632	158291133	-21778	TULP4	TULP4	TRUE	.	.	.	.
chr6_158291958_158292459	chr6	158291958	158292459	-20452	TULP4	TULP4	TRUE	.	.	.	TRUE
chr6_158296365_158296866	chr6	158296365	158296866	-16045	TULP4	TULP4	TRUE	.	.	TRUE	.
chr6_158300377_158300878	chr6	158300377	158300878	-12033	TULP4	TULP4	TRUE	.	.	TRUE	TRUE
chr6_158303006_158303507	chr6	158303006	158303507	-9404	TULP4	TULP4	TRUE	.	.	.	TRUE
chr6_159655366_159655867	chr6	159655366	159655867	37712	SOD2	SOD2	TRUE	.	.	TRUE	.
chr6_166989605_166990106	chr6	166989605	166990106	8057	MIR3939	MIR3939	TRUE	.	.	TRUE	.
chr6_167318263_167318764	chr6	167318263	167318764	-6573	TTLL2	TTLL2	TRUE	.	.	.	TRUE
chr6_167815569_167816087	chr6	167815569	167816087	10968	AFDN-DT	AFDN-DT	TRUE	.	.	TRUE	.
chr7_264740_265241	chr7	264740	265241	72021	FAM20C	FAM20C	TRUE	.	.	TRUE	.
chr7_2437071_2437572	chr7	2437071	2437572	33761	CHST12	CHST12	TRUE	.	.	.	.
chr7_5437973_5438474	chr7	5437973	5438474	-9296	LOC100129484	LOC100129484	TRUE	.	.	.	.
chr7_5450627_5451128	chr7	5450627	5451128	-21950	LOC100129484	LOC100129484	TRUE	.	.	TRUE	.
chr7_7000918_7001419	chr7	7000918	7001419	65877	MIR3683	MIR3683	TRUE	.	.	.	.
chr7_7103283_7103784	chr7	7103283	7103784	-6747	LOC100131257	LOC100131257	TRUE	.	.	.	.
chr7_7114738_7115342	chr7	7114738	7115342	-18254	LOC100131257	LOC100131257	TRUE	.	.	.	.
chr7_7122655_7123156	chr7	7122655	7123156	-26119	LOC100131257	LOC100131257	TRUE	.	.	.	.
chr7_7136438_7136939	chr7	7136438	7136939	-39902	LOC100131257	LOC100131257	TRUE	.	.	.	TRUE
chr7_7154233_7154734	chr7	7154233	7154734	-28132	C1GALT1	C1GALT1	TRUE	.	.	TRUE	.
chr7_8351709_8352210	chr7	8351709	8352210	-81996	NXPH1	NXPH1	TRUE	.	.	TRUE	.
chr7_8365424_8365925	chr7	8365424	8365925	-68281	NXPH1	NXPH1	TRUE	.	.	.	TRUE
chr7_8371628_8372129	chr7	8371628	8372129	-62077	NXPH1	NXPH1	TRUE	.	.	TRUE	.
chr7_8379196_8379697	chr7	8379196	8379697	-54509	NXPH1	NXPH1	TRUE	.	.	.	.
chr7_8386896_8387397	chr7	8386896	8387397	-46809	NXPH1	NXPH1	TRUE	.	.	.	TRUE
chr7_8389793_8390317	chr7	8389793	8390317	-43900	NXPH1	NXPH1	TRUE	.	.	TRUE	.
chr7_12931330_12931831	chr7	12931330	12931831	244294	ARL4A	ARL4A	TRUE	.	.	.	.
chr7_12941488_12941989	chr7	12941488	12941989	254452	ARL4A	ARL4A	TRUE	.	.	.	.
chr7_12942530_12943084	chr7	12942530	12943084	255521	ARL4A	ARL4A	TRUE	.	.	.	.
chr7_12951432_12951933	chr7	12951432	12951933	264396	ARL4A	ARL4A	TRUE	.	.	.	TRUE
chr7_13016298_13016799	chr7	13016298	13016799	329262	ARL4A	ARL4A	TRUE	.	.	.	.
chr7_13017204_13017705	chr7	13017204	13017705	330168	ARL4A	ARL4A	TRUE	.	.	.	TRUE
chr7_13104057_13104574	chr7	13104057	13104574	417029	ARL4A	ARL4A	TRUE	.	.	.	.
chr7_13376658_13377159	chr7	13376658	13377159	609606	ETV1	ETV1	TRUE	.	.	.	.
chr7_13414461_13414962	chr7	13414461	13414962	571803	ETV1	ETV1	TRUE	.	.	.	.
chr7_13422150_13422651	chr7	13422150	13422651	564114	ETV1	ETV1	TRUE	.	.	.	.
chr7_13496898_13497399	chr7	13496898	13497399	489366	ETV1	ETV1	TRUE	.	.	.	.
chr7_13525010_13525511	chr7	13525010	13525511	461254	ETV1	ETV1	TRUE	.	.	.	.
chr7_13597929_13598430	chr7	13597929	13598430	388335	ETV1	ETV1	TRUE	.	.	.	TRUE
chr7_13641681_13642182	chr7	13641681	13642182	344583	ETV1	ETV1	TRUE	.	.	.	.
chr7_13722348_13722849	chr7	13722348	13722849	263916	ETV1	ETV1	TRUE	.	.	.	.
chr7_13724827_13725328	chr7	13724827	13725328	261437	ETV1	ETV1	TRUE	.	.	.	TRUE
chr7_13806274_13806775	chr7	13806274	13806775	179990	ETV1	ETV1	TRUE	.	.	TRUE	.
chr7_16916055_16916556	chr7	16916055	16916556	-34316	AGR3	AGR3	TRUE	.	.	.	TRUE
chr7_16926224_16926725	chr7	16926224	16926725	-44485	AGR3	AGR3	TRUE	.	.	.	TRUE
chr7_17005182_17005683	chr7	17005182	17005683	-123443	AGR3	AGR3	TRUE	.	.	.	.
chr7_17008985_17009486	chr7	17008985	17009486	-127246	AGR3	AGR3	TRUE	.	.	.	.
chr7_17020926_17021427	chr7	17020926	17021427	-139187	AGR3	AGR3	TRUE	.	.	.	.
chr7_17054345_17054846	chr7	17054345	17054846	-172606	AGR3	AGR3	TRUE	.	.	.	.
chr7_29639436_29639937	chr7	29639436	29639937	41142	MIR550A3	MIR550A3	TRUE	.	.	.	.
chr7_29640139_29640640	chr7	29640139	29640640	40439	MIR550A3	MIR550A3	TRUE	.	.	.	.
chr7_30412997_30413498	chr7	30412997	30413498	22362	LINC01176	LINC01176	TRUE	.	.	.	.
chr7_30510044_30510545	chr7	30510044	30510545	-5453	GGCT	GGCT	TRUE	.	.	.	.
chr7_30519080_30519581	chr7	30519080	30519581	-14489	GGCT	GGCT	TRUE	.	.	.	.
chr7_30522125_30522626	chr7	30522125	30522626	-17534	GGCT	GGCT	TRUE	.	.	.	TRUE
chr7_33697860_33698361	chr7	33697860	33698361	-206801	BMPER	BMPER	TRUE	.	.	.	TRUE
chr7_33706706_33707207	chr7	33706706	33707207	-197955	BMPER	BMPER	TRUE	.	.	.	.
chr7_34174853_34175537	chr7	34174853	34175537	270284	BMPER	BMPER	TRUE	.	.	TRUE	.
chr7_35630506_35631007	chr7	35630506	35631007	64406	HERPUD2	HERPUD2	TRUE	.	.	.	TRUE
chr7_43059165_43059666	chr7	43059165	43059666	-53184	HECW1	HECW1	TRUE	.	.	TRUE	.
chr7_44562198_44562699	chr7	44562198	44562699	12090	DDX56	DDX56	TRUE	.	.	TRUE	TRUE
chr7_47266509_47267268	chr7	47266509	47267268	197915	SNORD151	SNORD151	TRUE	.	.	TRUE	.
chr7_55469334_55469835	chr7	55469334	55469835	57296	VOPP1	VOPP1	TRUE	.	.	.	.
chr7_64515273_64515774	chr7	64515273	64515774	47604	ZNF680	ZNF680	TRUE	.	.	.	TRUE
chr7_64950565_64951066	chr7	64950565	64951066	40221	ZNF117	ZNF117	TRUE	.	.	.	.
chr7_64959275_64959776	chr7	64959275	64959776	31511	ZNF117	ZNF117	TRUE	.	.	TRUE	.
chr7_67359875_67360376	chr7	67359875	67360376	24149	LINC01372	LINC01372	TRUE	.	.	.	.
chr7_73767654_73768155	chr7	73767654	73768155	2366	CLDN3	CLDN3	TRUE	.	.	.	.
chr7_73787195_73787696	chr7	73787195	73787696	-17175	CLDN3	CLDN3	TRUE	.	.	TRUE	.
chr7_73791573_73792074	chr7	73791573	73792074	-21553	CLDN3	CLDN3	TRUE	.	.	.	.
chr7_73792647_73793148	chr7	73792647	73793148	-22627	CLDN3	CLDN3	TRUE	.	.	TRUE	.
chr7_73793462_73794026	chr7	73793462	73794026	-23474	CLDN3	CLDN3	TRUE	.	.	.	.
chr7_73827916_73828593	chr7	73827916	73828593	-2609	CLDN4	CLDN4	TRUE	.	.	.	.
chr7_77655324_77655825	chr7	77655324	77655825	40691	APTR	APTR	TRUE	.	.	TRUE	.
chr7_90242648_90243149	chr7	90242648	90243149	-2276	CFAP69	CFAP69	TRUE	.	.	.	.
chr7_93591377_93591878	chr7	93591377	93591878	-16897	CALCR	CALCR	TRUE	.	.	TRUE	TRUE
chr7_93601347_93601848	chr7	93601347	93601848	-26867	CALCR	CALCR	TRUE	.	.	.	.
chr7_94561830_94562331	chr7	94561830	94562331	52222	CASD1	CASD1	TRUE	.	.	.	.
chr7_94577307_94577808	chr7	94577307	94577808	67699	CASD1	CASD1	TRUE	.	.	.	.
chr7_98276176_98276798	chr7	98276176	98276798	-5180	BRI3	BRI3	TRUE	.	.	.	.
chr7_103152842_103153343	chr7	103152842	103153343	-3970	NAPEPLD	NAPEPLD	TRUE	.	.	.	.
chr7_104943510_104944155	chr7	104943510	104944155	-17187	LHFPL3-AS2	LHFPL3-AS2	TRUE	.	.	.	.
chr7_106774702_106775204	chr7	106774702	106775204	-90325	PIK3CG	PIK3CG	TRUE	.	.	.	TRUE
chr7_106775554_106776055	chr7	106775554	106776055	-89474	PIK3CG	PIK3CG	TRUE	.	.	TRUE	TRUE
chr7_106779723_106780349	chr7	106779723	106780349	-85242	PIK3CG	PIK3CG	TRUE	.	.	TRUE	.
chr7_128459265_128459766	chr7	128459265	128459766	3685	HILPDA	HILPDA	TRUE	.	.	.	.
chr7_134078913_134079414	chr7	134078913	134079414	-48189	LRGUK	LRGUK	TRUE	.	.	TRUE	.
chr7_134083862_134084363	chr7	134083862	134084363	-43240	LRGUK	LRGUK	TRUE	.	.	TRUE	TRUE
chr7_135178355_135178856	chr7	135178355	135178856	-7779	CYREN	CYREN	TRUE	.	.	.	.
chr7_135179191_135179738	chr7	135179191	135179738	-8638	CYREN	CYREN	TRUE	.	.	TRUE	.
chr7_141976038_141976649	chr7	141976038	141976649	-2570	TAS2R38	TAS2R38	TRUE	.	.	.	.
chr7_141985710_141986211	chr7	141985710	141986211	-9919	MGAM	MGAM	TRUE	.	.	TRUE	.
chr7_150876826_150877480	chr7	150876826	150877480	24676	AOC1	AOC1	TRUE	.	.	TRUE	.
chr8_486569_487081	chr8	486569	487081	58020	TDRP	TDRP	TRUE	.	.	.	TRUE
chr8_17802685_17803186	chr8	17802685	17803186	-2018	MTUS1	MTUS1	TRUE	.	.	.	.
chr8_23421317_23421818	chr8	23421317	23421818	-17358	LOXL2	LOXL2	TRUE	.	.	TRUE	TRUE
chr8_25509753_25510254	chr8	25509753	25510254	51072	CDCA2	CDCA2	TRUE	.	.	TRUE	.
chr8_26451072_26451585	chr8	26451072	26451585	60938	BNIP3L	BNIP3L	TRUE	.	.	TRUE	TRUE
chr8_32927686_32928187	chr8	32927686	32928187	206183	NRG1	NRG1	TRUE	.	.	.	.
chr8_37591094_37591595	chr8	37591094	37591595	-69958	LINC01605	LINC01605	TRUE	.	.	.	TRUE
chr8_37594423_37594924	chr8	37594423	37594924	-73287	LINC01605	LINC01605	TRUE	.	.	.	TRUE
chr8_37597018_37597519	chr8	37597018	37597519	-75882	LINC01605	LINC01605	TRUE	.	.	.	.
chr8_37599695_37600196	chr8	37599695	37600196	-78559	LINC01605	LINC01605	TRUE	.	.	.	.
chr8_38067057_38067558	chr8	38067057	38067558	36805	EIF4EBP1	EIF4EBP1	TRUE	.	.	.	.
chr8_43124706_43125207	chr8	43124706	43125207	-15493	HGSNAT	HGSNAT	TRUE	.	.	.	TRUE
chr8_62078665_62079185	chr8	62078665	62079185	-170017	NKAIN3	NKAIN3	TRUE	.	.	TRUE	TRUE
chr8_62102578_62103079	chr8	62102578	62103079	-146114	NKAIN3	NKAIN3	TRUE	.	.	TRUE	.
chr8_62139533_62140034	chr8	62139533	62140034	-109159	NKAIN3	NKAIN3	TRUE	.	.	TRUE	.
chr8_72107987_72108488	chr8	72107987	72108488	-32653	TRPA1	TRPA1	TRUE	.	.	.	.
chr8_74394439_74394953	chr8	74394439	74394953	44313	GDAP1	GDAP1	TRUE	.	.	TRUE	TRUE
chr8_74395359_74395860	chr8	74395359	74395860	45226	GDAP1	GDAP1	TRUE	.	.	TRUE	.
chr8_74402125_74402626	chr8	74402125	74402626	51992	GDAP1	GDAP1	TRUE	.	.	TRUE	.
chr8_74406157_74406658	chr8	74406157	74406658	56024	GDAP1	GDAP1	TRUE	.	.	.	TRUE
chr8_75146027_75146528	chr8	75146027	75146528	132204	CASC9	CASC9	TRUE	.	.	.	TRUE
chr8_75149045_75149546	chr8	75149045	75149546	129186	CASC9	CASC9	TRUE	.	.	.	.
chr8_78840487_78840988	chr8	78840487	78840988	-35214	IL7	IL7	TRUE	.	.	.	TRUE
chr8_78854215_78854716	chr8	78854215	78854716	-48942	IL7	IL7	TRUE	.	.	TRUE	.
chr8_78856273_78856774	chr8	78856273	78856774	-51000	IL7	IL7	TRUE	.	.	.	TRUE
chr8_78859083_78859584	chr8	78859083	78859584	-53810	IL7	IL7	TRUE	.	.	TRUE	.
chr8_78884236_78884737	chr8	78884236	78884737	-78963	IL7	IL7	TRUE	.	.	.	.
chr8_78900213_78900714	chr8	78900213	78900714	-94940	IL7	IL7	TRUE	.	.	.	.
chr8_78924683_78925191	chr8	78924683	78925191	-119414	IL7	IL7	TRUE	.	.	.	TRUE
chr8_78947616_78948117	chr8	78947616	78948117	-142343	IL7	IL7	TRUE	.	.	.	TRUE
chr8_89258555_89259056	chr8	89258555	89259056	498906	LOC101929709	LOC101929709	TRUE	.	.	.	TRUE
chr8_89322230_89322731	chr8	89322230	89322731	435231	LOC101929709	LOC101929709	TRUE	.	.	.	TRUE
chr8_89611522_89612203	chr8	89611522	89612203	145849	LOC101929709	LOC101929709	TRUE	.	.	.	TRUE
chr8_89704971_89705472	chr8	89704971	89705472	52490	LOC101929709	LOC101929709	TRUE	.	.	TRUE	TRUE
chr8_89889352_89889853	chr8	89889352	89889853	-12266	OSGIN2	OSGIN2	TRUE	.	.	.	TRUE
chr8_98997821_98998322	chr8	98997821	98998322	-15195	VPS13B	VPS13B	TRUE	.	.	.	TRUE
chr8_98999765_99000266	chr8	98999765	99000266	-13251	VPS13B	VPS13B	TRUE	.	.	.	.
chr8_101166992_101167493	chr8	101166992	101167493	38490	ZNF706	ZNF706	TRUE	.	.	TRUE	TRUE
chr8_101168294_101168795	chr8	101168294	101168795	37188	ZNF706	ZNF706	TRUE	.	.	.	.
chr8_101194872_101195373	chr8	101194872	101195373	10610	ZNF706	ZNF706	TRUE	.	.	.	.
chr8_103445464_103445965	chr8	103445464	103445965	-30379	SLC25A32	SLC25A32	TRUE	.	.	.	TRUE
chr8_109228992_109229592	chr8	109228992	109229592	100641	NUDCD1	NUDCD1	TRUE	.	.	.	TRUE
chr8_117713394_117713895	chr8	117713394	117713895	192931	MED30	MED30	TRUE	.	.	TRUE	.
chr8_117731586_117732087	chr8	117731586	117732087	189077	SNORD168	SNORD168	TRUE	.	.	.	.
chr8_117752335_117752836	chr8	117752335	117752836	168328	SNORD168	SNORD168	TRUE	.	.	.	.
chr8_117785149_117785650	chr8	117785149	117785650	135514	SNORD168	SNORD168	TRUE	.	.	.	TRUE
chr8_118811906_118812407	chr8	118811906	118812407	139988	TNFRSF11B	TNFRSF11B	TRUE	.	.	.	.
chr8_118877957_118878882	chr8	118877957	118878882	73725	TNFRSF11B	TNFRSF11B	TRUE	.	.	.	TRUE
chr8_123453601_123454102	chr8	123453601	123454102	37126	WDYHV1	WDYHV1	TRUE	.	.	.	TRUE
chr8_123461056_123461557	chr8	123461056	123461557	44581	WDYHV1	WDYHV1	TRUE	.	.	.	TRUE
chr8_123462766_123463267	chr8	123462766	123463267	46291	WDYHV1	WDYHV1	TRUE	.	.	.	.
chr8_123479581_123480082	chr8	123479581	123480082	52312	FBXO32	FBXO32	TRUE	.	.	.	.
chr8_124294670_124295171	chr8	124294670	124295171	-47522	LOC101927588	LOC101927588	TRUE	.	.	TRUE	.
chr8_126609473_126609974	chr8	126609473	126609974	-51257	FAM84B	LRATD2	TRUE	.	.	.	TRUE
chr8_126804999_126805500	chr8	126804999	126805500	-207905	PCAT1	PCAT1	TRUE	.	.	TRUE	.
chr8_127035489_127036159	chr8	127035489	127036159	22670	PCAT1	PCAT1	TRUE	.	.	TRUE	TRUE
chr8_127038551_127039052	chr8	127038551	127039052	25647	PCAT1	PCAT1	TRUE	.	.	.	TRUE
chr8_127041679_127042180	chr8	127041679	127042180	28775	PCAT1	PCAT1	TRUE	.	.	.	TRUE
chr8_127106014_127106515	chr8	127106014	127106515	-24043	PCAT2	PCAT2	TRUE	.	.	.	.
chr8_127114390_127114891	chr8	127114390	127114891	-32419	PCAT2	PCAT2	TRUE	.	.	.	TRUE
chr8_127137193_127137694	chr8	127137193	127137694	-55222	PCAT2	PCAT2	TRUE	.	.	.	.
chr8_127178450_127178951	chr8	127178450	127178951	18927	CASC19	CASC19	TRUE	.	.	.	.
chr8_127200582_127201083	chr8	127200582	127201083	-3205	CASC19	CASC19	TRUE	.	.	.	.
chr8_143899602_143900103	chr8	143899602	143900103	-21388	EPPK1	EPPK1	TRUE	.	.	TRUE	.
chr8_143902411_143902912	chr8	143902411	143902912	-24197	EPPK1	EPPK1	TRUE	.	.	.	.
chr9_2771037_2771610	chr9	2771037	2771610	53797	KCNV2	KCNV2	TRUE	.	.	.	.
chr9_5608559_5609060	chr9	5608559	5609060	-20310	RIC1	RIC1	TRUE	.	.	.	.
chr9_5621884_5622385	chr9	5621884	5622385	-6985	RIC1	RIC1	TRUE	.	.	.	TRUE
chr9_12850572_12851073	chr9	12850572	12851073	-36433	LURAP1L-AS1	LURAP1L-AS1	TRUE	.	.	.	.
chr9_12854175_12854676	chr9	12854175	12854676	-40036	LURAP1L-AS1	LURAP1L-AS1	TRUE	.	.	.	TRUE
chr9_12859813_12860329	chr9	12859813	12860329	-45682	LURAP1L-AS1	LURAP1L-AS1	TRUE	.	.	TRUE	TRUE
chr9_12878257_12878821	chr9	12878257	12878821	-64150	LURAP1L-AS1	LURAP1L-AS1	TRUE	.	.	.	.
chr9_21873829_21874330	chr9	21873829	21874330	71443	MTAP	MTAP	TRUE	.	.	.	TRUE
chr9_21919501_21920002	chr9	21919501	21920002	-47388	CDKN2A-DT	CDKN2A-DT	TRUE	.	.	.	.
chr9_21933170_21933671	chr9	21933170	21933671	-33719	CDKN2A-DT	CDKN2A-DT	TRUE	.	.	.	TRUE
chr9_36296597_36297098	chr9	36296597	36297098	-19791	GNE	GNE	TRUE	.	.	.	.
chr9_36407196_36407697	chr9	36407196	36407697	-6248	RNF38	RNF38	TRUE	.	.	.	.
chr9_36419707_36420211	chr9	36419707	36420211	-18761	RNF38	RNF38	TRUE	.	.	.	TRUE
chr9_38087891_38088392	chr9	38087891	38088392	-18928	SHB	SHB	TRUE	.	.	.	.
chr9_40873845_40874346	chr9	40873845	40874346	54997	MIR1299	MIR1299	TRUE	.	.	TRUE	.
chr9_40915490_40915991	chr9	40915490	40915991	13352	MIR1299	MIR1299	TRUE	.	.	TRUE	.
chr9_72883841_72884342	chr9	72883841	72884342	-9982	LINC01474	LINC01474	TRUE	.	.	TRUE	.
chr9_72888990_72889491	chr9	72888990	72889491	-15131	LINC01474	LINC01474	TRUE	.	.	.	.
chr9_76571541_76572042	chr9	76571541	76572042	71158	GCNT1	GCNT1	TRUE	.	.	TRUE	.
chr9_89483840_89484341	chr9	89483840	89484341	-4394	SEMA4D	SEMA4D	TRUE	.	.	TRUE	.
chr9_89489883_89490384	chr9	89489883	89490384	-10437	SEMA4D	SEMA4D	TRUE	.	.	.	.
chr9_89494101_89494602	chr9	89494101	89494602	-14655	SEMA4D	SEMA4D	TRUE	.	.	TRUE	.
chr9_89497525_89498026	chr9	89497525	89498026	-18079	SEMA4D	SEMA4D	TRUE	.	.	TRUE	.
chr9_91197180_91197681	chr9	91197180	91197681	78368	LINC00484	LINC00484	TRUE	.	.	.	.
chr9_91197810_91198311	chr9	91197810	91198311	78998	LINC00484	LINC00484	TRUE	.	.	.	TRUE
chr9_91211315_91211834	chr9	91211315	91211834	92512	LINC00484	LINC00484	TRUE	.	.	TRUE	.
chr9_91212545_91213046	chr9	91212545	91213046	93733	LINC00484	LINC00484	TRUE	.	.	.	.
chr9_96856733_96857234	chr9	96856733	96857234	-2495	ZNF782	ZNF782	TRUE	.	.	.	.
chr9_96858627_96859128	chr9	96858627	96859128	-4389	ZNF782	ZNF782	TRUE	.	.	.	.
chr9_101567185_101567686	chr9	101567185	101567686	27566	PPP3R2	PPP3R2	TRUE	.	.	.	.
chr9_106860552_106861053	chr9	106860552	106861053	-2295	ZNF462	ZNF462	TRUE	.	.	.	.
chr9_107341023_107341524	chr9	107341023	107341524	56504	RAD23B	RAD23B	TRUE	.	.	TRUE	.
chr9_111678207_111678708	chr9	111678207	111678708	16886	GNG10	GNG10	TRUE	.	.	.	.
chr9_111805671_111806289	chr9	111805671	111806289	-10972	C9orf84	SHOC1	TRUE	.	.	.	TRUE
chr9_112037596_112038097	chr9	112037596	112038097	105746	MIR4668	MIR4668	TRUE	.	.	TRUE	.
chr9_112200617_112201118	chr9	112200617	112201118	-25570	SUSD1	SUSD1	TRUE	.	.	TRUE	TRUE
chr9_117720533_117721034	chr9	117720533	117721034	16608	TLR4	TLR4	TRUE	.	.	.	TRUE
chr9_129157256_129157757	chr9	129157256	129157757	20755	IER5L	IER5L	TRUE	.	.	.	TRUE
chr9_129334069_129334665	chr9	129334069	129334665	-2556	LINC01503	LINC01503	TRUE	.	.	TRUE	TRUE
chr9_131406578_131407079	chr9	131406578	131407079	-23262	PRRC2B	PRRC2B	TRUE	.	.	.	.
chr9_136882158_136882659	chr9	136882158	136882659	-4105	TRAF2	TRAF2	TRUE	.	.	TRUE	.
chr9_136949702_136950380	chr9	136949702	136950380	-2275	LCN12	LCN12	TRUE	.	.	TRUE	.
chr9_137237917_137238418	chr9	137237917	137238418	-3092	TUBB4B	TUBB4B	TRUE	.	.	TRUE	.
chrX_6932313_6932814	chrX	6932313	6932814	-214689	STS	STS	TRUE	.	.	TRUE	.
chrX_10900540_10901396	chrX	10900540	10901396	-67278	MID1	MID1	TRUE	.	.	.	TRUE
chrX_10939316_10939817	chrX	10939316	10939817	-105876	MID1	MID1	TRUE	.	.	.	TRUE
chrX_10974896_10975397	chrX	10974896	10975397	-136140	HCCS	HCCS	TRUE	.	.	.	.
chrX_23766326_23766827	chrX	23766326	23766827	-16582	SAT1	SAT1	TRUE	.	.	TRUE	.
chrX_45753602_45754103	chrX	45753602	45754103	-6728	MIR222	MIR222	TRUE	.	.	TRUE	.
chrX_45756464_45756965	chrX	45756464	45756965	-9590	MIR222	MIR222	TRUE	.	.	.	.
chrX_45760327_45760828	chrX	45760327	45760828	-13453	MIR222	MIR222	TRUE	.	.	TRUE	TRUE
chrX_45769996_45770497	chrX	45769996	45770497	-23122	MIR222	MIR222	TRUE	.	.	.	TRUE
chrX_45771354_45771855	chrX	45771354	45771855	-24480	MIR222	MIR222	TRUE	.	.	.	TRUE
chrX_45781814_45782315	chrX	45781814	45782315	-34940	MIR222	MIR222	TRUE	.	.	.	TRUE
chrX_45801482_45801983	chrX	45801482	45801983	49758	LOC401585	LINC02595	TRUE	.	.	.	.
chrX_45806545_45807046	chrX	45806545	45807046	44695	LOC401585	LINC02595	TRUE	.	.	.	.
chrX_45807521_45808022	chrX	45807521	45808022	43719	LOC401585	LINC02595	TRUE	.	.	.	.
chrX_45824415_45824971	chrX	45824415	45824971	26797	LOC401585	LINC02595	TRUE	.	.	.	TRUE
chrX_46485922_46486423	chrX	46485922	46486423	38983	KRBOX4	KRBOX4	TRUE	.	.	TRUE	.
chrX_49139579_49140080	chrX	49139579	49140080	-16028	GPKOW	GPKOW	TRUE	.	.	TRUE	TRUE
chrX_49148631_49149132	chrX	49148631	49149132	-13962	MAGIX	MAGIX	TRUE	.	.	TRUE	.
chrX_53160375_53160876	chrX	53160375	53160876	34863	MIR6895	MIR6895	TRUE	.	.	TRUE	TRUE
chrX_54639207_54640121	chrX	54639207	54640121	109453	GNL3L	GNL3L	TRUE	.	.	TRUE	.
chrX_57104288_57104789	chrX	57104288	57104789	17008	SPIN2B	SPIN2B	TRUE	.	.	.	.
chrX_68018784_68019285	chrX	68018784	68019285	414423	OPHN1	OPHN1	TRUE	.	.	.	.
chrX_75188508_75189009	chrX	75188508	75189009	-32418	ABCB7	ABCB7	TRUE	.	.	TRUE	.
chrX_97617069_97617570	chrX	97617069	97617570	-52784	DIAPH2-AS1	DIAPH2-AS1	TRUE	.	.	.	TRUE
chrX_100672904_100673405	chrX	100672904	100673405	28988	SRPX2	SRPX2	TRUE	.	.	.	TRUE
chrX_103404608_103405109	chrX	103404608	103405109	27677	BEX3	BEX3	TRUE	.	.	TRUE	.
chrX_129982250_129982803	chrX	129982250	129982803	-22662	BCORL1	BCORL1	TRUE	.	.	.	.
chrX_131501489_131501990	chrX	131501489	131501990	-42335	OR13H1	OR13H1	TRUE	.	.	TRUE	TRUE
chrX_131552946_131553447	chrX	131552946	131553447	9122	OR13H1	OR13H1	TRUE	.	.	TRUE	.
chrX_131565814_131566315	chrX	131565814	131566315	21990	OR13H1	OR13H1	TRUE	.	.	.	TRUE
chrX_131572325_131572826	chrX	131572325	131572826	28501	OR13H1	OR13H1	TRUE	.	.	.	.
chrX_131578653_131579154	chrX	131578653	131579154	34829	OR13H1	OR13H1	TRUE	.	.	TRUE	.
chrX_150032689_150033206	chrX	150032689	150033206	94399	LINC00894	LINC00894	TRUE	.	.	TRUE	TRUE
chrX_152897758_152898259	chrX	152897758	152898259	-16434	ZNF185	ZNF185	TRUE	.	.	TRUE	.
chr1_1124845_1125346	chr1	1124845	1125346	-8739	C1orf159	C1orf159	.	TRUE	.	TRUE	.
chr1_1157327_1158250	chr1	1157327	1158250	-9316	MIR200B	MIR200B	.	TRUE	.	TRUE	.
chr1_1782899_1783400	chr1	1782899	1783400	-3002	NADK	NADK	.	TRUE	.	TRUE	.
chr1_3483787_3484288	chr1	3483787	3484288	29454	ARHGEF16	ARHGEF16	.	TRUE	.	TRUE	.
chr1_7953935_7954466	chr1	7953935	7954466	-7454	PARK7	PARK7	.	TRUE	.	TRUE	.
chr1_10459062_10459563	chr1	10459062	10459563	9593	CORT	CORT	.	TRUE	.	.	TRUE
chr1_16158875_16159381	chr1	16158875	16159381	-3019	EPHA2	EPHA2	.	TRUE	.	TRUE	TRUE
chr1_16162315_16162816	chr1	16162315	16162816	-6456	EPHA2	EPHA2	.	TRUE	.	TRUE	.
chr1_16642287_16642788	chr1	16642287	16642788	-3037	MST1P2	MST1P2	.	TRUE	.	TRUE	.
chr1_16642928_16643429	chr1	16642928	16643429	-2396	MST1P2	MST1P2	.	TRUE	.	.	.
chr1_22105564_22106065	chr1	22105564	22106065	37212	WNT4	WNT4	.	TRUE	.	.	.
chr1_25239688_25240190	chr1	25239688	25240190	-7417	SYF2	SYF2	.	TRUE	.	TRUE	.
chr1_26876929_26877430	chr1	26876929	26877430	13199	GPN2	GPN2	.	TRUE	.	.	TRUE
chr1_26877870_26878371	chr1	26877870	26878371	12258	GPN2	GPN2	.	TRUE	.	.	.
chr1_33127121_33127676	chr1	33127121	33127676	45220	AZIN2	AZIN2	.	TRUE	.	TRUE	.
chr1_36328689_36329190	chr1	36328689	36329190	-4785	EVA1B	EVA1B	.	TRUE	.	.	.
chr1_48249825_48250326	chr1	48249825	48250326	27390	SLC5A9	SLC5A9	.	TRUE	.	.	.
chr1_52348603_52349104	chr1	52348603	52349104	17352	CC2D1B	CC2D1B	.	TRUE	.	.	.
chr1_54541941_54542854	chr1	54541941	54542854	-5737	ACOT11	ACOT11	.	TRUE	.	TRUE	TRUE
chr1_58584495_58584996	chr1	58584495	58584996	-7251	TACSTD2	TACSTD2	.	TRUE	.	.	TRUE
chr1_66995975_66996484	chr1	66995975	66996484	58168	SLC35D1	SLC35D1	.	TRUE	.	.	.
chr1_78176385_78176886	chr1	78176385	78176886	-52964	MGC27382	MGC27382	.	TRUE	.	.	TRUE
chr1_89104553_89105054	chr1	89104553	89105054	21356	GBP2	GBP2	.	TRUE	.	TRUE	.
chr1_94621318_94621819	chr1	94621318	94621819	-79711	F3	F3	.	TRUE	.	TRUE	TRUE
chr1_94622732_94623233	chr1	94622732	94623233	-81125	F3	F3	.	TRUE	.	TRUE	.
chr1_109617381_109617882	chr1	109617381	109617882	-2182	AMPD2	AMPD2	.	TRUE	.	TRUE	TRUE
chr1_111110157_111110677	chr1	111110157	111110677	-28966	CEPT1	CEPT1	.	TRUE	.	.	.
chr1_116485046_116485688	chr1	116485046	116485688	-6541	LINC01762	LINC01762	.	TRUE	.	TRUE	TRUE
chr1_145424552_145425053	chr1	145424552	145425053	-19024	NBPF20	NBPF20	.	TRUE	.	TRUE	TRUE
chr1_148522372_148522984	chr1	148522372	148522984	-39393	PPIAL4G	PPIAL4G	.	TRUE	.	.	.
chr1_149102530_149103031	chr1	149102530	149103031	-20469	NBPF9	NBPF9	.	TRUE	.	TRUE	TRUE
chr1_149176383_149176884	chr1	149176383	149176884	-94322	NBPF9	NBPF9	.	TRUE	.	TRUE	.
chr1_149390182_149390859	chr1	149390182	149390859	-85378	NBPF19	NBPF19	.	TRUE	.	TRUE	.
chr1_150611426_150611941	chr1	150611426	150611941	17450	ENSA	ENSA	.	TRUE	.	.	TRUE
chr1_150619802_150620303	chr1	150619802	150620303	9081	ENSA	ENSA	.	TRUE	.	.	.
chr1_152047922_152048870	chr1	152047922	152048870	-11361	S100A11	S100A11	.	TRUE	.	TRUE	TRUE
chr1_160989909_160990410	chr1	160989909	160990410	31184	F11R	F11R	.	TRUE	.	TRUE	.
chr1_161389874_161390427	chr1	161389874	161390427	-22267	CFAP126	CFAP126	.	TRUE	.	TRUE	TRUE
chr1_161399120_161399987	chr1	161399120	161399987	-31670	CFAP126	CFAP126	.	TRUE	.	.	.
chr1_174008935_174009436	chr1	174008935	174009436	-16113	RC3H1	RC3H1	.	TRUE	.	.	.
chr1_177926980_177927481	chr1	177926980	177927481	42692	SEC16B	SEC16B	.	TRUE	.	.	TRUE
chr1_180962138_180962639	chr1	180962138	180962639	-7501	KIAA1614-AS1	KIAA1614-AS1	.	TRUE	.	.	.
chr1_201517591_201518092	chr1	201517591	201518092	-2063	RPS10P7	RPS10P7	.	TRUE	.	TRUE	.
chr1_204377628_204378392	chr1	204377628	204378392	-8291	LINC00628	LINC00628	.	TRUE	.	TRUE	.
chr1_204398365_204398866	chr1	204398365	204398866	13202	PPP1R15B	PPP1R15B	.	TRUE	.	.	.
chr1_204493856_204494949	chr1	204493856	204494949	-4056	PIK3C2B	PIK3C2B	.	TRUE	.	TRUE	.
chr1_207867371_207867938	chr1	207867371	207867938	43684	CD34	CD34	.	TRUE	.	TRUE	.
chr1_207884951_207885527	chr1	207884951	207885527	26099	CD34	CD34	.	TRUE	.	TRUE	.
chr1_212558482_212559291	chr1	212558482	212559291	-6448	ATF3	ATF3	.	TRUE	.	TRUE	TRUE
chr1_232620404_232620905	chr1	232620404	232620905	-97417	LINC01745	LINC01745	.	TRUE	.	.	.
chr1_233673893_233674394	chr1	233673893	233674394	49991	MIR4427	MIR4427	.	TRUE	.	.	TRUE
chr1_233707310_233707969	chr1	233707310	233707969	83487	MIR4427	MIR4427	.	TRUE	.	.	TRUE
chr1_244395944_244396445	chr1	244395944	244396445	43559	C1orf100	C1orf100	.	TRUE	.	TRUE	TRUE
chr1_247210236_247211171	chr1	247210236	247211171	-8643	MIR3916	MIR3916	.	TRUE	.	TRUE	.
chr10_3806517_3807044	chr10	3806517	3807044	-21499	KLF6	KLF6	.	TRUE	.	.	TRUE
chr10_4947606_4948229	chr10	4947606	4948229	-15345	AKR1C1	AKR1C1	.	TRUE	.	.	TRUE
chr10_5545851_5546386	chr10	5545851	5546386	-19872	CALML3-AS1	CALML3-AS1	.	TRUE	.	TRUE	TRUE
chr10_5546766_5547289	chr10	5546766	5547289	-20781	CALML3-AS1	CALML3-AS1	.	TRUE	.	TRUE	TRUE
chr10_5949316_5949817	chr10	5949316	5949817	19362	IL15RA	IL15RA	.	TRUE	.	.	.
chr10_5950363_5950864	chr10	5950363	5950864	18315	IL15RA	IL15RA	.	TRUE	.	.	.
chr10_5951054_5951555	chr10	5951054	5951555	17624	IL15RA	IL15RA	.	TRUE	.	TRUE	.
chr10_6275165_6275676	chr10	6275165	6275676	-51124	LOC399715	LINC02649	.	TRUE	.	TRUE	TRUE
chr10_31940760_31941270	chr10	31940760	31941270	-12139	ARHGAP12	ARHGAP12	.	TRUE	.	.	TRUE
chr10_32004072_32004573	chr10	32004072	32004573	52121	KIF5B	KIF5B	.	TRUE	.	.	TRUE
chr10_58291473_58291974	chr10	58291473	58291974	22621	CISD1	CISD1	.	TRUE	.	.	.
chr10_63158086_63158587	chr10	63158086	63158587	25089	NRBF2	NRBF2	.	TRUE	.	.	.
chr10_67849229_67850079	chr10	67849229	67850079	-11475	DNAJC12	DNAJC12	.	TRUE	.	.	.
chr10_69516865_69517366	chr10	69516865	69517366	56339	NEUROG3	NEUROG3	.	TRUE	.	TRUE	.
chr10_87216068_87216569	chr10	87216068	87216569	-9130	NUTM2A	NUTM2A	.	TRUE	.	TRUE	.
chr10_93916612_93917113	chr10	93916612	93917113	22892	SLC35G1	SLC35G1	.	TRUE	.	.	.
chr10_95183445_95184039	chr10	95183445	95184039	-10458	ACSM6	ACSM6	.	TRUE	.	.	.
chr10_95235909_95236410	chr10	95235909	95236410	41959	ACSM6	ACSM6	.	TRUE	.	.	TRUE
chr10_104300711_104301212	chr10	104300711	104301212	-22403	LOC101927472	ITPRIP-AS1	.	TRUE	.	.	TRUE
chr10_118304487_118305011	chr10	118304487	118305011	37578	FAM204A	FAM204A	.	TRUE	.	TRUE	TRUE
chr10_124916570_124917186	chr10	124916570	124917186	-25245	ZRANB1	ZRANB1	.	TRUE	.	.	.
chr10_124917611_124918112	chr10	124917611	124918112	-24262	ZRANB1	ZRANB1	.	TRUE	.	.	.
chr10_131997654_131998155	chr10	131997654	131998155	-15891	BNIP3	BNIP3	.	TRUE	.	.	.
chr11_1494575_1495076	chr11	1494575	1495076	-8046	MOB2	MOB2	.	TRUE	.	.	.
chr11_12279030_12279531	chr11	12279030	12279531	-7620	MICALCL	MICALCL	.	TRUE	.	.	TRUE
chr11_16761343_16761844	chr11	16761343	16761844	22992	C11orf58	C11orf58	.	TRUE	.	TRUE	.
chr11_34874164_34874665	chr11	34874164	34874665	-41716	PDHX	PDHX	.	TRUE	.	.	TRUE
chr11_34997993_34998494	chr11	34997993	34998494	56406	MIR1343	MIR1343	.	TRUE	.	.	.
chr11_43643938_43644703	chr11	43643938	43644703	-36273	HSD17B12	HSD17B12	.	TRUE	.	.	.
chr11_65305562_65306063	chr11	65305562	65306063	-9006	CDC42EP2	CDC42EP2	.	TRUE	.	.	TRUE
chr11_65418667_65419223	chr11	65418667	65419223	-3853	NEAT1	NEAT1	.	TRUE	.	TRUE	.
chr11_65476540_65477041	chr11	65476540	65477041	-20948	MALAT1	MALAT1	.	TRUE	.	.	.
chr11_69985640_69986141	chr11	69985640	69986141	78034	LOC101928443	LINC02753	.	TRUE	.	TRUE	.
chr11_71240940_71241441	chr11	71240940	71241441	-16394	SHANK2	SHANK2	.	TRUE	.	.	.
chr11_71283824_71284613	chr11	71283824	71284613	-59422	SHANK2	SHANK2	.	TRUE	.	.	.
chr11_71287270_71287771	chr11	71287270	71287771	-62724	SHANK2	SHANK2	.	TRUE	.	.	.
chr11_71745726_71746227	chr11	71745726	71746227	-41535	FAM86C1	FAM86C1	.	TRUE	.	.	.
chr11_72683690_72684191	chr11	72683690	72684191	-9487	PDE2A	PDE2A	.	TRUE	.	.	.
chr11_118929407_118929908	chr11	118929407	118929908	-18753	BCL9L	BCL9L	.	TRUE	.	.	.
chr11_128956377_128956878	chr11	128956377	128956878	-13228	TP53AIP1	TP53AIP1	.	TRUE	.	.	.
chr12_6296107_6296651	chr12	6296107	6296651	-14057	PLEKHG6	PLEKHG6	.	TRUE	.	.	TRUE
chr12_6392406_6392907	chr12	6392406	6392907	8623	LTBR	LTBR	.	TRUE	.	TRUE	.
chr12_14751937_14752438	chr12	14751937	14752438	18944	HIST4H4	HIST4H4	.	TRUE	.	TRUE	.
chr12_25386017_25386518	chr12	25386017	25386518	-135336	KRAS	KRAS	.	TRUE	.	TRUE	TRUE
chr12_28574777_28575278	chr12	28574777	28575278	-384289	LOC729291	LOC729291	.	TRUE	.	.	TRUE
chr12_32437101_32437602	chr12	32437101	32437602	-48621	FGD4	FGD4	.	TRUE	.	.	.
chr12_50297964_50298465	chr12	50297964	50298465	-14644	LIMA1	LIMA1	.	TRUE	.	.	.
chr12_50312187_50312688	chr12	50312187	50312688	-28867	LIMA1	LIMA1	.	TRUE	.	.	TRUE
chr12_51814371_51814872	chr12	51814371	51814872	17296	FIGNL2	FIGNL2	.	TRUE	.	.	.
chr12_52004001_52004502	chr12	52004001	52004502	-2694	GRASP	GRASP	.	TRUE	.	.	.
chr12_79563318_79563819	chr12	79563318	79563819	127012	PAWR	PAWR	.	TRUE	.	.	TRUE
chr12_80149503_80150004	chr12	80149503	80150004	-59700	OTOGL	OTOGL	.	TRUE	.	TRUE	.
chr12_89695057_89695558	chr12	89695057	89695558	-13648	ATP2B1-AS1	ATP2B1-AS1	.	TRUE	.	.	TRUE
chr12_89700124_89700625	chr12	89700124	89700625	-8581	ATP2B1-AS1	ATP2B1-AS1	.	TRUE	.	.	TRUE
chr12_93404181_93404682	chr12	93404181	93404682	25881	NUDT4	NUDT4	.	TRUE	.	.	.
chr12_93511900_93512401	chr12	93511900	93512401	44660	MRPL42	MRPL42	.	TRUE	.	TRUE	.
chr12_108643813_108644314	chr12	108643813	108644314	8253	MIR4496	MIR4496	.	TRUE	.	.	TRUE
chr12_109111796_109112297	chr12	109111796	109112297	13928	UNG	UNG	.	TRUE	.	.	.
chr12_118126276_118126777	chr12	118126276	118126777	-9358	PEBP1	PEBP1	.	TRUE	.	.	.
chr12_121425225_121425726	chr12	121425225	121425726	18877	MIR7107	MIR7107	.	TRUE	.	TRUE	TRUE
chr12_123412625_123413126	chr12	123412625	123413126	21600	KMT5A	KMT5A	.	TRUE	.	.	TRUE
chr13_41054335_41054836	chr13	41054335	41054836	-6672	WBP4	WBP4	.	TRUE	.	.	.
chr13_49976412_49977047	chr13	49976412	49977047	19772	MIR3613	MIR3613	.	TRUE	.	TRUE	TRUE
chr13_50617251_50617752	chr13	50617251	50617752	-90052	DLEU1-AS1	DLEU1-AS1	.	TRUE	.	.	TRUE
chr13_51764317_51765069	chr13	51764317	51765069	39469	DHRS12	DHRS12	.	TRUE	.	TRUE	TRUE
chr13_110517698_110518199	chr13	110517698	110518199	-9769	COL4A2-AS1	COL4A2-AS1	.	TRUE	.	TRUE	TRUE
chr13_110726689_110727190	chr13	110726689	110727190	11502	ING1	ING1	.	TRUE	.	TRUE	TRUE
chr14_21455808_21456467	chr14	21455808	21456467	-18839	CHD8	CHD8	.	TRUE	.	TRUE	.
chr14_49972664_49973165	chr14	49972664	49973165	6515	MIR6076	MIR6076	.	TRUE	.	.	TRUE
chr14_55077477_55078383	chr14	55077477	55078383	26286	MAPK1IP1L	MAPK1IP1L	.	TRUE	.	TRUE	.
chr14_55354547_55355048	chr14	55354547	55355048	57061	ATG14	ATG14	.	TRUE	.	.	.
chr14_66405073_66405574	chr14	66405073	66405574	-81048	CCDC196	CCDC196	.	TRUE	.	.	TRUE
chr14_70496789_70497290	chr14	70496789	70497290	-13283	ADAM20P1	ADAM20P1	.	TRUE	.	TRUE	TRUE
chr14_81170131_81170835	chr14	81170131	81170835	32351	SNORA79	SNORA79	.	TRUE	.	TRUE	TRUE
chr14_90383806_90384307	chr14	90383806	90384307	-12927	CALM1	CALM1	.	TRUE	.	TRUE	.
chr14_90850571_90851072	chr14	90850571	90851072	-34404	TTC7B	TTC7B	.	TRUE	.	.	.
chr14_91228403_91228904	chr14	91228403	91228904	15855	GPR68	GPR68	.	TRUE	.	.	.
chr14_91229625_91230126	chr14	91229625	91230126	14633	GPR68	GPR68	.	TRUE	.	.	.
chr14_102524523_102525196	chr14	102524523	102525196	-14785	MIR4309	MIR4309	.	TRUE	.	TRUE	.
chr14_106845378_106845879	chr14	106845378	106845879	5371	MIR5195	MIR5195	.	TRUE	.	.	.
chr15_35288957_35289458	chr15	35288957	35289458	51881	ANP32AP1	ANP32AP1	.	TRUE	.	.	.
chr15_40859079_40859580	chr15	40859079	40859580	-14805	SPINT1-AS1	SPINT1-AS1	.	TRUE	.	.	TRUE
chr15_45449842_45450380	chr15	45449842	45450380	17061	MIR147B	MIR147B	.	TRUE	.	TRUE	TRUE
chr15_59595398_59595900	chr15	59595398	59595900	-16134	GCNT3	GCNT3	.	TRUE	.	.	.
chr15_62390811_62391312	chr15	62390811	62391312	48032	MIR6085	MIR6085	.	TRUE	.	.	.
chr15_62578502_62579003	chr15	62578502	62579003	66429	MGC15885	MGC15885	.	TRUE	.	.	.
chr15_62603696_62604197	chr15	62603696	62604197	41235	MGC15885	MGC15885	.	TRUE	.	TRUE	.
chr15_62606349_62606850	chr15	62606349	62606850	38582	MGC15885	MGC15885	.	TRUE	.	.	TRUE
chr15_64460272_64460803	chr15	64460272	64460803	-38883	ZNF609	ZNF609	.	TRUE	.	TRUE	.
chr15_72341355_72341856	chr15	72341355	72341856	-21421	CELF6	CELF6	.	TRUE	.	TRUE	.
chr15_75054191_75054692	chr15	75054191	75054692	11172	PPCDC	PPCDC	.	TRUE	.	TRUE	.
chr15_78909744_78910245	chr15	78909744	78910245	35104	CTSH	CTSH	.	TRUE	.	.	.
chr15_90852806_90853307	chr15	90852806	90853307	-15536	FURIN	FURIN	.	TRUE	.	TRUE	TRUE
chr15_92801333_92801834	chr15	92801333	92801834	6099	ASB9P1	ASB9P1	.	TRUE	.	TRUE	.
chr15_92803827_92804347	chr15	92803827	92804347	8603	ASB9P1	ASB9P1	.	TRUE	.	TRUE	TRUE
chr15_94230989_94231744	chr15	94230989	94231744	-66835	MCTP2	MCTP2	.	TRUE	.	TRUE	.
chr15_94236602_94237103	chr15	94236602	94237103	-61349	MCTP2	MCTP2	.	TRUE	.	.	TRUE
chr15_94237848_94238349	chr15	94237848	94238349	-60103	MCTP2	MCTP2	.	TRUE	.	.	TRUE
chr15_94239457_94239958	chr15	94239457	94239958	-58494	MCTP2	MCTP2	.	TRUE	.	TRUE	.
chr15_94248026_94248738	chr15	94248026	94248738	-49819	MCTP2	MCTP2	.	TRUE	.	.	.
chr15_94293367_94293868	chr15	94293367	94293868	-4584	MCTP2	MCTP2	.	TRUE	.	.	.
chr16_1935268_1935769	chr16	1935268	1935769	7808	MSRB1	MSRB1	.	TRUE	.	TRUE	TRUE
chr16_3618732_3619233	chr16	3618732	3619233	-7376	SLX4	SLX4	.	TRUE	.	.	TRUE
chr16_10509491_10509995	chr16	10509491	10509995	18455	LINC01290	LINC01290	.	TRUE	.	TRUE	.
chr16_23516694_23517195	chr16	23516694	23517195	-6450	GGA2	GGA2	.	TRUE	.	.	.
chr16_25270511_25271012	chr16	25270511	25271012	-13227	ZKSCAN2	ZKSCAN2	.	TRUE	.	.	.
chr16_30549320_30549821	chr16	30549320	30549821	8751	ZNF764	ZNF764	.	TRUE	.	.	TRUE
chr16_68529819_68530357	chr16	68529819	68530357	-9125	ZFP90	ZFP90	.	TRUE	.	TRUE	.
chr16_69732054_69732555	chr16	69732054	69732555	-5636	NQO1	NQO1	.	TRUE	.	TRUE	.
chr16_75594095_75594596	chr16	75594095	75594596	27994	GABARAPL2	GABARAPL2	.	TRUE	.	TRUE	TRUE
chr16_85567128_85567629	chr16	85567128	85567629	-44045	GSE1	GSE1	.	TRUE	.	TRUE	.
chr16_85607262_85607763	chr16	85607262	85607763	-3911	GSE1	GSE1	.	TRUE	.	TRUE	.
chr17_794814_795315	chr17	794814	795315	-12733	GLOD4	GLOD4	.	TRUE	.	TRUE	.
chr17_14211830_14212331	chr17	14211830	14212331	24782	CDRT15	CDRT15	.	TRUE	.	TRUE	.
chr17_19897890_19898391	chr17	19897890	19898391	-30214	ULK2	ULK2	.	TRUE	.	TRUE	TRUE
chr17_27315526_27316027	chr17	27315526	27316027	21755	WSB1	WSB1	.	TRUE	.	.	.
chr17_27456136_27456683	chr17	27456136	27456683	-15601	KSR1	KSR1	.	TRUE	.	.	.
chr17_32943784_32944285	chr17	32943784	32944285	16124	TMEM98	TMEM98	.	TRUE	.	.	.
chr17_39153710_39154643	chr17	39153710	39154643	-2527	PLXDC1	PLXDC1	.	TRUE	.	TRUE	.
chr17_41654038_41654545	chr17	41654038	41654545	-14092	KRT42P	KRT42P	.	TRUE	.	TRUE	TRUE
chr17_42548096_42548597	chr17	42548096	42548597	-4212	HSD17B1	HSD17B1	.	TRUE	.	TRUE	.
chr17_48630983_48631484	chr17	48630983	48631484	1326	MIR196A1	MIR196A1	.	TRUE	.	TRUE	.
chr17_48671571_48672079	chr17	48671571	48672079	-39266	MIR196A1	MIR196A1	.	TRUE	.	TRUE	.
chr17_49836072_49836573	chr17	49836072	49836573	-9588	FLJ45513	FLJ45513	.	TRUE	.	.	.
chr17_50361976_50362477	chr17	50361976	50362477	10975	MRPL27	MRPL27	.	TRUE	.	.	.
chr17_59843518_59844032	chr17	59843518	59844032	2509	MIR21	MIR21	.	TRUE	.	.	.
chr17_59845508_59846077	chr17	59845508	59846077	4526	MIR21	MIR21	.	TRUE	.	TRUE	TRUE
chr17_59846170_59846671	chr17	59846170	59846671	5154	MIR21	MIR21	.	TRUE	.	.	TRUE
chr17_62472958_62473459	chr17	62472958	62473459	-5560	TLK2	TLK2	.	TRUE	.	.	TRUE
chr17_62974703_62975204	chr17	62974703	62975204	30738	MIR633	MIR633	.	TRUE	.	.	.
chr17_64961742_64962243	chr17	64961742	64962243	13593	AMZ2P1	AMZ2P1	.	TRUE	.	.	.
chr17_72370872_72371373	chr17	72370872	72371373	28311	LINC02003	LINC02003	.	TRUE	.	TRUE	TRUE
chr17_76789400_76789901	chr17	76789400	76789901	-9394	LINC02080	LINC02080	.	TRUE	.	.	.
chr17_78986697_78987198	chr17	78986697	78987198	-6968	LGALS3BP	LGALS3BP	.	TRUE	.	TRUE	TRUE
chr17_78987642_78988143	chr17	78987642	78988143	-7913	LGALS3BP	LGALS3BP	.	TRUE	.	TRUE	.
chr17_81734253_81734754	chr17	81734253	81734754	22267	SLC25A10	SLC25A10	.	TRUE	.	.	TRUE
chr17_82655219_82655720	chr17	82655219	82655720	-6934	WDR45B	WDR45B	.	TRUE	.	.	TRUE
chr18_22920522_22921023	chr18	22920522	22921023	-12560	RBBP8	RBBP8	.	TRUE	.	.	TRUE
chr18_23281968_23282469	chr18	23281968	23282469	126393	CABLES1	CABLES1	.	TRUE	.	.	TRUE
chr18_35635165_35635666	chr18	35635165	35635666	-19154	GALNT1	GALNT1	.	TRUE	.	.	TRUE
chr19_11657187_11657688	chr19	11657187	11657688	9652	HNRNPA1P10	HNRNPA1P10	.	TRUE	.	.	.
chr19_13841378_13841879	chr19	13841378	13841879	-4969	MIR23A	MIR23A	.	TRUE	.	TRUE	.
chr19_39430584_39431175	chr19	39430584	39431175	5141	RPS16	RPS16	.	TRUE	.	.	TRUE
chr19_41166913_41168089	chr19	41166913	41168089	-25706	CYP2S1	CYP2S1	.	TRUE	.	TRUE	.
chr19_44723796_44724309	chr19	44723796	44724309	-24669	BCL3	BCL3	.	TRUE	.	.	.
chr19_48878524_48879025	chr19	48878524	48879025	6382	PPP1R15A	PPP1R15A	.	TRUE	.	TRUE	.
chr19_49331512_49332013	chr19	49331512	49332013	-3658	CD37	CD37	.	TRUE	.	.	.
chr19_52600980_52601536	chr19	52600980	52601536	4574	ZNF137P	ZNF137P	.	TRUE	.	TRUE	TRUE
chr19_52922848_52923754	chr19	52922848	52923754	-5370	ZNF888	ZNF888	.	TRUE	.	TRUE	.
chr19_55703650_55704151	chr19	55703650	55704151	27275	EPN1	EPN1	.	TRUE	.	.	.
chr19_57799090_57799594	chr19	57799090	57799594	15571	ZNF552	ZNF552	.	TRUE	.	.	.
chr19_57903985_57904486	chr19	57903985	57904486	12375	ZNF417	ZNF417	.	TRUE	.	TRUE	.
chr2_3154668_3155169	chr2	3154668	3155169	-28892	LINC01250	LINC01250	.	TRUE	.	TRUE	TRUE
chr2_8447553_8448054	chr2	8447553	8448054	-119384	LINC00299	LINC00299	.	TRUE	.	.	TRUE
chr2_8488129_8488630	chr2	8488129	8488630	95413	LINC01814	LINC01814	.	TRUE	.	.	.
chr2_19048795_19049304	chr2	19048795	19049304	-22078	LINC01376	LINC01376	.	TRUE	.	.	.
chr2_19305527_19306028	chr2	19305527	19306028	-42652	MIR4757	MIR4757	.	TRUE	.	TRUE	.
chr2_20611137_20611731	chr2	20611137	20611731	-18886	HS1BP3-IT1	HS1BP3-IT1	.	TRUE	.	.	.
chr2_24527505_24528006	chr2	24527505	24528006	-56722	NCOA1	NCOA1	.	TRUE	.	.	TRUE
chr2_24572010_24572511	chr2	24572010	24572511	-12217	NCOA1	NCOA1	.	TRUE	.	.	TRUE
chr2_28423813_28424314	chr2	28423813	28424314	-29391	FLJ31356	FLJ31356	.	TRUE	.	.	.
chr2_37324547_37325350	chr2	37324547	37325350	-7869	PRKD3	PRKD3	.	TRUE	.	TRUE	.
chr2_38555147_38555648	chr2	38555147	38555648	-39657	LOC101929596	LOC101929596	.	TRUE	.	.	.
chr2_61763952_61764640	chr2	61763952	61764640	89847	FAM161A	FAM161A	.	TRUE	.	TRUE	.
chr2_64400758_64401259	chr2	64400758	64401259	-53185	LGALSL	LGALSL	.	TRUE	.	.	TRUE
chr2_65031519_65032020	chr2	65031519	65032020	-24592	CEP68	CEP68	.	TRUE	.	.	.
chr2_65300913_65301414	chr2	65300913	65301414	65634	SPRED2	SPRED2	.	TRUE	.	.	TRUE
chr2_65309533_65310034	chr2	65309533	65310034	57014	SPRED2	SPRED2	.	TRUE	.	.	.
chr2_73283392_73283893	chr2	73283392	73283893	10059	EGR4	EGR4	.	TRUE	.	TRUE	.
chr2_73753799_73754300	chr2	73753799	73754300	-16643	TPRKB	TPRKB	.	TRUE	.	.	.
chr2_95207119_95207878	chr2	95207119	95207878	42081	ZNF2	ZNF2	.	TRUE	.	TRUE	.
chr2_95292795_95293296	chr2	95292795	95293296	-4279	KCNIP3	KCNIP3	.	TRUE	.	.	TRUE
chr2_97267479_97267980	chr2	97267479	97267980	-10988	LOC100506076	LOC100506076	.	TRUE	.	TRUE	.
chr2_108270736_108271409	chr2	108270736	108271409	-17567	SULT1C2	SULT1C2	.	TRUE	.	.	TRUE
chr2_113165099_113165600	chr2	113165099	113165600	-8634	PSD4	PSD4	.	TRUE	.	.	TRUE
chr2_113965586_113966102	chr2	113965586	113966102	-3478	LINC01191	LINC01191	.	TRUE	.	.	.
chr2_113966761_113967262	chr2	113966761	113967262	-2311	LINC01191	LINC01191	.	TRUE	.	.	.
chr2_117556684_117557185	chr2	117556684	117557185	-257745	DDX18	DDX18	.	TRUE	.	.	.
chr2_120204490_120204991	chr2	120204490	120204991	18668	TMEM185B	TMEM185B	.	TRUE	.	TRUE	.
chr2_127479182_127479683	chr2	127479182	127479683	47079	IWS1	IWS1	.	TRUE	.	.	.
chr2_134136871_134137372	chr2	134136871	134137372	9996	MIR3679	MIR3679	.	TRUE	.	.	TRUE
chr2_134139580_134140081	chr2	134139580	134140081	12705	MIR3679	MIR3679	.	TRUE	.	TRUE	.
chr2_134140271_134140805	chr2	134140271	134140805	13413	MIR3679	MIR3679	.	TRUE	.	TRUE	TRUE
chr2_134142873_134143374	chr2	134142873	134143374	15998	MIR3679	MIR3679	.	TRUE	.	.	TRUE
chr2_134146475_134146976	chr2	134146475	134146976	19600	MIR3679	MIR3679	.	TRUE	.	.	.
chr2_134154143_134154644	chr2	134154143	134154644	27268	MIR3679	MIR3679	.	TRUE	.	TRUE	.
chr2_134173485_134173986	chr2	134173485	134173986	46610	MIR3679	MIR3679	.	TRUE	.	.	.
chr2_134181119_134181620	chr2	134181119	134181620	54244	MIR3679	MIR3679	.	TRUE	.	TRUE	.
chr2_138395633_138396134	chr2	138395633	138396134	-105897	SPOPL	SPOPL	.	TRUE	.	.	TRUE
chr2_138421673_138422174	chr2	138421673	138422174	-79857	SPOPL	SPOPL	.	TRUE	.	.	.
chr2_157699276_157699777	chr2	157699276	157699777	-70639	ACVR1C	ACVR1C	.	TRUE	.	TRUE	.
chr2_178506484_178507015	chr2	178506484	178507015	-16078	TTN-AS1	TTN-AS1	.	TRUE	.	TRUE	.
chr2_181066200_181066701	chr2	181066200	181066701	-57387	LINC01934	LINC01934	.	TRUE	.	.	.
chr2_190627706_190628207	chr2	190627706	190628207	-20939	NAB1	NAB1	.	TRUE	.	TRUE	.
chr2_216033927_216034428	chr2	216033927	216034428	-20554	MREG	MREG	.	TRUE	.	.	.
chr2_222566342_222566843	chr2	222566342	222566843	89763	FARSB	FARSB	.	TRUE	.	.	.
chr2_238290908_238291409	chr2	238290908	238291409	-2592	PER2	PER2	.	TRUE	.	TRUE	.
chr20_472441_472942	chr20	472441	472942	-10138	TBC1D20	TBC1D20	.	TRUE	.	.	.
chr20_13380635_13381136	chr20	13380635	13381136	-141198	ISM1-AS1	ISM1-AS1	.	TRUE	.	TRUE	.
chr20_17612118_17612619	chr20	17612118	17612619	42414	DSTN	DSTN	.	TRUE	.	TRUE	.
chr20_18019061_18019562	chr20	18019061	18019562	38571	OVOL2	OVOL2	.	TRUE	.	.	.
chr20_19757878_19758584	chr20	19757878	19758584	-128290	RIN2	RIN2	.	TRUE	.	TRUE	.
chr20_24930386_24930887	chr20	24930386	24930887	-18594	CST7	CST7	.	TRUE	.	.	TRUE
chr20_32342304_32342805	chr20	32342304	32342805	-15790	ASXL1	ASXL1	.	TRUE	.	.	TRUE
chr20_33650963_33651464	chr20	33650963	33651464	-11073	C20orf144	C20orf144	.	TRUE	.	.	.
chr20_43549549_43550050	chr20	43549549	43550050	-9196	SGK2	SGK2	.	TRUE	.	.	.
chr20_46348107_46348608	chr20	46348107	46348608	16101	SLC35C2	SLC35C2	.	TRUE	.	.	.
chr20_49104213_49104714	chr20	49104213	49104714	58217	CSE1L	CSE1L	.	TRUE	.	.	.
chr20_51594942_51595445	chr20	51594942	51595445	-32362	NFATC2	NFATC2	.	TRUE	.	.	.
chr20_62595493_62595994	chr20	62595493	62595994	30831	MIR133A2	MIR133A2	.	TRUE	.	TRUE	TRUE
chr20_62596375_62596876	chr20	62596375	62596876	31713	MIR133A2	MIR133A2	.	TRUE	.	TRUE	.
chr21_33361134_33361749	chr21	33361134	33361749	36532	IFNAR1	IFNAR1	.	TRUE	.	.	.
chr21_37563726_37564723	chr21	37563726	37564723	143925	DYRK1A	DYRK1A	.	TRUE	.	TRUE	TRUE
chr21_41165145_41165656	chr21	41165145	41165656	-2157	MIR3197	MIR3197	.	TRUE	.	.	TRUE
chr21_46448761_46449262	chr21	46448761	46449262	-9938	DIP2A	DIP2A	.	TRUE	.	TRUE	.
chr22_21657322_21658148	chr22	21657322	21658148	4431	MIR130B	MIR130B	.	TRUE	.	TRUE	.
chr22_24576741_24577242	chr22	24576741	24577242	-6759	GGT1	GGT1	.	TRUE	.	.	.
chr22_26798602_26799103	chr22	26798602	26799103	-61359	LOC110091768	LOC110091768	.	TRUE	.	TRUE	.
chr22_30250672_30251173	chr22	30250672	30251173	-4071	LIF	LIF	.	TRUE	.	TRUE	.
chr22_30252449_30252950	chr22	30252449	30252950	-5848	LIF	LIF	.	TRUE	.	TRUE	.
chr22_37198845_37200008	chr22	37198845	37200008	-11136	C1QTNF6	C1QTNF6	.	TRUE	.	TRUE	.
chr22_38758453_38758954	chr22	38758453	38758954	-2684	SUN2	SUN2	.	TRUE	.	TRUE	.
chr22_41936159_41936660	chr22	41936159	41936660	3810	CENPM	CENPM	.	TRUE	.	TRUE	.
chr22_42293061_42293562	chr22	42293061	42293562	-9384	TCF20	TCF20	.	TRUE	.	.	.
chr22_42316919_42317420	chr22	42316919	42317420	-33242	TCF20	TCF20	.	TRUE	.	TRUE	TRUE
chr22_42862037_42862538	chr22	42862037	42862538	-4885	ARFGAP3	ARFGAP3	.	TRUE	.	.	TRUE
chr22_42867687_42868191	chr22	42867687	42868191	-10537	ARFGAP3	ARFGAP3	.	TRUE	.	.	.
chr22_45626221_45626722	chr22	45626221	45626722	-20824	LINC01589	LINC01589	.	TRUE	.	TRUE	TRUE
chr22_46078598_46079099	chr22	46078598	46079099	-7149	MIRLET7BHG	MIRLET7BHG	.	TRUE	.	.	.
chr3_3861769_3862270	chr3	3861769	3862270	-61144	LOC100130207	LOC100130207	.	TRUE	.	.	.
chr3_15405368_15405869	chr3	15405368	15405869	21929	METTL6	METTL6	.	TRUE	.	.	.
chr3_32460075_32460576	chr3	32460075	32460576	42586	CMTM6	CMTM6	.	TRUE	.	.	.
chr3_32467742_32468267	chr3	32467742	32468267	34907	CMTM6	CMTM6	.	TRUE	.	TRUE	.
chr3_42012987_42013811	chr3	42012987	42013811	-50959	ULK4	ULK4	.	TRUE	.	TRUE	.
chr3_42020919_42021420	chr3	42020919	42021420	-58729	ULK4	ULK4	.	TRUE	.	.	TRUE
chr3_42072012_42072513	chr3	42072012	42072513	-14938	TRAK1	TRAK1	.	TRUE	.	.	TRUE
chr3_42780773_42781274	chr3	42780773	42781274	-7770	CCDC13	CCDC13	.	TRUE	.	.	TRUE
chr3_48400812_48401313	chr3	48400812	48401313	28401	PLXNB1	PLXNB1	.	TRUE	.	.	.
chr3_52299975_52300476	chr3	52299975	52300476	-5917	MIR135A1	MIR135A1	.	TRUE	.	TRUE	.
chr3_52313655_52314156	chr3	52313655	52314156	-2414	DNAH1	DNAH1	.	TRUE	.	TRUE	TRUE
chr3_53084341_53084842	chr3	53084341	53084842	-38518	SFMBT1	SFMBT1	.	TRUE	.	.	TRUE
chr3_123169418_123169919	chr3	123169418	123169919	7874	MIR7110	MIR7110	.	TRUE	.	.	TRUE
chr3_129378851_129379352	chr3	129378851	129379352	18247	SNORA7B	SNORA7B	.	TRUE	.	TRUE	.
chr3_138043612_138044113	chr3	138043612	138044113	33698	CLDN18	CLDN18	.	TRUE	.	TRUE	TRUE
chr3_138781017_138781518	chr3	138781017	138781518	-21908	PIK3CB	PIK3CB	.	TRUE	.	.	.
chr3_146511178_146511909	chr3	146511178	146511909	-15552	PLSCR2	PLSCR2	.	TRUE	.	.	.
chr3_150538712_150539252	chr3	150538712	150539252	7659	SERP1	SERP1	.	TRUE	.	.	.
chr3_157166577_157167090	chr3	157166577	157167090	-6073	CCNL1	CCNL1	.	TRUE	.	.	.
chr3_161254297_161254798	chr3	161254297	161254798	33257	NMD3	NMD3	.	TRUE	.	.	.
chr3_167673167_167673668	chr3	167673167	167673668	-15414	WDR49	WDR49	.	TRUE	.	.	.
chr3_174440718_174441674	chr3	174440718	174441674	-418125	NAALADL2	NAALADL2	.	TRUE	.	TRUE	TRUE
chr3_186596848_186597349	chr3	186596848	186597349	-15825	AHSG	AHSG	.	TRUE	.	TRUE	.
chr3_187890164_187890665	chr3	187890164	187890665	85993	LINC01991	LINC01991	.	TRUE	.	TRUE	.
chr3_194476700_194477201	chr3	194476700	194477201	-8711	ATP13A3	ATP13A3	.	TRUE	.	TRUE	.
chr4_9603999_9604502	chr4	9603999	9604502	-47934	MIR548I2	MIR548I2	.	TRUE	.	.	TRUE
chr4_10828789_10829290	chr4	10828789	10829290	-144174	CLNK	CLNK	.	TRUE	.	TRUE	TRUE
chr4_10954747_10955248	chr4	10954747	10955248	-270132	CLNK	CLNK	.	TRUE	.	.	TRUE
chr4_11074499_11075000	chr4	11074499	11075000	-294078	MIR572	MIR572	.	TRUE	.	.	.
chr4_37867074_37867575	chr4	37867074	37867575	-23760	TBC1D1	TBC1D1	.	TRUE	.	.	.
chr4_38157534_38158035	chr4	38157534	38158035	37830	TBC1D1	TBC1D1	.	TRUE	.	TRUE	.
chr4_38160831_38161380	chr4	38160831	38161380	41151	TBC1D1	TBC1D1	.	TRUE	.	.	TRUE
chr4_52722079_52722711	chr4	52722079	52722711	9146	SNORA26	SNORA26	.	TRUE	.	TRUE	.
chr4_54006630_54007131	chr4	54006630	54007131	-19598	RPL21P44	RPL21P44	.	TRUE	.	.	.
chr4_74398354_74398855	chr4	74398354	74398855	33461	EREG	EREG	.	TRUE	.	TRUE	.
chr4_83261278_83261779	chr4	83261278	83261779	23267	COQ2	COQ2	.	TRUE	.	TRUE	.
chr4_84661569_84662070	chr4	84661569	84662070	78915	CDS1	CDS1	.	TRUE	.	.	.
chr4_86922338_86922916	chr4	86922338	86922916	12223	AFF1-AS1	AFF1-AS1	.	TRUE	.	.	.
chr4_122152054_122153065	chr4	122152054	122153065	-18044	KIAA1109	KIAA1109	.	TRUE	.	TRUE	.
chr4_123546890_123547554	chr4	123546890	123547554	-102769	LINC01091	LINC01091	.	TRUE	.	TRUE	.
chr4_127844643_127845144	chr4	127844643	127845144	-35968	PLK4	PLK4	.	TRUE	.	TRUE	TRUE
chr4_151117280_151117781	chr4	151117280	151117781	13703	SNORD73A	SNORD73A	.	TRUE	.	.	TRUE
chr4_151313407_151313908	chr4	151313407	151313908	36484	PRSS48	PRSS48	.	TRUE	.	TRUE	TRUE
chr5_10223719_10224220	chr5	10223719	10224220	25940	FAM173B	ATPSCKMT	.	TRUE	.	TRUE	.
chr5_14011333_14011981	chr5	14011333	14011981	-67177	DNAH5	DNAH5	.	TRUE	.	TRUE	.
chr5_75363641_75364142	chr5	75363641	75364142	26723	HMGCR	HMGCR	.	TRUE	.	.	.
chr5_115209234_115209782	chr5	115209234	115209782	-28962	TRIM36	TRIM36	.	TRUE	.	.	.
chr5_116361468_116361969	chr5	116361468	116361969	12852	LOC101927190	LOC101927190	.	TRUE	.	.	.
chr5_128199098_128199599	chr5	128199098	128199599	115557	SLC12A2	SLC12A2	.	TRUE	.	.	TRUE
chr5_132496683_132497194	chr5	132496683	132497194	-6165	IRF1	IRF1	.	TRUE	.	TRUE	.
chr5_132501141_132501784	chr5	132501141	132501784	-10689	IRF1	IRF1	.	TRUE	.	TRUE	.
chr5_132502008_132502593	chr5	132502008	132502593	-11527	IRF1	IRF1	.	TRUE	.	.	TRUE
chr5_139633198_139633699	chr5	139633198	139633699	-13851	CXXC5	CXXC5	.	TRUE	.	.	.
chr5_139638257_139638764	chr5	139638257	139638764	-8789	CXXC5	CXXC5	.	TRUE	.	TRUE	.
chr5_139685835_139686336	chr5	139685835	139686336	10645	CXXC5	CXXC5	.	TRUE	.	.	.
chr5_149564652_149565166	chr5	149564652	149565166	-13357	CSNK1A1	CSNK1A1	.	TRUE	.	TRUE	.
chr5_151740586_151741087	chr5	151740586	151741087	17813	ATOX1	ATOX1	.	TRUE	.	.	.
chr5_154058198_154058773	chr5	154058198	154058773	19526	MFAP3	MFAP3	.	TRUE	.	.	TRUE
chr5_173035894_173036395	chr5	173035894	173036395	15418	SNORA74B	SNORA74B	.	TRUE	.	.	TRUE
chr6_1287162_1287663	chr6	1287162	1287663	-25028	FOXQ1	FOXQ1	.	TRUE	.	.	TRUE
chr6_3990840_3991345	chr6	3990840	3991345	-30243	PRPF4B	PRPF4B	.	TRUE	.	.	.
chr6_7050782_7051772	chr6	7050782	7051772	-56320	RREB1	RREB1	.	TRUE	.	TRUE	TRUE
chr6_7086301_7086802	chr6	7086301	7086802	-21046	RREB1	RREB1	.	TRUE	.	.	.
chr6_7098918_7099419	chr6	7098918	7099419	-8429	RREB1	RREB1	.	TRUE	.	TRUE	.
chr6_24720658_24721925	chr6	24720658	24721925	-2116	C6orf62	C6orf62	.	TRUE	.	TRUE	TRUE
chr6_26097224_26097725	chr6	26097224	26097725	-6440	LOC108783645	LOC108783645	.	TRUE	.	.	.
chr6_27134295_27134796	chr6	27134295	27134796	1507	HIST1H2AG	HIST1H2AG	.	TRUE	.	.	.
chr6_33570919_33571420	chr6	33570919	33571420	9124	BAK1	BAK1	.	TRUE	.	TRUE	.
chr6_42099477_42100053	chr6	42099477	42100053	43212	C6orf132	C6orf132	.	TRUE	.	TRUE	TRUE
chr6_52417543_52418044	chr6	52417543	52418044	-2403	EFHC1	EFHC1	.	TRUE	.	TRUE	TRUE
chr6_71375608_71376109	chr6	71375608	71376109	1173	MIR30C2	MIR30C2	.	TRUE	.	.	TRUE
chr6_71385058_71385559	chr6	71385058	71385559	-8277	MIR30C2	MIR30C2	.	TRUE	.	.	.
chr6_71388782_71389283	chr6	71388782	71389283	-12001	MIR30C2	MIR30C2	.	TRUE	.	.	TRUE
chr6_71395982_71396483	chr6	71395982	71396483	7389	MIR30A	MIR30A	.	TRUE	.	.	.
chr6_73523447_73523948	chr6	73523447	73523948	-2665	EEF1A1	EEF1A1	.	TRUE	.	TRUE	.
chr6_79544903_79545409	chr6	79544903	79545409	-7726	LCA5	LCA5	.	TRUE	.	.	TRUE
chr6_79604562_79605063	chr6	79604562	79605063	-26293	SH3BGRL2	SH3BGRL2	.	TRUE	.	.	.
chr6_82385715_82386216	chr6	82385715	82386216	21721	TPBG	TPBG	.	TRUE	.	.	.
chr6_83201969_83202470	chr6	83201969	83202470	-8283	PGM3	PGM3	.	TRUE	.	.	.
chr6_83962465_83962966	chr6	83962465	83962966	-70944	MRAP2	MRAP2	.	TRUE	.	.	.
chr6_87392981_87393482	chr6	87392981	87393482	-3893	LINC01590	LINC01590	.	TRUE	.	.	.
chr6_126107474_126107975	chr6	126107474	126107975	121294	TRMT11	TRMT11	.	TRUE	.	.	TRUE
chr6_126111982_126112492	chr6	126111982	126112492	125807	TRMT11	TRMT11	.	TRUE	.	.	TRUE
chr6_126170589_126171090	chr6	126170589	126171090	-168950	CENPW	CENPW	.	TRUE	.	TRUE	TRUE
chr6_129575323_129575824	chr6	129575323	129575824	134652	ARHGAP18	ARHGAP18	.	TRUE	.	.	TRUE
chr6_134954548_134955049	chr6	134954548	134955049	-4676	ALDH8A1	ALDH8A1	.	TRUE	.	.	.
chr6_138682586_138683087	chr6	138682586	138683087	-8832	FLJ46906	FLJ46906	.	TRUE	.	TRUE	TRUE
chr6_142947140_142947883	chr6	142947140	142947883	-2310	HIVEP2	HIVEP2	.	TRUE	.	TRUE	.
chr6_143543972_143544473	chr6	143543972	143544473	17829	PHACTR2-AS1	PHACTR2-AS1	.	TRUE	.	.	.
chr6_143546175_143546676	chr6	143546175	143546676	15626	PHACTR2-AS1	PHACTR2-AS1	.	TRUE	.	.	TRUE
chr6_147805094_147805595	chr6	147805094	147805595	296652	SAMD5	SAMD5	.	TRUE	.	.	.
chr6_154403703_154404204	chr6	154403703	154404204	-47187	IPCEF1	IPCEF1	.	TRUE	.	TRUE	.
chr6_154863670_154864171	chr6	154863670	154864171	10560	MIR1273C	MIR1273C	.	TRUE	.	.	.
chr6_154882100_154882601	chr6	154882100	154882601	28990	MIR1273C	MIR1273C	.	TRUE	.	.	TRUE
chr6_158232154_158232655	chr6	158232154	158232655	64057	GTF2H5	GTF2H5	.	TRUE	.	TRUE	.
chr6_158233394_158233895	chr6	158233394	158233895	65297	GTF2H5	GTF2H5	.	TRUE	.	TRUE	.
chr6_158271053_158271554	chr6	158271053	158271554	-41357	TULP4	TULP4	.	TRUE	.	.	.
chr6_158284243_158284744	chr6	158284243	158284744	-28167	TULP4	TULP4	.	TRUE	.	.	.
chr6_169428486_169428987	chr6	169428486	169428987	-174622	THBS2	THBS2	.	TRUE	.	TRUE	.
chr7_1466618_1467119	chr7	1466618	1467119	-7395	MICALL2	MICALL2	.	TRUE	.	TRUE	.
chr7_2440523_2441024	chr7	2440523	2441024	35610	GRIFIN	GRIFIN	.	TRUE	.	TRUE	.
chr7_6990263_6990875	chr7	6990263	6990875	76476	MIR3683	MIR3683	.	TRUE	.	TRUE	.
chr7_7051172_7051673	chr7	7051172	7051673	15623	MIR3683	MIR3683	.	TRUE	.	.	.
chr7_7054371_7054872	chr7	7054371	7054872	12424	MIR3683	MIR3683	.	TRUE	.	.	TRUE
chr7_7895681_7896182	chr7	7895681	7896182	-72812	GLCCI1	GLCCI1	.	TRUE	.	.	.
chr7_7921813_7922314	chr7	7921813	7922314	-46680	GLCCI1	GLCCI1	.	TRUE	.	.	.
chr7_26653657_26654158	chr7	26653657	26654158	14822	C7orf71	C7orf71	.	TRUE	.	.	.
chr7_26664948_26665449	chr7	26664948	26665449	26113	C7orf71	C7orf71	.	TRUE	.	.	.
chr7_29528482_29528983	chr7	29528482	29528983	-35079	PRR15	PRR15	.	TRUE	.	TRUE	.
chr7_30525396_30525897	chr7	30525396	30525897	-20805	GGCT	GGCT	.	TRUE	.	TRUE	TRUE
chr7_33717055_33717556	chr7	33717055	33717556	-187606	BMPER	BMPER	.	TRUE	.	.	.
chr7_33733795_33734570	chr7	33733795	33734570	-170729	BMPER	BMPER	.	TRUE	.	TRUE	.
chr7_66439791_66440292	chr7	66439791	66440292	-39633	LINC00174	LINC00174	.	TRUE	.	.	TRUE
chr7_77306130_77306631	chr7	77306130	77306631	-106547	FGL2	FGL2	.	TRUE	.	TRUE	TRUE
chr7_77653516_77654017	chr7	77653516	77654017	42499	APTR	APTR	.	TRUE	.	.	.
chr7_88274800_88275301	chr7	88274800	88275301	31863	STEAP4	STEAP4	.	TRUE	.	.	.
chr7_104945107_104945617	chr7	104945107	104945617	-18717	LHFPL3-AS2	LHFPL3-AS2	.	TRUE	.	.	.
chr7_105003285_105003786	chr7	105003285	105003786	10606	KMT2E-AS1	KMT2E-AS1	.	TRUE	.	.	TRUE
chr7_105897954_105898455	chr7	105897954	105898455	-21619	ATXN7L1	ATXN7L1	.	TRUE	.	TRUE	.
chr7_128103504_128104005	chr7	128103504	128104005	21893	MIR593	MIR593	.	TRUE	.	TRUE	.
chr7_128608867_128609368	chr7	128608867	128609368	-32124	LINC01000	LINC01000	.	TRUE	.	.	.
chr7_130922744_130923245	chr7	130922744	130923245	9530	LINC00513	LINC00513	.	TRUE	.	.	.
chr7_130930207_130930708	chr7	130930207	130930708	16993	LINC00513	LINC00513	.	TRUE	.	TRUE	.
chr7_135678728_135679229	chr7	135678728	135679229	16505	STMP1	STMP1	.	TRUE	.	.	TRUE
chr7_140229736_140230555	chr7	140229736	140230555	52884	KDM7A-DT	KDM7A-DT	.	TRUE	.	TRUE	.
chr7_149188806_149189307	chr7	149188806	149189307	-6406	ZNF282	ZNF282	.	TRUE	.	.	TRUE
chr7_156993616_156994117	chr7	156993616	156994117	-12441	MNX1-AS2	MNX1-AS2	.	TRUE	.	.	.
chr8_20223649_20224193	chr8	20223649	20224193	26728	ATP6V1B2	ATP6V1B2	.	TRUE	.	.	.
chr8_29061354_29061855	chr8	29061354	29061855	170288	HMBOX1	HMBOX1	.	TRUE	.	TRUE	.
chr8_37856361_37856862	chr8	37856361	37856862	-6698	BRF2	BRF2	.	TRUE	.	TRUE	.
chr8_42412515_42413275	chr8	42412515	42413275	21134	VDAC3	VDAC3	.	TRUE	.	.	TRUE
chr8_51904115_51904616	chr8	51904115	51904616	-5179	PCMTD1	PCMTD1	.	TRUE	.	TRUE	.
chr8_70834870_70835371	chr8	70834870	70835371	165673	XKR9	XKR9	.	TRUE	.	.	.
chr8_70946724_70947249	chr8	70946724	70947249	277539	XKR9	XKR9	.	TRUE	.	.	.
chr8_73049783_73050284	chr8	73049783	73050284	41171	TERF1	TERF1	.	TRUE	.	.	.
chr8_85239618_85240119	chr8	85239618	85240119	-5619	CA13	CA13	.	TRUE	.	.	.
chr8_85323669_85324170	chr8	85323669	85324170	17795	CA1	CA1	.	TRUE	.	TRUE	.
chr8_85402732_85403233	chr8	85402732	85403233	-24828	CA1	CA1	.	TRUE	.	TRUE	.
chr8_85431403_85431904	chr8	85431403	85431904	-7174	CA3	CA3	.	TRUE	.	TRUE	TRUE
chr8_93822267_93822771	chr8	93822267	93822771	67675	TMEM67	TMEM67	.	TRUE	.	.	.
chr8_101184331_101184832	chr8	101184331	101184832	21151	ZNF706	ZNF706	.	TRUE	.	.	.
chr8_117761023_117761524	chr8	117761023	117761524	159640	SNORD168	SNORD168	.	TRUE	.	.	.
chr8_126865978_126866479	chr8	126865978	126866479	-146926	PCAT1	PCAT1	.	TRUE	.	TRUE	.
chr8_127067786_127068287	chr8	127067786	127068287	-11838	PRNCR1	PRNCR1	.	TRUE	.	.	.
chr8_127126102_127126603	chr8	127126102	127126603	-44131	PCAT2	PCAT2	.	TRUE	.	.	.
chr8_134793770_134794271	chr8	134793770	134794271	6587	MIR30B	MIR30B	.	TRUE	.	.	.
chr8_134802829_134803330	chr8	134802829	134803330	1866	MIR30D	MIR30D	.	TRUE	.	.	.
chr8_134810337_134810838	chr8	134810337	134810838	-5642	MIR30D	MIR30D	.	TRUE	.	TRUE	.
chr8_140507011_140507512	chr8	140507011	140507512	-4037	CHRAC1	CHRAC1	.	TRUE	.	.	.
chr8_141277904_141278405	chr8	141277904	141278405	-23525	SLC45A4	SLC45A4	.	TRUE	.	TRUE	.
chr8_141279026_141279527	chr8	141279026	141279527	-24647	SLC45A4	SLC45A4	.	TRUE	.	.	.
chr8_141290098_141290599	chr8	141290098	141290599	-35719	SLC45A4	SLC45A4	.	TRUE	.	.	.
chr8_142738893_142739767	chr8	142738893	142739767	3081	SLURP1	SLURP1	.	TRUE	.	TRUE	.
chr9_37582511_37583012	chr9	37582511	37583012	-6508	FBXO10	FBXO10	.	TRUE	.	.	.
chr9_40883997_40884498	chr9	40883997	40884498	44845	MIR1299	MIR1299	.	TRUE	.	TRUE	.
chr9_75181675_75182258	chr9	75181675	75182258	93484	OSTF1	OSTF1	.	TRUE	.	TRUE	TRUE
chr9_91207807_91208308	chr9	91207807	91208308	88995	LINC00484	LINC00484	.	TRUE	.	.	TRUE
chr9_91211949_91212450	chr9	91211949	91212450	93137	LINC00484	LINC00484	.	TRUE	.	TRUE	.
chr9_92706384_92706885	chr9	92706384	92706885	-36369	IPPK	IPPK	.	TRUE	.	.	TRUE
chr9_94165837_94166341	chr9	94165837	94166341	-9868	MIRLET7A1	MIRLET7A1	.	TRUE	.	TRUE	TRUE
chr9_94166552_94167157	chr9	94166552	94167157	-9103	MIRLET7A1	MIRLET7A1	.	TRUE	.	TRUE	.
chr9_95090154_95090655	chr9	95090154	95090655	-4310	MIR3074	MIR3074	.	TRUE	.	TRUE	.
chr9_96874996_96876192	chr9	96874996	96876192	6694	LOC100132781	LOC100132781	.	TRUE	.	.	TRUE
chr9_96884342_96884887	chr9	96884342	96884887	15714	LOC100132781	LOC100132781	.	TRUE	.	TRUE	TRUE
chr9_99234698_99235199	chr9	99234698	99235199	12660	SEC61B	SEC61B	.	TRUE	.	.	.
chr9_101387736_101388237	chr9	101387736	101388237	-2981	BAAT	BAAT	.	TRUE	.	.	.
chr9_101388412_101388913	chr9	101388412	101388913	-3657	BAAT	BAAT	.	TRUE	.	.	.
chr9_107336927_107337428	chr9	107336927	107337428	52408	RAD23B	RAD23B	.	TRUE	.	.	TRUE
chr9_110213309_110213824	chr9	110213309	110213824	-5433	C9orf152	C9orf152	.	TRUE	.	TRUE	TRUE
chr9_120387576_120388077	chr9	120387576	120388077	-142776	MIR147A	MIR147A	.	TRUE	.	TRUE	TRUE
chr9_121819347_121819848	chr9	121819347	121819848	76812	DAB2IP	DAB2IP	.	TRUE	.	TRUE	.
chr9_129173935_129174436	chr9	129173935	129174436	4076	IER5L	IER5L	.	TRUE	.	TRUE	.
chr9_129413353_129414417	chr9	129413353	129414417	-74775	LINC00963	LINC00963	.	TRUE	.	TRUE	.
chr9_130707018_130707519	chr9	130707018	130707519	-6613	ABL1	ABL1	.	TRUE	.	.	TRUE
chr9_131393697_131394299	chr9	131393697	131394299	-36092	PRRC2B	PRRC2B	.	TRUE	.	TRUE	.
chr9_131395231_131395732	chr9	131395231	131395732	-34609	PRRC2B	PRRC2B	.	TRUE	.	.	.
chr9_131402712_131403213	chr9	131402712	131403213	-27128	PRRC2B	PRRC2B	.	TRUE	.	TRUE	.
chr9_131407788_131408289	chr9	131407788	131408289	-22052	PRRC2B	PRRC2B	.	TRUE	.	.	.
chr9_131418408_131418909	chr9	131418408	131418909	-11432	PRRC2B	PRRC2B	.	TRUE	.	.	.
chr9_131422394_131422895	chr9	131422394	131422895	-7446	PRRC2B	PRRC2B	.	TRUE	.	TRUE	.
chr9_133250877_133251378	chr9	133250877	133251378	24087	ABO	ABO	.	TRUE	.	TRUE	.
chr9_137305486_137305987	chr9	137305486	137305987	-3485	NRARP	NRARP	.	TRUE	.	TRUE	.
chrX_11007090_11007591	chrX	11007090	11007591	-103946	HCCS	HCCS	.	TRUE	.	TRUE	.
chrX_37472779_37473280	chrX	37472779	37473280	-98540	LANCL3	LANCL3	.	TRUE	.	.	TRUE
chrX_65093566_65094266	chrX	65093566	65094266	-59172	ZC4H2	ZC4H2	.	TRUE	.	TRUE	.
chrX_65163486_65163987	chrX	65163486	65163987	-128992	ZC4H2	ZC4H2	.	TRUE	.	TRUE	.
chrX_65588062_65588563	chrX	65588062	65588563	-35891	FRMD8P1	FRMD8P1	.	TRUE	.	TRUE	TRUE
chrX_100994360_100994861	chrX	100994360	100994861	24902	ARL13A	ARL13A	.	TRUE	.	.	TRUE
chrX_136909043_136910478	chrX	136909043	136910478	-28980	RBMX	RBMX	.	TRUE	.	TRUE	.
chrX_136925218_136925901	chrX	136925218	136925901	-44779	RBMX	RBMX	.	TRUE	.	TRUE	.
chr1_1122032_1122533	chr1	1122032	1122533	-5926	C1orf159	C1orf159	.	.	TRUE	.	.
chr1_1123110_1123611	chr1	1123110	1123611	-7004	C1orf159	C1orf159	.	.	TRUE	.	.
chr1_1130121_1130622	chr1	1130121	1130622	-6646	LINC01342	LINC01342	.	.	TRUE	.	.
chr1_1132477_1132978	chr1	1132477	1132978	-4290	LINC01342	LINC01342	.	.	TRUE	.	.
chr1_1133326_1133827	chr1	1133326	1133827	-3441	LINC01342	LINC01342	.	.	TRUE	.	.
chr1_1150016_1150549	chr1	1150016	1150549	13265	LINC01342	LINC01342	.	.	TRUE	.	.
chr1_1162549_1163115	chr1	1162549	1163115	-4272	MIR200B	MIR200B	.	.	TRUE	.	.
chr1_3482131_3482632	chr1	3482131	3482632	27798	ARHGEF16	ARHGEF16	.	.	TRUE	.	.
chr1_15431094_15431595	chr1	15431094	15431595	-7098	CTRC	CTRC	.	.	TRUE	.	.
chr1_16165389_16165890	chr1	16165389	16165890	-9530	EPHA2	EPHA2	.	.	TRUE	.	.
chr1_16217205_16217794	chr1	16217205	16217794	-4828	ARHGEF19	ARHGEF19	.	.	TRUE	.	.
chr1_16226681_16227182	chr1	16226681	16227182	10233	CPLANE2	CPLANE2	.	.	TRUE	.	.
chr1_17513093_17513594	chr1	17513093	17513594	-26492	ARHGEF10L	ARHGEF10L	.	.	TRUE	.	.
chr1_17519963_17520574	chr1	17519963	17520574	-19567	ARHGEF10L	ARHGEF10L	.	.	TRUE	.	.
chr1_17521884_17522385	chr1	17521884	17522385	-17701	ARHGEF10L	ARHGEF10L	.	.	TRUE	.	.
chr1_17529921_17530422	chr1	17529921	17530422	-9664	ARHGEF10L	ARHGEF10L	.	.	TRUE	.	.
chr1_17531684_17532185	chr1	17531684	17532185	-7901	ARHGEF10L	ARHGEF10L	.	.	TRUE	.	.
chr1_22163180_22163835	chr1	22163180	22163835	-20481	WNT4	WNT4	.	.	TRUE	.	.
chr1_22172268_22172769	chr1	22172268	22172769	-29492	WNT4	WNT4	.	.	TRUE	.	.
chr1_23217275_23217776	chr1	23217275	23217776	-22796	HTR1D	HTR1D	.	.	TRUE	.	.
chr1_27001770_27002271	chr1	27001770	27002271	8316	TRNP1	TRNP1	.	.	TRUE	.	.
chr1_27402262_27402763	chr1	27402262	27402763	9868	GPR3	GPR3	.	.	TRUE	.	.
chr1_29145837_29146380	chr1	29145837	29146380	-22199	TMEM200B	TMEM200B	.	.	TRUE	.	.
chr1_31588738_31589239	chr1	31588738	31589239	10843	TINAGL1	TINAGL1	.	.	TRUE	.	.
chr1_32065576_32066077	chr1	32065576	32066077	-6205	TMEM39B	TMEM39B	.	.	TRUE	.	.
chr1_32612073_32612578	chr1	32612073	32612578	38265	ZBTB8OS	ZBTB8OS	.	.	TRUE	.	.
chr1_38728297_38728798	chr1	38728297	38728798	131276	RRAGC	RRAGC	.	.	TRUE	.	.
chr1_46187398_46187914	chr1	46187398	46187914	9843	POMGNT1	POMGNT1	.	.	TRUE	.	.
chr1_48250538_48251039	chr1	48250538	48251039	28103	SLC5A9	SLC5A9	.	.	TRUE	.	.
chr1_48277409_48277910	chr1	48277409	48277910	54974	SLC5A9	SLC5A9	.	.	TRUE	.	.
chr1_48285259_48285760	chr1	48285259	48285760	62824	SLC5A9	SLC5A9	.	.	TRUE	.	.
chr1_51283930_51284431	chr1	51283930	51284431	13781	TTC39A	TTC39A	.	.	TRUE	.	.
chr1_51284482_51284983	chr1	51284482	51284983	13229	TTC39A	TTC39A	.	.	TRUE	.	.
chr1_51551629_51552130	chr1	51551629	51552130	-32556	EPS15	EPS15	.	.	TRUE	.	.
chr1_58583959_58584460	chr1	58583959	58584460	-6715	TACSTD2	TACSTD2	.	.	TRUE	.	.
chr1_61057617_61058118	chr1	61057617	61058118	-19407	NFIA	NFIA	.	.	TRUE	.	.
chr1_94384699_94385200	chr1	94384699	94385200	-33428	ABCD3	ABCD3	.	.	TRUE	.	.
chr1_110243231_110243732	chr1	110243231	110243732	32767	KCNC4	KCNC4	.	.	TRUE	.	.
chr1_112360226_112360727	chr1	112360226	112360727	-35702	CTTNBP2NL	CTTNBP2NL	.	.	TRUE	.	.
chr1_146037580_146038081	chr1	146037580	146038081	14414	RNVU1-6	RNVU1-6	.	.	TRUE	.	.
chr1_153533049_153533550	chr1	153533049	153533550	2942	S100A6	S100A6	.	.	TRUE	.	.
chr1_153598664_153599165	chr1	153598664	153599165	10441	S100A16	S100A16	.	.	TRUE	.	.
chr1_155648455_155648956	chr1	155648455	155648956	30550	SCARNA26A	SCARNA26A	.	.	TRUE	.	.
chr1_155983653_155984154	chr1	155983653	155984154	-4343	ARHGEF2	ARHGEF2	.	.	TRUE	.	.
chr1_155984299_155984800	chr1	155984299	155984800	-4989	ARHGEF2	ARHGEF2	.	.	TRUE	.	.
chr1_155989247_155989820	chr1	155989247	155989820	-9973	ARHGEF2	ARHGEF2	.	.	TRUE	.	.
chr1_156003241_156003803	chr1	156003241	156003803	17445	SSR2	SSR2	.	.	TRUE	.	.
chr1_156141219_156141720	chr1	156141219	156141720	-8475	SEMA4A	SEMA4A	.	.	TRUE	.	.
chr1_156145859_156146360	chr1	156145859	156146360	-3835	SEMA4A	SEMA4A	.	.	TRUE	.	.
chr1_159910325_159910834	chr1	159910325	159910834	-10463	CFAP45	CFAP45	.	.	TRUE	.	.
chr1_159991437_159991938	chr1	159991437	159991938	30463	LINC01133	LINC01133	.	.	TRUE	.	.
chr1_195663851_195664352	chr1	195663851	195664352	424614	LINC01724	LINC01724	.	.	TRUE	.	.
chr1_195721411_195721992	chr1	195721411	195721992	367014	LINC01724	LINC01724	.	.	TRUE	.	.
chr1_200917244_200917745	chr1	200917244	200917745	-11450	MROH3P	MROH3P	.	.	TRUE	.	.
chr1_202017670_202019118	chr1	202017670	202019118	7832	ELF3	ELF3	.	.	TRUE	.	.
chr1_202046367_202046868	chr1	202046367	202046868	36055	ELF3	ELF3	.	.	TRUE	.	.
chr1_202106340_202106899	chr1	202106340	202106899	-16222	GPR37L1	GPR37L1	.	.	TRUE	.	.
chr1_202107101_202107602	chr1	202107101	202107602	-15490	GPR37L1	GPR37L1	.	.	TRUE	.	.
chr1_203429058_203429559	chr1	203429058	203429559	-46447	PRELP	PRELP	.	.	TRUE	.	.
chr1_206005215_206005716	chr1	206005215	206005716	-1999	RAB7B	RAB7B	.	.	TRUE	.	.
chr1_207963253_207964050	chr1	207963253	207964050	-52313	CD34	CD34	.	.	TRUE	.	.
chr1_222754514_222755015	chr1	222754514	222755015	15080	FAM177B	FAM177B	.	.	TRUE	.	.
chr1_226133032_226133588	chr1	226133032	226133588	-14693	ACBD3-AS1	ACBD3-AS1	.	.	TRUE	.	.
chr1_226135055_226135677	chr1	226135055	226135677	-12637	ACBD3-AS1	ACBD3-AS1	.	.	TRUE	.	.
chr1_228121005_228121506	chr1	228121005	228121506	-11943	MRPL55	MRPL55	.	.	TRUE	.	.
chr1_228837890_228838608	chr1	228837890	228838608	103172	RHOU	RHOU	.	.	TRUE	.	.
chr1_229170740_229171241	chr1	229170740	229171241	3811	MIR4454	MIR4454	.	.	TRUE	.	.
chr1_232524059_232524560	chr1	232524059	232524560	-8701	SIPA1L2	SIPA1L2	.	.	TRUE	.	.
chr1_232538172_232538673	chr1	232538172	232538673	-22814	SIPA1L2	SIPA1L2	.	.	TRUE	.	.
chr1_232553293_232553794	chr1	232553293	232553794	-37935	SIPA1L2	SIPA1L2	.	.	TRUE	.	.
chr1_232557001_232557502	chr1	232557001	232557502	-41643	SIPA1L2	SIPA1L2	.	.	TRUE	.	.
chr1_232600644_232601145	chr1	232600644	232601145	-85286	SIPA1L2	SIPA1L2	.	.	TRUE	.	.
chr1_232614046_232614547	chr1	232614046	232614547	-98688	SIPA1L2	SIPA1L2	.	.	TRUE	.	.
chr1_232622407_232623123	chr1	232622407	232623123	-95306	LINC01745	LINC01745	.	.	TRUE	.	.
chr1_232627565_232628066	chr1	232627565	232628066	-90256	LINC01745	LINC01745	.	.	TRUE	.	.
chr10_3774136_3774637	chr10	3774136	3774637	10895	KLF6	KLF6	.	.	TRUE	.	.
chr10_4981822_4982323	chr10	4981822	4982323	18810	AKR1C1	AKR1C1	.	.	TRUE	.	.
chr10_4982656_4983159	chr10	4982656	4983159	19645	AKR1C1	AKR1C1	.	.	TRUE	.	.
chr10_5023059_5023560	chr10	5023059	5023560	-5276	AKR1C2	AKR1C2	.	.	TRUE	.	.
chr10_13302061_13302564	chr10	13302061	13302564	-2182	PHYH	PHYH	.	.	TRUE	.	.
chr10_14507082_14507696	chr10	14507082	14507696	25321	FAM107B	FAM107B	.	.	TRUE	.	.
chr10_23448741_23449242	chr10	23448741	23449242	9722	OTUD1	OTUD1	.	.	TRUE	.	.
chr10_31936906_31937424	chr10	31936906	31937424	-8289	ARHGAP12	ARHGAP12	.	.	TRUE	.	.
chr10_53030028_53030529	chr10	53030028	53030529	-258578	MBL2	MBL2	.	.	TRUE	.	.
chr10_72364248_72364749	chr10	72364248	72364749	-9349	DNAJB12	DNAJB12	.	.	TRUE	.	.
chr10_86400312_86400943	chr10	86400312	86400943	-34134	GRID1	GRID1	.	.	TRUE	.	.
chr10_94747826_94748327	chr10	94747826	94748327	-14605	CYP2C19	CYP2C19	.	.	TRUE	.	.
chr10_94857921_94858422	chr10	94857921	94858422	-80487	CYP2C9	CYP2C9	.	.	TRUE	.	.
chr10_94892329_94892830	chr10	94892329	94892830	-46079	CYP2C9	CYP2C9	.	.	TRUE	.	.
chr10_94902541_94903086	chr10	94902541	94903086	-35845	CYP2C9	CYP2C9	.	.	TRUE	.	.
chr10_96124481_96124982	chr10	96124481	96124982	-4984	ZNF518A	ZNF518A	.	.	TRUE	.	.
chr10_100969297_100969798	chr10	100969297	100969798	-2982	SEMA4G	SEMA4G	.	.	TRUE	.	.
chr10_100970010_100970511	chr10	100970010	100970511	-2269	SEMA4G	SEMA4G	.	.	TRUE	.	.
chr10_110141127_110141628	chr10	110141127	110141628	-66228	MXI1	MXI1	.	.	TRUE	.	.
chr10_110141987_110142488	chr10	110141987	110142488	-65368	MXI1	MXI1	.	.	TRUE	.	.
chr10_114081992_114082493	chr10	114081992	114082493	38195	ADRB1	ADRB1	.	.	TRUE	.	.
chr10_114082894_114083427	chr10	114082894	114083427	39113	ADRB1	ADRB1	.	.	TRUE	.	.
chr10_120978412_120978913	chr10	120978412	120978913	-127483	WDR11-AS1	WDR11-AS1	.	.	TRUE	.	.
chr10_120979302_120980104	chr10	120979302	120980104	-128524	WDR11-AS1	WDR11-AS1	.	.	TRUE	.	.
chr10_120987296_120987797	chr10	120987296	120987797	-136367	WDR11-AS1	WDR11-AS1	.	.	TRUE	.	.
chr10_120989937_120990438	chr10	120989937	120990438	-139008	WDR11-AS1	WDR11-AS1	.	.	TRUE	.	.
chr10_120996393_120997006	chr10	120996393	120997006	-145520	WDR11-AS1	WDR11-AS1	.	.	TRUE	.	.
chr10_122267825_122268326	chr10	122267825	122268326	-3221	BTBD16	BTBD16	.	.	TRUE	.	.
chr10_132418692_132419332	chr10	132418692	132419332	21814	PWWP2B	PWWP2B	.	.	TRUE	.	.
chr10_132421304_132421888	chr10	132421304	132421888	-23593	C10orf91	C10orf91	.	.	TRUE	.	.
chr10_132422235_132422736	chr10	132422235	132422736	-22704	C10orf91	C10orf91	.	.	TRUE	.	.
chr10_132457527_132458028	chr10	132457527	132458028	12588	C10orf91	C10orf91	.	.	TRUE	.	.
chr10_132458848_132459457	chr10	132458848	132459457	13963	C10orf91	C10orf91	.	.	TRUE	.	.
chr11_3455579_3456080	chr11	3455579	3456080	-63914	OR7E12P	OR7E12P	.	.	TRUE	.	.
chr11_3476895_3477396	chr11	3476895	3477396	-85230	OR7E12P	OR7E12P	.	.	TRUE	.	.
chr11_3580130_3580631	chr11	3580130	3580631	-8393	LOC101927708	LOC101927708	.	.	TRUE	.	.
chr11_3581000_3581587	chr11	3581000	3581587	-9306	LOC101927708	LOC101927708	.	.	TRUE	.	.
chr11_6443332_6443858	chr11	6443332	6443858	-2571	HPX	HPX	.	.	TRUE	.	.
chr11_7663464_7663965	chr11	7663464	7663965	9177	CYB5R2	CYB5R2	.	.	TRUE	.	.
chr11_22976074_22976575	chr11	22976074	22976575	-115898	CCDC179	CCDC179	.	.	TRUE	.	.
chr11_23113030_23114073	chr11	23113030	23114073	-253125	CCDC179	CCDC179	.	.	TRUE	.	.
chr11_57480235_57480736	chr11	57480235	57480736	19948	RTN4RL2	RTN4RL2	.	.	TRUE	.	.
chr11_64851139_64851640	chr11	64851139	64851640	-6820	CDC42BPG	CDC42BPG	.	.	TRUE	.	.
chr11_65448554_65449055	chr11	65448554	65449055	4346	MIR612	MIR612	.	.	TRUE	.	.
chr11_67946279_67946780	chr11	67946279	67946780	57596	UNC93B1	UNC93B1	.	.	TRUE	.	.
chr11_67955669_67956170	chr11	67955669	67956170	48206	UNC93B1	UNC93B1	.	.	TRUE	.	.
chr11_112105927_112106428	chr11	112105927	112106428	19353	SDHD	SDHD	.	.	TRUE	.	.
chr11_112368342_112368843	chr11	112368342	112368843	97843	LOC283140	LOC283140	.	.	TRUE	.	.
chr11_118129776_118130277	chr11	118129776	118130277	15443	SCN4B	SCN4B	.	.	TRUE	.	.
chr11_118921969_118922470	chr11	118921969	118922470	-11315	BCL9L	BCL9L	.	.	TRUE	.	.
chr11_119906969_119907534	chr11	119906969	119907534	177668	LOC102724301	LOC102724301	.	.	TRUE	.	.
chr11_119919610_119920111	chr11	119919610	119920111	190277	LOC102724301	LOC102724301	.	.	TRUE	.	.
chr11_129861741_129862242	chr11	129861741	129862242	31018	NFRKB	NFRKB	.	.	TRUE	.	.
chr11_130213030_130213531	chr11	130213030	130213531	53493	ST14	ST14	.	.	TRUE	.	.
chr12_689467_689968	chr12	689467	689968	-25976	NINJ2	NINJ2	.	.	TRUE	.	.
chr12_6345290_6345791	chr12	6345290	6345791	-3423	TNFRSF1A	TNFRSF1A	.	.	TRUE	.	.
chr12_13386975_13387577	chr12	13386975	13387577	-10531	LINC01559	LINC01559	.	.	TRUE	.	.
chr12_18247347_18247848	chr12	18247347	18247848	-13943	PIK3C2G	PIK3C2G	.	.	TRUE	.	.
chr12_22693038_22693539	chr12	22693038	22693539	68146	ETNK1	ETNK1	.	.	TRUE	.	.
chr12_30822269_30823169	chr12	30822269	30823169	27038	LINC00941	LINC00941	.	.	TRUE	.	.
chr12_32399162_32400028	chr12	32399162	32400028	-86377	FGD4	FGD4	.	.	TRUE	.	.
chr12_49358572_49359073	chr12	49358572	49359073	-8083	SPATS2	SPATS2	.	.	TRUE	.	.
chr12_49966927_49967714	chr12	49966927	49967714	-4396	LOC101927318	LOC101927318	.	.	TRUE	.	.
chr12_52895317_52896284	chr12	52895317	52896284	9284	KRT8	KRT8	.	.	TRUE	.	.
chr12_54134847_54135348	chr12	54134847	54135348	9026	LINC02381	LINC02381	.	.	TRUE	.	.
chr12_54135483_54136006	chr12	54135483	54136006	9673	LINC02381	LINC02381	.	.	TRUE	.	.
chr12_54147101_54147602	chr12	54147101	54147602	21280	LINC02381	LINC02381	.	.	TRUE	.	.
chr12_58860252_58860753	chr12	58860252	58860753	59044	LRIG3	LRIG3	.	.	TRUE	.	.
chr12_58925650_58926151	chr12	58925650	58926151	-5362	LRIG3	LRIG3	.	.	TRUE	.	.
chr12_91876989_91877851	chr12	91876989	91877851	264293	LINC01619	LINC01619	.	.	TRUE	.	.
chr12_95641491_95641992	chr12	95641491	95641992	-7514	PGAM1P5	PGAM1P5	.	.	TRUE	.	.
chr12_95642558_95643072	chr12	95642558	95643072	-6440	PGAM1P5	PGAM1P5	.	.	TRUE	.	.
chr12_109131101_109131602	chr12	109131101	109131602	-8046	ACACB	ACACB	.	.	TRUE	.	.
chr12_111813040_111813541	chr12	111813040	111813541	13456	MIR6761	MIR6761	.	.	TRUE	.	.
chr12_126030380_126030881	chr12	126030380	126030881	-47256	LINC00939	LINC00939	.	.	TRUE	.	.
chr12_126033765_126034266	chr12	126033765	126034266	-50641	LINC00939	LINC00939	.	.	TRUE	.	.
chr12_131234519_131235020	chr12	131234519	131235020	63203	LINC02415	LINC02415	.	.	TRUE	.	.
chr13_27533057_27533585	chr13	27533057	27533585	-82719	MTIF3	MTIF3	.	.	TRUE	.	.
chr13_27933480_27933981	chr13	27933480	27933981	13699	PDX1	PDX1	.	.	TRUE	.	.
chr13_31965633_31966134	chr13	31965633	31966134	-65417	FRY	FRY	.	.	TRUE	.	.
chr13_31980831_31981332	chr13	31980831	31981332	-50219	FRY	FRY	.	.	TRUE	.	.
chr13_31982235_31982736	chr13	31982235	31982736	-48815	FRY	FRY	.	.	TRUE	.	.
chr13_31998082_31998604	chr13	31998082	31998604	-32957	FRY	FRY	.	.	TRUE	.	.
chr13_32001231_32001732	chr13	32001231	32001732	-29819	FRY	FRY	.	.	TRUE	.	.
chr13_32008410_32008911	chr13	32008410	32008911	-22640	FRY	FRY	.	.	TRUE	.	.
chr13_32019555_32020056	chr13	32019555	32020056	-11495	FRY	FRY	.	.	TRUE	.	.
chr13_51896242_51896743	chr13	51896242	51896743	34544	CCDC70	CCDC70	.	.	TRUE	.	.
chr13_51912079_51912580	chr13	51912079	51912580	50381	CCDC70	CCDC70	.	.	TRUE	.	.
chr13_51923924_51924425	chr13	51923924	51924425	62226	CCDC70	CCDC70	.	.	TRUE	.	.
chr13_97141482_97142000	chr13	97141482	97142000	37881	LINC00456	LINC00456	.	.	TRUE	.	.
chr13_97191047_97191548	chr13	97191047	97191548	-11675	LINC00456	LINC00456	.	.	TRUE	.	.
chr14_22821953_22822454	chr14	22821953	22822454	-2392	SLC7A7	SLC7A7	.	.	TRUE	.	.
chr14_24422816_24423317	chr14	24422816	24423317	-6220	KHNYN	KHNYN	.	.	TRUE	.	.
chr14_37566705_37567482	chr14	37566705	37567482	28027	FOXA1	FOXA1	.	.	TRUE	.	.
chr14_37588229_37588730	chr14	37588229	37588730	6641	FOXA1	FOXA1	.	.	TRUE	.	.
chr14_55103043_55103587	chr14	55103043	55103587	-25902	LGALS3	LGALS3	.	.	TRUE	.	.
chr14_65267131_65267634	chr14	65267131	65267634	-45035	LINC02324	LINC02324	.	.	TRUE	.	.
chr14_66403124_66403649	chr14	66403124	66403649	-82985	CCDC196	CCDC196	.	.	TRUE	.	.
chr14_66483234_66483735	chr14	66483234	66483735	-2887	CCDC196	CCDC196	.	.	TRUE	.	.
chr14_73228199_73228700	chr14	73228199	73228700	-9048	PAPLN	PAPLN	.	.	TRUE	.	.
chr14_75254446_75255078	chr14	75254446	75255078	-24016	FOS	FOS	.	.	TRUE	.	.
chr14_75258830_75259402	chr14	75258830	75259402	-19662	FOS	FOS	.	.	TRUE	.	.
chr14_75283219_75283811	chr14	75283219	75283811	4737	FOS	FOS	.	.	TRUE	.	.
chr14_75474116_75474617	chr14	75474116	75474617	42232	JDP2	JDP2	.	.	TRUE	.	.
chr14_95500104_95500605	chr14	95500104	95500605	-24518	SYNE3	SYNE3	.	.	TRUE	.	.
chr14_100145069_100145581	chr14	100145069	100145581	14350	DEGS2	DEGS2	.	.	TRUE	.	.
chr14_100534056_100534557	chr14	100534056	100534557	33764	BEGAIN	BEGAIN	.	.	TRUE	.	.
chr14_104680704_104681205	chr14	104680704	104681205	-3205	MIR4710	MIR4710	.	.	TRUE	.	.
chr14_104681648_104682149	chr14	104681648	104682149	-4149	MIR4710	MIR4710	.	.	TRUE	.	.
chr14_105481591_105482359	chr14	105481591	105482359	4729	CRIP2	CRIP2	.	.	TRUE	.	.
chr15_42138907_42139408	chr15	42138907	42139408	17484	PLA2G4F	PLA2G4F	.	.	TRUE	.	.
chr15_43122794_43123365	chr15	43122794	43123365	-10036	TMEM62	TMEM62	.	.	TRUE	.	.
chr15_59410367_59410868	chr15	59410367	59410868	-27556	FAM81A	FAM81A	.	.	TRUE	.	.
chr15_59555672_59556173	chr15	59555672	59556173	-55861	GCNT3	GCNT3	.	.	TRUE	.	.
chr15_59567340_59567841	chr15	59567340	59567841	-44193	GCNT3	GCNT3	.	.	TRUE	.	.
chr15_59622209_59622725	chr15	59622209	59622725	10684	GCNT3	GCNT3	.	.	TRUE	.	.
chr15_59632685_59633186	chr15	59632685	59633186	21152	GCNT3	GCNT3	.	.	TRUE	.	.
chr15_62390240_62390749	chr15	62390240	62390749	47465	MIR6085	MIR6085	.	.	TRUE	.	.
chr15_62391663_62392209	chr15	62391663	62392209	48907	MIR6085	MIR6085	.	.	TRUE	.	.
chr15_62472851_62473352	chr15	62472851	62473352	130072	MIR6085	MIR6085	.	.	TRUE	.	.
chr15_62496081_62496582	chr15	62496081	62496582	148850	MGC15885	MGC15885	.	.	TRUE	.	.
chr15_62537466_62537967	chr15	62537466	62537967	107465	MGC15885	MGC15885	.	.	TRUE	.	.
chr15_62545525_62546026	chr15	62545525	62546026	99406	MGC15885	MGC15885	.	.	TRUE	.	.
chr15_62561141_62561642	chr15	62561141	62561642	83790	MGC15885	MGC15885	.	.	TRUE	.	.
chr15_62591562_62592063	chr15	62591562	62592063	53369	MGC15885	MGC15885	.	.	TRUE	.	.
chr15_62592317_62592818	chr15	62592317	62592818	52614	MGC15885	MGC15885	.	.	TRUE	.	.
chr15_62594039_62594540	chr15	62594039	62594540	50892	MGC15885	MGC15885	.	.	TRUE	.	.
chr15_62624657_62625158	chr15	62624657	62625158	20274	MGC15885	MGC15885	.	.	TRUE	.	.
chr15_66866001_66866502	chr15	66866001	66866502	90264	LINC02206	LINC02206	.	.	TRUE	.	.
chr15_71093262_71093787	chr15	71093262	71093787	21976	CT62	CT62	.	.	TRUE	.	.
chr15_72155244_72155745	chr15	72155244	72155745	37204	SENP8	SENP8	.	.	TRUE	.	.
chr15_72155982_72156483	chr15	72155982	72156483	37942	SENP8	SENP8	.	.	TRUE	.	.
chr15_76206481_76206982	chr15	76206481	76206982	-25245	LOC101929439	LOC101929439	.	.	TRUE	.	.
chr15_79831575_79832076	chr15	79831575	79832076	65172	MTHFS	MTHFS	.	.	TRUE	.	.
chr15_85838569_85839116	chr15	85838569	85839116	13207	MIR548AP	MIR548AP	.	.	TRUE	.	.
chr15_88657293_88657794	chr15	88657293	88657794	18800	ISG20	ISG20	.	.	TRUE	.	.
chr15_90161065_90161566	chr15	90161065	90161566	-23605	SEMA4B	SEMA4B	.	.	TRUE	.	.
chr15_90293307_90293880	chr15	90293307	90293880	-27834	CIB1	CIB1	.	.	TRUE	.	.
chr16_2904100_2904612	chr16	2904100	2904612	-7623	FLYWCH1	FLYWCH1	.	.	TRUE	.	.
chr16_52611891_52612454	chr16	52611891	52612454	-5197	CASC16	CASC16	.	.	TRUE	.	.
chr16_63119927_63120428	chr16	63119927	63120428	-1083342	CDH8	CDH8	.	.	TRUE	.	.
chr16_63129460_63129961	chr16	63129460	63129961	-1092875	CDH8	CDH8	.	.	TRUE	.	.
chr16_63289761_63290296	chr16	63289761	63290296	-1253193	CDH8	CDH8	.	.	TRUE	.	.
chr16_63388150_63388651	chr16	63388150	63388651	-1351565	CDH8	CDH8	.	.	TRUE	.	.
chr16_63614385_63614886	chr16	63614385	63614886	1507502	CDH11	CDH11	.	.	TRUE	.	.
chr16_63617334_63618381	chr16	63617334	63618381	1504280	CDH11	CDH11	.	.	TRUE	.	.
chr16_66872960_66873563	chr16	66872960	66873563	-7100	PDP2	PDP2	.	.	TRUE	.	.
chr16_75498889_75499390	chr16	75498889	75499390	-4111	CHST6	CHST6	.	.	TRUE	.	.
chr16_75506501_75507002	chr16	75506501	75507002	-11723	CHST6	CHST6	.	.	TRUE	.	.
chr16_75509326_75509827	chr16	75509326	75509827	-14548	CHST6	CHST6	.	.	TRUE	.	.
chr16_75515413_75515914	chr16	75515413	75515914	19507	CHST5	CHST5	.	.	TRUE	.	.
chr16_75516890_75517675	chr16	75516890	75517675	17888	CHST5	CHST5	.	.	TRUE	.	.
chr16_85370732_85371298	chr16	85370732	85371298	-64690	MIR5093	MIR5093	.	.	TRUE	.	.
chr16_85372692_85373193	chr16	85372692	85373193	-66617	MIR5093	MIR5093	.	.	TRUE	.	.
chr16_85378884_85379385	chr16	85378884	85379385	-72809	MIR5093	MIR5093	.	.	TRUE	.	.
chr16_85384766_85385317	chr16	85384766	85385317	-78716	MIR5093	MIR5093	.	.	TRUE	.	.
chr16_85390735_85391236	chr16	85390735	85391236	-84660	MIR5093	MIR5093	.	.	TRUE	.	.
chr16_85395428_85395929	chr16	85395428	85395929	-89353	MIR5093	MIR5093	.	.	TRUE	.	.
chr16_85397396_85397897	chr16	85397396	85397897	-91321	MIR5093	MIR5093	.	.	TRUE	.	.
chr16_85416273_85416774	chr16	85416273	85416774	-110198	MIR5093	MIR5093	.	.	TRUE	.	.
chr16_85420604_85421105	chr16	85420604	85421105	-114529	MIR5093	MIR5093	.	.	TRUE	.	.
chr16_85422561_85423158	chr16	85422561	85423158	-116534	MIR5093	MIR5093	.	.	TRUE	.	.
chr16_85428122_85428623	chr16	85428122	85428623	-122047	MIR5093	MIR5093	.	.	TRUE	.	.
chr16_85437065_85437784	chr16	85437065	85437784	-131099	MIR5093	MIR5093	.	.	TRUE	.	.
chr16_85444996_85445497	chr16	85444996	85445497	-138921	MIR5093	MIR5093	.	.	TRUE	.	.
chr16_85448779_85449280	chr16	85448779	85449280	-142704	MIR5093	MIR5093	.	.	TRUE	.	.
chr16_85453123_85453624	chr16	85453123	85453624	-147048	MIR5093	MIR5093	.	.	TRUE	.	.
chr16_85461712_85462213	chr16	85461712	85462213	-149461	GSE1	GSE1	.	.	TRUE	.	.
chr16_85462409_85462910	chr16	85462409	85462910	-148764	GSE1	GSE1	.	.	TRUE	.	.
chr16_85472001_85472502	chr16	85472001	85472502	-139172	GSE1	GSE1	.	.	TRUE	.	.
chr16_85473884_85474385	chr16	85473884	85474385	-137289	GSE1	GSE1	.	.	TRUE	.	.
chr16_85477926_85478427	chr16	85477926	85478427	-133247	GSE1	GSE1	.	.	TRUE	.	.
chr16_85480207_85480708	chr16	85480207	85480708	-130966	GSE1	GSE1	.	.	TRUE	.	.
chr16_85484298_85484799	chr16	85484298	85484799	-126875	GSE1	GSE1	.	.	TRUE	.	.
chr16_85486172_85486673	chr16	85486172	85486673	-125001	GSE1	GSE1	.	.	TRUE	.	.
chr16_85491960_85492461	chr16	85491960	85492461	-119213	GSE1	GSE1	.	.	TRUE	.	.
chr16_85498549_85499050	chr16	85498549	85499050	-112624	GSE1	GSE1	.	.	TRUE	.	.
chr16_85514614_85515115	chr16	85514614	85515115	-96559	GSE1	GSE1	.	.	TRUE	.	.
chr16_85515990_85516491	chr16	85515990	85516491	-95183	GSE1	GSE1	.	.	TRUE	.	.
chr16_85520807_85521308	chr16	85520807	85521308	-90366	GSE1	GSE1	.	.	TRUE	.	.
chr16_85523551_85524052	chr16	85523551	85524052	-87622	GSE1	GSE1	.	.	TRUE	.	.
chr16_85525169_85525670	chr16	85525169	85525670	-86004	GSE1	GSE1	.	.	TRUE	.	.
chr16_85535168_85535669	chr16	85535168	85535669	-76005	GSE1	GSE1	.	.	TRUE	.	.
chr16_85535983_85536484	chr16	85535983	85536484	-75190	GSE1	GSE1	.	.	TRUE	.	.
chr16_89052146_89052647	chr16	89052146	89052647	-41413	ACSF3	ACSF3	.	.	TRUE	.	.
chr17_7836580_7837081	chr17	7836580	7837081	-3076	KDM6B	KDM6B	.	.	TRUE	.	.
chr17_10844399_10844900	chr17	10844399	10844900	-6548	PIRT	PIRT	.	.	TRUE	.	.
chr17_10844940_10845551	chr17	10844940	10845551	-7144	PIRT	PIRT	.	.	TRUE	.	.
chr17_15622093_15622594	chr17	15622093	15622594	-2639	CDRT1	CDRT1	.	.	TRUE	.	.
chr17_16332972_16333473	chr17	16332972	16333473	20276	CENPV	CENPV	.	.	TRUE	.	.
chr17_28233207_28233708	chr17	28233207	28233708	6894	PYY2	PYY2	.	.	TRUE	.	.
chr17_31549646_31550435	chr17	31549646	31550435	-9956	MIR193A	MIR193A	.	.	TRUE	.	.
chr17_32943168_32943669	chr17	32943168	32943669	15508	TMEM98	TMEM98	.	.	TRUE	.	.
chr17_41521096_41521597	chr17	41521096	41521597	-2328	KRT15	KRT15	.	.	TRUE	.	.
chr17_41521729_41522523	chr17	41521729	41522523	-3108	KRT15	KRT15	.	.	TRUE	.	.
chr17_41655531_41656060	chr17	41655531	41656060	-15596	KRT42P	KRT42P	.	.	TRUE	.	.
chr17_47960196_47960775	chr17	47960196	47960775	-2608	PRR15L	PRR15L	.	.	TRUE	.	.
chr17_47965916_47966550	chr17	47965916	47966550	-4295	CDK5RAP3	CDK5RAP3	.	.	TRUE	.	.
chr17_48585557_48586058	chr17	48585557	48586058	-3185	HOXB3	HOXB3	.	.	TRUE	.	.
chr17_50757020_50757534	chr17	50757020	50757534	10280	LINC00483	LINC00483	.	.	TRUE	.	.
chr17_50942170_50942671	chr17	50942170	50942671	-74442	TOB1	TOB1	.	.	TRUE	.	.
chr17_50943872_50944373	chr17	50943872	50944373	-76144	TOB1	TOB1	.	.	TRUE	.	.
chr17_50949709_50950696	chr17	50949709	50950696	-82224	TOB1	TOB1	.	.	TRUE	.	.
chr17_56110647_56111240	chr17	56110647	56111240	-42532	ANKFN1	ANKFN1	.	.	TRUE	.	.
chr17_73956944_73957445	chr17	73956944	73957445	-128657	LINC00469	LINC00469	.	.	TRUE	.	.
chr17_74373815_74374316	chr17	74373815	74374316	6559	GPR142	GPR142	.	.	TRUE	.	.
chr17_75159245_75159746	chr17	75159245	75159746	-4812	JPT1	JPT1	.	.	TRUE	.	.
chr17_78317433_78317934	chr17	78317433	78317934	-39191	LINC01993	LINC01993	.	.	TRUE	.	.
chr17_78329363_78329864	chr17	78329363	78329864	30466	SOCS3	SOCS3	.	.	TRUE	.	.
chr17_78341584_78342148	chr17	78341584	78342148	18213	SOCS3	SOCS3	.	.	TRUE	.	.
chr17_81727136_81727681	chr17	81727136	81727681	15172	SLC25A10	SLC25A10	.	.	TRUE	.	.
chr17_81733660_81734173	chr17	81733660	81734173	21680	SLC25A10	SLC25A10	.	.	TRUE	.	.
chr18_22210137_22210638	chr18	22210137	22210638	40950	GATA6	GATA6	.	.	TRUE	.	.
chr18_54717589_54718090	chr18	54717589	54718090	-110638	RAB27B	RAB27B	.	.	TRUE	.	.
chr18_74251403_74251904	chr18	74251403	74251904	40363	CYB5A	CYB5A	.	.	TRUE	.	.
chr19_267115_267616	chr19	267115	267616	23804	PLPP2	PLPP2	.	.	TRUE	.	.
chr19_295047_295548	chr19	295047	295548	-3862	PLPP2	PLPP2	.	.	TRUE	.	.
chr19_1747582_1748531	chr19	1747582	1748531	-5607	ONECUT3	ONECUT3	.	.	TRUE	.	.
chr19_3210638_3211139	chr19	3210638	3211139	-13815	CELF5	CELF5	.	.	TRUE	.	.
chr19_3482935_3483436	chr19	3482935	3483436	-2643	SMIM24	SMIM24	.	.	TRUE	.	.
chr19_5803852_5804392	chr19	5803852	5804392	-12884	DUS3L	DUS3L	.	.	TRUE	.	.
chr19_12266270_12266771	chr19	12266270	12266771	28092	ZNF44	ZNF44	.	.	TRUE	.	.
chr19_13838985_13839486	chr19	13838985	13839486	-2576	MIR23A	MIR23A	.	.	TRUE	.	.
chr19_13839529_13840030	chr19	13839529	13840030	-3120	MIR23A	MIR23A	.	.	TRUE	.	.
chr19_13840416_13840947	chr19	13840416	13840947	-4022	MIR23A	MIR23A	.	.	TRUE	.	.
chr19_13850321_13850822	chr19	13850321	13850822	-11492	NANOS3	NANOS3	.	.	TRUE	.	.
chr19_15584532_15585069	chr19	15584532	15585069	-30418	CYP4F8	CYP4F8	.	.	TRUE	.	.
chr19_17865635_17866157	chr19	17865635	17866157	3308	SNORA68	SNORA68	.	.	TRUE	.	.
chr19_35434433_35434934	chr19	35434433	35434934	-15032	FFAR2	FFAR2	.	.	TRUE	.	.
chr19_41705404_41705905	chr19	41705404	41705905	-2931	CEACAM5	CEACAM5	.	.	TRUE	.	.
chr19_43765174_43765675	chr19	43765174	43765675	-10388	SMG9	SMG9	.	.	TRUE	.	.
chr19_50187915_50188416	chr19	50187915	50188416	-15463	MYH14	MYH14	.	.	TRUE	.	.
chr19_50190406_50190989	chr19	50190406	50190989	-12931	MYH14	MYH14	.	.	TRUE	.	.
chr19_52924120_52924621	chr19	52924120	52924621	-6439	ZNF888	ZNF888	.	.	TRUE	.	.
chr2_8539854_8540355	chr2	8539854	8540355	43688	LINC01814	LINC01814	.	.	TRUE	.	.
chr2_9102928_9103601	chr2	9102928	9103601	-99514	MBOAT2	MBOAT2	.	.	TRUE	.	.
chr2_9107475_9107976	chr2	9107475	9107976	-99040	ASAP2	ASAP2	.	.	TRUE	.	.
chr2_13521941_13522442	chr2	13521941	13522442	-515178	LOC100506474	LOC100506474	.	.	TRUE	.	.
chr2_13523141_13523646	chr2	13523141	13523646	-516380	LOC100506474	LOC100506474	.	.	TRUE	.	.
chr2_13532044_13532545	chr2	13532044	13532545	-525281	LOC100506474	LOC100506474	.	.	TRUE	.	.
chr2_13533097_13533953	chr2	13533097	13533953	-526512	LOC100506474	LOC100506474	.	.	TRUE	.	.
chr2_14654674_14655175	chr2	14654674	14655175	22241	FAM84A	FAM84A	.	.	TRUE	.	.
chr2_18682662_18683163	chr2	18682662	18683163	-93332	NT5C1B	NT5C1B	.	.	TRUE	.	.
chr2_18684527_18685028	chr2	18684527	18685028	-95197	NT5C1B	NT5C1B	.	.	TRUE	.	.
chr2_18777142_18777643	chr2	18777142	18777643	-187812	NT5C1B	NT5C1B	.	.	TRUE	.	.
chr2_18800500_18801001	chr2	18800500	18801001	-211170	NT5C1B	NT5C1B	.	.	TRUE	.	.
chr2_18824349_18824929	chr2	18824349	18824929	202332	LINC01376	LINC01376	.	.	TRUE	.	.
chr2_18830960_18831461	chr2	18830960	18831461	195761	LINC01376	LINC01376	.	.	TRUE	.	.
chr2_18836474_18836975	chr2	18836474	18836975	190247	LINC01376	LINC01376	.	.	TRUE	.	.
chr2_18842856_18843357	chr2	18842856	18843357	183865	LINC01376	LINC01376	.	.	TRUE	.	.
chr2_18854964_18855465	chr2	18854964	18855465	171757	LINC01376	LINC01376	.	.	TRUE	.	.
chr2_18899835_18900336	chr2	18899835	18900336	126886	LINC01376	LINC01376	.	.	TRUE	.	.
chr2_18970696_18971224	chr2	18970696	18971224	56011	LINC01376	LINC01376	.	.	TRUE	.	.
chr2_18971569_18972070	chr2	18971569	18972070	55152	LINC01376	LINC01376	.	.	TRUE	.	.
chr2_19073491_19073992	chr2	19073491	19073992	-46770	LINC01376	LINC01376	.	.	TRUE	.	.
chr2_19089344_19089845	chr2	19089344	19089845	-62623	LINC01376	LINC01376	.	.	TRUE	.	.
chr2_20186363_20186865	chr2	20186363	20186865	38552	SDC1	SDC1	.	.	TRUE	.	.
chr2_24490670_24491532	chr2	24490670	24491532	-93376	NCOA1	NCOA1	.	.	TRUE	.	.
chr2_28381274_28381858	chr2	28381274	28381858	-11346	FOSL2	FOSL2	.	.	TRUE	.	.
chr2_47388161_47388662	chr2	47388161	47388662	10736	MIR559	MIR559	.	.	TRUE	.	.
chr2_68943461_68943985	chr2	68943461	68943985	9247	GKN2	GKN2	.	.	TRUE	.	.
chr2_74405852_74406353	chr2	74405852	74406353	11615	C2orf81	C2orf81	.	.	TRUE	.	.
chr2_91766327_91766828	chr2	91766327	91766828	-8765	GGT8P	GGT8P	.	.	TRUE	.	.
chr2_95293474_95293975	chr2	95293474	95293975	-3600	KCNIP3	KCNIP3	.	.	TRUE	.	.
chr2_102540767_102541311	chr2	102540767	102541311	67736	SLC9A4	SLC9A4	.	.	TRUE	.	.
chr2_105615256_105615757	chr2	105615256	105615757	-4947	LOC285000	LOC285000	.	.	TRUE	.	.
chr2_112864079_112864580	chr2	112864079	112864580	-27550	IL1B	IL1B	.	.	TRUE	.	.
chr2_113157159_113157794	chr2	113157159	113157794	-16507	PSD4	PSD4	.	.	TRUE	.	.
chr2_113167206_113167731	chr2	113167206	113167731	-6515	PSD4	PSD4	.	.	TRUE	.	.
chr2_117536098_117536619	chr2	117536098	117536619	-278321	DDX18	DDX18	.	.	TRUE	.	.
chr2_117555963_117556464	chr2	117555963	117556464	-258466	DDX18	DDX18	.	.	TRUE	.	.
chr2_127400468_127400969	chr2	127400468	127400969	-17702	PROC	PROC	.	.	TRUE	.	.
chr2_134119644_134120215	chr2	134119644	134120215	-7196	MIR3679	MIR3679	.	.	TRUE	.	.
chr2_134120828_134121329	chr2	134120828	134121329	-6047	MIR3679	MIR3679	.	.	TRUE	.	.
chr2_134130062_134130563	chr2	134130062	134130563	3187	MIR3679	MIR3679	.	.	TRUE	.	.
chr2_134178271_134178772	chr2	134178271	134178772	51396	MIR3679	MIR3679	.	.	TRUE	.	.
chr2_134219071_134219572	chr2	134219071	134219572	-34938	MGAT5	MGAT5	.	.	TRUE	.	.
chr2_157488816_157489335	chr2	157488816	157489335	-44983	CYTIP	CYTIP	.	.	TRUE	.	.
chr2_164896583_164897109	chr2	164896583	164897109	-54678	COBLL1	COBLL1	.	.	TRUE	.	.
chr2_168348012_168348513	chr2	168348012	168348513	-100667	STK39	STK39	.	.	TRUE	.	.
chr2_190334684_190335455	chr2	190334684	190335455	-8401	INPP1	INPP1	.	.	TRUE	.	.
chr2_196823690_196824191	chr2	196823690	196824191	-13664	C2orf66	C2orf66	.	.	TRUE	.	.
chr2_203225374_203225875	chr2	203225374	203225875	-12817	CYP20A1	CYP20A1	.	.	TRUE	.	.
chr2_218996009_218996543	chr2	218996009	218996543	-2871	CRYBA2	CRYBA2	.	.	TRUE	.	.
chr2_219049228_219049744	chr2	219049228	219049744	-7935	CFAP65	CFAP65	.	.	TRUE	.	.
chr2_238294608_238295109	chr2	238294608	238295109	-6292	PER2	PER2	.	.	TRUE	.	.
chr2_238299734_238300257	chr2	238299734	238300257	-11429	PER2	PER2	.	.	TRUE	.	.
chr2_238408725_238409226	chr2	238408725	238409226	-17953	ASB1	ASB1	.	.	TRUE	.	.
chr20_3842459_3842960	chr20	3842459	3842960	-4090	MAVS	MAVS	.	.	TRUE	.	.
chr20_10716852_10717353	chr20	10716852	10717353	-35988	LINC01752	LINC01752	.	.	TRUE	.	.
chr20_10864128_10864644	chr20	10864128	10864644	44886	LOC101929413	LOC101929413	.	.	TRUE	.	.
chr20_17611273_17611774	chr20	17611273	17611774	41569	DSTN	DSTN	.	.	TRUE	.	.
chr20_19809431_19809932	chr20	19809431	19809932	-76840	RIN2	RIN2	.	.	TRUE	.	.
chr20_24930977_24931478	chr20	24930977	24931478	-18003	CST7	CST7	.	.	TRUE	.	.
chr20_31593302_31594150	chr20	31593302	31594150	-11557	ID1	ID1	.	.	TRUE	.	.
chr20_31596014_31596515	chr20	31596014	31596515	-9019	ID1	ID1	.	.	TRUE	.	.
chr20_44434090_44434591	chr20	44434090	44434591	16217	LINC01430	LINC01430	.	.	TRUE	.	.
chr20_53939832_53940333	chr20	53939832	53940333	-64373	SUMO1P1	SUMO1P1	.	.	TRUE	.	.
chr20_53942176_53942677	chr20	53942176	53942677	-66717	SUMO1P1	SUMO1P1	.	.	TRUE	.	.
chr21_28554892_28555393	chr21	28554892	28555393	15824	LINC00161	LINC00161	.	.	TRUE	.	.
chr21_33901664_33902165	chr21	33901664	33902165	13940	ATP5PO	ATP5PO	.	.	TRUE	.	.
chr21_36297973_36298474	chr21	36297973	36298474	-21966	MORC3	MORC3	.	.	TRUE	.	.
chr21_36640339_36640840	chr21	36640339	36640840	-58532	SIM2	SIM2	.	.	TRUE	.	.
chr21_36692952_36693453	chr21	36692952	36693453	-5919	SIM2	SIM2	.	.	TRUE	.	.
chr21_38802582_38803083	chr21	38802582	38803083	-2475	ETS2	ETS2	.	.	TRUE	.	.
chr21_39667305_39667806	chr21	39667305	39667806	10235	B3GALT5	B3GALT5	.	.	TRUE	.	.
chr21_39670268_39670769	chr21	39670268	39670769	13198	B3GALT5	B3GALT5	.	.	TRUE	.	.
chr21_42462125_42462626	chr21	42462125	42462626	33979	RSPH1	RSPH1	.	.	TRUE	.	.
chr21_42468596_42469097	chr21	42468596	42469097	27508	RSPH1	RSPH1	.	.	TRUE	.	.
chr21_42469292_42469793	chr21	42469292	42469793	26812	RSPH1	RSPH1	.	.	TRUE	.	.
chr22_18091827_18092479	chr22	18091827	18092479	14159	PEX26	PEX26	.	.	TRUE	.	.
chr22_20211945_20212446	chr22	20211945	20212446	5863	LINC00896	LINC00896	.	.	TRUE	.	.
chr22_20503679_20504180	chr22	20503679	20504180	-3613	MED15	MED15	.	.	TRUE	.	.
chr22_24952394_24952931	chr22	24952394	24952931	-5967	TMEM211	TMEM211	.	.	TRUE	.	.
chr22_24966096_24966697	chr22	24966096	24966697	-19701	TMEM211	TMEM211	.	.	TRUE	.	.
chr22_24969839_24970340	chr22	24969839	24970340	-23394	TMEM211	TMEM211	.	.	TRUE	.	.
chr22_24973823_24974324	chr22	24973823	24974324	-27378	TMEM211	TMEM211	.	.	TRUE	.	.
chr22_24977773_24978274	chr22	24977773	24978274	-31328	TMEM211	TMEM211	.	.	TRUE	.	.
chr22_24991758_24992315	chr22	24991758	24992315	-35938	KIAA1671	KIAA1671	.	.	TRUE	.	.
chr22_24994211_24994712	chr22	24994211	24994712	-33513	KIAA1671	KIAA1671	.	.	TRUE	.	.
chr22_25008681_25009182	chr22	25008681	25009182	-19043	KIAA1671	KIAA1671	.	.	TRUE	.	.
chr22_25013607_25014109	chr22	25013607	25014109	-14116	KIAA1671	KIAA1671	.	.	TRUE	.	.
chr22_25400744_25401295	chr22	25400744	25401295	-19442	LRP5L	LRP5L	.	.	TRUE	.	.
chr22_25405073_25405574	chr22	25405073	25405574	-23746	LRP5L	LRP5L	.	.	TRUE	.	.
chr22_33271419_33271920	chr22	33271419	33271920	163140	LINC01640	LINC01640	.	.	TRUE	.	.
chr22_41181735_41182236	chr22	41181735	41182236	15516	EP300-AS1	EP300-AS1	.	.	TRUE	.	.
chr22_42440030_42440531	chr22	42440030	42440531	-7885	NFAM1	NFAM1	.	.	TRUE	.	.
chr22_42444159_42444660	chr22	42444159	42444660	-12014	NFAM1	NFAM1	.	.	TRUE	.	.
chr22_46115575_46116076	chr22	46115575	46116076	2139	MIRLET7B	MIRLET7B	.	.	TRUE	.	.
chr22_46575210_46575711	chr22	46575210	46575711	-38290	CELSR1	CELSR1	.	.	TRUE	.	.
chr22_46576849_46577350	chr22	46576849	46577350	-39929	CELSR1	CELSR1	.	.	TRUE	.	.
chr22_46580327_46580828	chr22	46580327	46580828	-39825	GRAMD4	GRAMD4	.	.	TRUE	.	.
chr22_46582442_46582943	chr22	46582442	46582943	-37710	GRAMD4	GRAMD4	.	.	TRUE	.	.
chr22_46584496_46584997	chr22	46584496	46584997	-35656	GRAMD4	GRAMD4	.	.	TRUE	.	.
chr22_46587485_46588206	chr22	46587485	46588206	-32557	GRAMD4	GRAMD4	.	.	TRUE	.	.
chr22_46593306_46593807	chr22	46593306	46593807	-26846	GRAMD4	GRAMD4	.	.	TRUE	.	.
chr22_46596787_46597326	chr22	46596787	46597326	-23346	GRAMD4	GRAMD4	.	.	TRUE	.	.
chr22_46607371_46607872	chr22	46607371	46607872	-12781	GRAMD4	GRAMD4	.	.	TRUE	.	.
chr22_46609145_46609708	chr22	46609145	46609708	-10976	GRAMD4	GRAMD4	.	.	TRUE	.	.
chr22_46612739_46613240	chr22	46612739	46613240	-7413	GRAMD4	GRAMD4	.	.	TRUE	.	.
chr22_46613512_46614013	chr22	46613512	46614013	-6640	GRAMD4	GRAMD4	.	.	TRUE	.	.
chr22_46617352_46617853	chr22	46617352	46617853	-2800	GRAMD4	GRAMD4	.	.	TRUE	.	.
chr22_46742764_46743265	chr22	46742764	46743265	-4759	CERK	CERK	.	.	TRUE	.	.
chr22_49948918_49949723	chr22	49948918	49949723	-11175	PIM3	PIM3	.	.	TRUE	.	.
chr3_12439099_12439600	chr3	12439099	12439600	-45083	TSEN2	TSEN2	.	.	TRUE	.	.
chr3_12444433_12445486	chr3	12444433	12445486	-39473	TSEN2	TSEN2	.	.	TRUE	.	.
chr3_27632806_27633335	chr3	27632806	27633335	89645	EOMES	EOMES	.	.	TRUE	.	.
chr3_32077392_32077909	chr3	32077392	32077909	-28861	GPD1L	GPD1L	.	.	TRUE	.	.
chr3_37985514_37986015	chr3	37985514	37986015	-7823	VILL	VILL	.	.	TRUE	.	.
chr3_37986831_37987344	chr3	37986831	37987344	-6500	VILL	VILL	.	.	TRUE	.	.
chr3_37987663_37988164	chr3	37987663	37988164	-5674	VILL	VILL	.	.	TRUE	.	.
chr3_37990455_37990976	chr3	37990455	37990976	-2872	VILL	VILL	.	.	TRUE	.	.
chr3_37991112_37991613	chr3	37991112	37991613	-2225	VILL	VILL	.	.	TRUE	.	.
chr3_42014003_42014504	chr3	42014003	42014504	-51813	ULK4	ULK4	.	.	TRUE	.	.
chr3_46913591_46914092	chr3	46913591	46914092	31592	PTH1R	PTH1R	.	.	TRUE	.	.
chr3_49906066_49906567	chr3	49906066	49906567	-2679	MST1R	MST1R	.	.	TRUE	.	.
chr3_52298628_52299129	chr3	52298628	52299129	-4570	MIR135A1	MIR135A1	.	.	TRUE	.	.
chr3_52305903_52306404	chr3	52305903	52306404	-10166	DNAH1	DNAH1	.	.	TRUE	.	.
chr3_52307594_52308095	chr3	52307594	52308095	-8475	DNAH1	DNAH1	.	.	TRUE	.	.
chr3_58173648_58174149	chr3	58173648	58174149	-3263	FLNB-AS1	FLNB-AS1	.	.	TRUE	.	.
chr3_58175451_58175953	chr3	58175451	58175953	-5067	FLNB-AS1	FLNB-AS1	.	.	TRUE	.	.
chr3_58177634_58178137	chr3	58177634	58178137	-7250	FLNB-AS1	FLNB-AS1	.	.	TRUE	.	.
chr3_58181080_58181581	chr3	58181080	58181581	-10695	FLNB-AS1	FLNB-AS1	.	.	TRUE	.	.
chr3_67357752_67358272	chr3	67357752	67358272	132548	MIR4272	MIR4272	.	.	TRUE	.	.
chr3_75362047_75362678	chr3	75362047	75362678	72753	FAM86DP	FAM86DP	.	.	TRUE	.	.
chr3_112376935_112377436	chr3	112376935	112377436	44238	CD200	CD200	.	.	TRUE	.	.
chr3_115778926_115779427	chr3	115778926	115779427	125950	SNORD155	SNORD155	.	.	TRUE	.	.
chr3_115784142_115784671	chr3	115784142	115784671	120720	SNORD155	SNORD155	.	.	TRUE	.	.
chr3_115790687_115791402	chr3	115790687	115791402	114082	SNORD155	SNORD155	.	.	TRUE	.	.
chr3_115792454_115792955	chr3	115792454	115792955	112422	SNORD155	SNORD155	.	.	TRUE	.	.
chr3_115800165_115800666	chr3	115800165	115800666	104711	SNORD155	SNORD155	.	.	TRUE	.	.
chr3_119206547_119207048	chr3	119206547	119207048	-19689	B4GALT4-AS1	B4GALT4-AS1	.	.	TRUE	.	.
chr3_119210000_119210501	chr3	119210000	119210501	-16236	B4GALT4-AS1	B4GALT4-AS1	.	.	TRUE	.	.
chr3_125766191_125766747	chr3	125766191	125766747	-8245	LOC105374312	LOC105374312	.	.	TRUE	.	.
chr3_127915142_127915643	chr3	127915142	127915643	-7667	KBTBD12	KBTBD12	.	.	TRUE	.	.
chr3_127920696_127921197	chr3	127920696	127921197	-2113	KBTBD12	KBTBD12	.	.	TRUE	.	.
chr3_128617437_128618165	chr3	128617437	128618165	33075	RPN1	RPN1	.	.	TRUE	.	.
chr3_134325670_134326171	chr3	134325670	134326171	12344	LINC02004	LINC02004	.	.	TRUE	.	.
chr3_138034868_138035369	chr3	138034868	138035369	24954	CLDN18	CLDN18	.	.	TRUE	.	.
chr3_138038674_138039175	chr3	138038674	138039175	28760	CLDN18	CLDN18	.	.	TRUE	.	.
chr3_138915379_138916261	chr3	138915379	138916261	28200	LINC01391	LINC01391	.	.	TRUE	.	.
chr3_151460686_151461209	chr3	151460686	151461209	-2238	IGSF10	IGSF10	.	.	TRUE	.	.
chr3_155469141_155469642	chr3	155469141	155469642	-16412	PLCH1-AS2	PLCH1-AS2	.	.	TRUE	.	.
chr3_186752852_186753474	chr3	186752852	186753474	-30409	EIF4A2	EIF4A2	.	.	TRUE	.	.
chr3_186760462_186761098	chr3	186760462	186761098	-22792	EIF4A2	EIF4A2	.	.	TRUE	.	.
chr3_186772783_186773284	chr3	186772783	186773284	-10539	EIF4A2	EIF4A2	.	.	TRUE	.	.
chr3_193826240_193826785	chr3	193826240	193826785	17497	LINC02038	LINC02038	.	.	TRUE	.	.
chr3_193828401_193828902	chr3	193828401	193828902	15358	LINC02038	LINC02038	.	.	TRUE	.	.
chr3_193829638_193830139	chr3	193829638	193830139	14121	LINC02038	LINC02038	.	.	TRUE	.	.
chr3_193831397_193831936	chr3	193831397	193831936	12343	LINC02038	LINC02038	.	.	TRUE	.	.
chr3_193832051_193832552	chr3	193832051	193832552	11708	LINC02038	LINC02038	.	.	TRUE	.	.
chr3_193834492_193835118	chr3	193834492	193835118	9204	LINC02038	LINC02038	.	.	TRUE	.	.
chr3_193869508_193870139	chr3	193869508	193870139	-25814	LINC02038	LINC02038	.	.	TRUE	.	.
chr3_193870248_193870749	chr3	193870248	193870749	-26489	LINC02038	LINC02038	.	.	TRUE	.	.
chr3_197598964_197599703	chr3	197598964	197599703	-26010	BDH1	BDH1	.	.	TRUE	.	.
chr3_197654049_197654550	chr3	197654049	197654550	20277	MIR922	MIR922	.	.	TRUE	.	.
chr4_1862648_1863149	chr4	1862648	1863149	-6651	LETM1	LETM1	.	.	TRUE	.	.
chr4_3041625_3042126	chr4	3041625	3042126	32639	HTT-AS	HTT-AS	.	.	TRUE	.	.
chr4_6681094_6681595	chr4	6681094	6681595	7250	LOC93622	LOC93622	.	.	TRUE	.	.
chr4_9000444_9001013	chr4	9000444	9001013	-128911	HMX1	HMX1	.	.	TRUE	.	.
chr4_9078664_9079165	chr4	9078664	9079165	-94259	FAM90A26	FAM90A26	.	.	TRUE	.	.
chr4_9532073_9532720	chr4	9532073	9532720	23920	MIR548I2	MIR548I2	.	.	TRUE	.	.
chr4_9539974_9540475	chr4	9539974	9540475	16092	MIR548I2	MIR548I2	.	.	TRUE	.	.
chr4_9541505_9542006	chr4	9541505	9542006	14561	MIR548I2	MIR548I2	.	.	TRUE	.	.
chr4_9549430_9549931	chr4	9549430	9549931	6636	MIR548I2	MIR548I2	.	.	TRUE	.	.
chr4_9577786_9578287	chr4	9577786	9578287	-21720	MIR548I2	MIR548I2	.	.	TRUE	.	.
chr4_10063639_10064140	chr4	10063639	10064140	14803	MIR3138	MIR3138	.	.	TRUE	.	.
chr4_10983213_10983714	chr4	10983213	10983714	-298598	CLNK	CLNK	.	.	TRUE	.	.
chr4_11066388_11066889	chr4	11066388	11066889	-302189	MIR572	MIR572	.	.	TRUE	.	.
chr4_11782804_11783628	chr4	11782804	11783628	-13748	LINC02360	LINC02360	.	.	TRUE	.	.
chr4_23768456_23768957	chr4	23768456	23768957	112586	PPARGC1A	PPARGC1A	.	.	TRUE	.	.
chr4_26780612_26781113	chr4	26780612	26781113	79382	LOC105374546	LOC105374546	.	.	TRUE	.	.
chr4_26787806_26788316	chr4	26787806	26788316	72183	LOC105374546	LOC105374546	.	.	TRUE	.	.
chr4_26857446_26857956	chr4	26857446	26857956	2543	LOC105374546	LOC105374546	.	.	TRUE	.	.
chr4_38702369_38702870	chr4	38702369	38702870	-37991	KLF3-AS1	KLF3-AS1	.	.	TRUE	.	.
chr4_40419410_40419911	chr4	40419410	40419911	82459	MIR4802	MIR4802	.	.	TRUE	.	.
chr4_69718868_69719369	chr4	69718868	69719369	41594	SULT1B1	SULT1B1	.	.	TRUE	.	.
chr4_71602477_71603003	chr4	71602477	71603003	181622	GC	GC	.	.	TRUE	.	.
chr4_71606448_71606949	chr4	71606448	71606949	177664	GC	GC	.	.	TRUE	.	.
chr4_71608222_71608766	chr4	71608222	71608766	175868	GC	GC	.	.	TRUE	.	.
chr4_71609627_71610128	chr4	71609627	71610128	174485	GC	GC	.	.	TRUE	.	.
chr4_71614585_71615134	chr4	71614585	71615134	169503	GC	GC	.	.	TRUE	.	.
chr4_71630723_71631224	chr4	71630723	71631224	153389	GC	GC	.	.	TRUE	.	.
chr4_71634336_71634837	chr4	71634336	71634837	149776	GC	GC	.	.	TRUE	.	.
chr4_75180165_75180666	chr4	75180165	75180666	-95707	LINC02562	LINC02562	.	.	TRUE	.	.
chr4_75180926_75181427	chr4	75180926	75181427	-96468	LINC02562	LINC02562	.	.	TRUE	.	.
chr4_83082752_83083253	chr4	83082752	83083253	26857	PLAC8	PLAC8	.	.	TRUE	.	.
chr4_83084007_83084508	chr4	83084007	83084508	25602	PLAC8	PLAC8	.	.	TRUE	.	.
chr4_94670247_94670748	chr4	94670247	94670748	87036	BMPR1B-DT	BMPR1B-DT	.	.	TRUE	.	.
chr4_105860383_105860884	chr4	105860383	105860884	-33461	LOC101929529	LOC101929529	.	.	TRUE	.	.
chr4_118265332_118266135	chr4	118265332	118266135	-13029	SNHG8	SNHG8	.	.	TRUE	.	.
chr4_119314286_119314813	chr4	119314286	119314813	7612	FABP2	FABP2	.	.	TRUE	.	.
chr4_123545971_123546499	chr4	123545971	123546499	-103756	LINC01091	LINC01091	.	.	TRUE	.	.
chr4_141307102_141307608	chr4	141307102	141307608	25262	LINC02432	LINC02432	.	.	TRUE	.	.
chr4_151316587_151317088	chr4	151316587	151317088	39664	PRSS48	PRSS48	.	.	TRUE	.	.
chr4_151324951_151325950	chr4	151324951	151325950	48277	PRSS48	PRSS48	.	.	TRUE	.	.
chr4_152917498_152917999	chr4	152917498	152917999	19089	LOC729870	LOC729870	.	.	TRUE	.	.
chr4_153341745_153342246	chr4	153341745	153342246	-2654	MND1	MND1	.	.	TRUE	.	.
chr4_170305618_170306336	chr4	170305618	170306336	79386	LINC01612	LINC01612	.	.	TRUE	.	.
chr4_184385633_184386553	chr4	184385633	184386553	-3787	LINC02362	LINC02362	.	.	TRUE	.	.
chr4_186104416_186105214	chr4	186104416	186105214	35660	TLR3	TLR3	.	.	TRUE	.	.
chr4_186586149_186586650	chr4	186586149	186586650	-30832	MTNR1A	MTNR1A	.	.	TRUE	.	.
chr4_186725759_186726260	chr4	186725759	186726260	-2176	FAT1	FAT1	.	.	TRUE	.	.
chr4_186726458_186726959	chr4	186726458	186726959	-2875	FAT1	FAT1	.	.	TRUE	.	.
chr5_10267220_10267721	chr5	10267220	10267721	16933	CCT5	CCT5	.	.	TRUE	.	.
chr5_39447937_39448720	chr5	39447937	39448720	-23095	DAB2	DAB2	.	.	TRUE	.	.
chr5_61290668_61291169	chr5	61290668	61291169	-25989	LINC02057	LINC02057	.	.	TRUE	.	.
chr5_61292950_61293451	chr5	61292950	61293451	-28271	LINC02057	LINC02057	.	.	TRUE	.	.
chr5_61301710_61302231	chr5	61301710	61302231	-30303	ZSWIM6	ZSWIM6	.	.	TRUE	.	.
chr5_75037020_75037521	chr5	75037020	75037521	-6371	GCNT4	GCNT4	.	.	TRUE	.	.
chr5_76838588_76839089	chr5	76838588	76839089	-11163	S100Z	S100Z	.	.	TRUE	.	.
chr5_78720465_78720966	chr5	78720465	78720966	-71890	LHFPL2	LHFPL2	.	.	TRUE	.	.
chr5_103544331_103544981	chr5	103544331	103544981	-2671	LINC02115	LINC02115	.	.	TRUE	.	.
chr5_103624726_103625227	chr5	103624726	103625227	-62175	NUDT12	NUDT12	.	.	TRUE	.	.
chr5_107673494_107674066	chr5	107673494	107674066	-2885	EFNA5	EFNA5	.	.	TRUE	.	.
chr5_115389770_115390271	chr5	115389770	115390271	-93259	CCDC112	CCDC112	.	.	TRUE	.	.
chr5_124634748_124635249	chr5	124634748	124635249	110114	ZNF608	ZNF608	.	.	TRUE	.	.
chr5_128201254_128201779	chr5	128201254	128201779	117725	SLC12A2	SLC12A2	.	.	TRUE	.	.
chr5_138937815_138938316	chr5	138937815	138938316	62665	CTNNA1	CTNNA1	.	.	TRUE	.	.
chr5_141849561_141850221	chr5	141849561	141850221	16311	PCDH1	PCDH1	.	.	TRUE	.	.
chr5_146073449_146073950	chr5	146073449	146073950	31866	PLAC8L1	PLAC8L1	.	.	TRUE	.	.
chr5_146076055_146076556	chr5	146076055	146076556	29260	PLAC8L1	PLAC8L1	.	.	TRUE	.	.
chr5_149485494_149486513	chr5	149485494	149486513	55357	MIR145	MIR145	.	.	TRUE	.	.
chr5_150585664_150586257	chr5	150585664	150586257	-15120	SYNPO	SYNPO	.	.	TRUE	.	.
chr5_160893145_160893691	chr5	160893145	160893691	-41206	ATP10B	ATP10B	.	.	TRUE	.	.
chr5_172766268_172766769	chr5	172766268	172766769	4682	DUSP1	DUSP1	.	.	TRUE	.	.
chr5_181027910_181028411	chr5	181027910	181028411	-12065	BTNL9	BTNL9	.	.	TRUE	.	.
chr6_6724498_6724999	chr6	6724498	6724999	-101922	LY86-AS1	LY86-AS1	.	.	TRUE	.	.
chr6_8157798_8158309	chr6	8157798	8158309	-55458	EEF1E1	EEF1E1	.	.	TRUE	.	.
chr6_26257174_26257675	chr6	26257174	26257675	5773	HIST1H2BH	HIST1H2BH	.	.	TRUE	.	.
chr6_34719025_34719526	chr6	34719025	34719526	22330	LOC101929243	LOC101929243	.	.	TRUE	.	.
chr6_39143172_39143673	chr6	39143172	39143673	-28236	SAYSD1	SAYSD1	.	.	TRUE	.	.
chr6_39166364_39166865	chr6	39166364	39166865	-51428	SAYSD1	SAYSD1	.	.	TRUE	.	.
chr6_39166891_39167392	chr6	39166891	39167392	-51955	SAYSD1	SAYSD1	.	.	TRUE	.	.
chr6_39169612_39170113	chr6	39169612	39170113	-54676	SAYSD1	SAYSD1	.	.	TRUE	.	.
chr6_39178728_39179229	chr6	39178728	39179229	50497	KCNK5	KCNK5	.	.	TRUE	.	.
chr6_39184959_39185460	chr6	39184959	39185460	44266	KCNK5	KCNK5	.	.	TRUE	.	.
chr6_39187450_39187951	chr6	39187450	39187951	41775	KCNK5	KCNK5	.	.	TRUE	.	.
chr6_42454352_42454890	chr6	42454352	42454890	-2570	TRERF1	TRERF1	.	.	TRUE	.	.
chr6_52416468_52416969	chr6	52416468	52416969	-3478	EFHC1	EFHC1	.	.	TRUE	.	.
chr6_52881991_52882784	chr6	52881991	52882784	27311	GSTA3	GSTA3	.	.	TRUE	.	.
chr6_73514052_73514553	chr6	73514052	73514553	4136	SNORD141A	SNORD141A	.	.	TRUE	.	.
chr6_79710099_79710600	chr6	79710099	79710600	79244	SH3BGRL2	SH3BGRL2	.	.	TRUE	.	.
chr6_83976313_83977240	chr6	83976313	83977240	-56883	MRAP2	MRAP2	.	.	TRUE	.	.
chr6_84093348_84093869	chr6	84093348	84093869	59489	MRAP2	MRAP2	.	.	TRUE	.	.
chr6_106967751_106968252	chr6	106967751	106968252	6038	CD24	CD24	.	.	TRUE	.	.
chr6_131954664_131955165	chr6	131954664	131955165	-3536	CTGF	CTGF	.	.	TRUE	.	.
chr6_142452535_142453036	chr6	142452535	142453036	150866	ADGRG6	ADGRG6	.	.	TRUE	.	.
chr6_142456914_142457415	chr6	142456914	142457415	155245	ADGRG6	ADGRG6	.	.	TRUE	.	.
chr6_143537177_143537678	chr6	143537177	143537678	24624	PHACTR2-AS1	PHACTR2-AS1	.	.	TRUE	.	.
chr6_143549530_143550031	chr6	143549530	143550031	12271	PHACTR2-AS1	PHACTR2-AS1	.	.	TRUE	.	.
chr6_143573927_143574428	chr6	143573927	143574428	-4838	PHACTR2-AS1	PHACTR2-AS1	.	.	TRUE	.	.
[truncated: 2,603 more rows]
