# Supplementary material for: eRNA profiling uncovers the enhancer landscape of oesophageal adenocarcinoma and reveals new deregulated pathways
Source: eLife. 2023 Feb 20;12:e80840. doi: 10.7554/eLife.80840 (PMC9998086; doi:10.7554/eLife.80840)
Supplement: Supplementary file 4. [file elife-80840-supp4.xlsx]

## Sheet: Legend
Table S4
Kas-seq peaks in OE19 cells.
(A) All KAS-seq peaks identified using macs2 --broadpeak
(B) Intergenic peaks were filtered to retain only intergenic regions ≥2 kb upstream from a TSS or ≥500 bp downstream from a TTS

## Sheet: (A) All peaks
PeakID	Chr	Start	End
chr1_633784_634286	chr1	633784	634286
chr1_943008_943510	chr1	943008	943510
chr1_995519_996021	chr1	995519	996021
chr1_1029474_1029976	chr1	1029474	1029976
chr1_1069730_1070232	chr1	1069730	1070232
chr1_1073935_1074437	chr1	1073935	1074437
chr1_1079743_1080245	chr1	1079743	1080245
chr1_1081420_1081922	chr1	1081420	1081922
chr1_1123602_1124104	chr1	1123602	1124104
chr1_1144708_1145210	chr1	1144708	1145210
chr1_1156880_1157382	chr1	1156880	1157382
chr1_1157984_1158486	chr1	1157984	1158486
chr1_1160189_1160691	chr1	1160189	1160691
chr1_1161450_1161952	chr1	1161450	1161952
chr1_1162741_1163243	chr1	1162741	1163243
chr1_1165008_1165510	chr1	1165008	1165510
chr1_1166134_1166636	chr1	1166134	1166636
chr1_1167294_1167796	chr1	1167294	1167796
chr1_1170073_1170575	chr1	1170073	1170575
chr1_1173125_1173627	chr1	1173125	1173627
chr1_1173838_1174340	chr1	1173838	1174340
chr1_1237341_1237843	chr1	1237341	1237843
chr1_1258937_1259439	chr1	1258937	1259439
chr1_1291117_1291619	chr1	1291117	1291619
chr1_1296581_1297083	chr1	1296581	1297083
chr1_1305428_1305930	chr1	1305428	1305930
chr1_1309418_1309920	chr1	1309418	1309920
chr1_1310519_1311021	chr1	1310519	1311021
chr1_1311525_1312027	chr1	1311525	1312027
chr1_1313995_1314497	chr1	1313995	1314497
chr1_1318874_1319376	chr1	1318874	1319376
chr1_1329014_1329516	chr1	1329014	1329516
chr1_1331203_1331705	chr1	1331203	1331705
chr1_1332456_1332958	chr1	1332456	1332958
chr1_1340869_1341371	chr1	1340869	1341371
chr1_1354396_1354898	chr1	1354396	1354898
chr1_1370810_1371312	chr1	1370810	1371312
chr1_1399587_1400089	chr1	1399587	1400089
chr1_1400722_1401224	chr1	1400722	1401224
chr1_1407113_1407615	chr1	1407113	1407615
chr1_1535648_1536150	chr1	1535648	1536150
chr1_1536271_1536773	chr1	1536271	1536773
chr1_1550796_1551298	chr1	1550796	1551298
chr1_1551743_1552245	chr1	1551743	1552245
chr1_1554484_1554986	chr1	1554484	1554986
chr1_1615473_1615975	chr1	1615473	1615975
chr1_1627810_1628312	chr1	1627810	1628312
chr1_1628606_1629108	chr1	1628606	1629108
chr1_1630773_1631275	chr1	1630773	1631275
chr1_1754072_1754574	chr1	1754072	1754574
chr1_1778862_1779364	chr1	1778862	1779364
chr1_1782108_1782610	chr1	1782108	1782610
chr1_2187538_2188040	chr1	2187538	2188040
chr1_2189558_2190060	chr1	2189558	2190060
chr1_2376967_2377469	chr1	2376967	2377469
chr1_2383643_2384145	chr1	2383643	2384145
chr1_2384793_2385295	chr1	2384793	2385295
chr1_2406423_2406925	chr1	2406423	2406925
chr1_2416286_2416788	chr1	2416286	2416788
chr1_2417490_2417992	chr1	2417490	2417992
chr1_2418526_2419028	chr1	2418526	2419028
chr1_3310645_3311147	chr1	3310645	3311147
chr1_3312709_3313211	chr1	3312709	3313211
chr1_3470363_3470865	chr1	3470363	3470865
chr1_3481874_3482376	chr1	3481874	3482376
chr1_3482474_3482976	chr1	3482474	3482976
chr1_3483385_3483887	chr1	3483385	3483887
chr1_3484848_3485350	chr1	3484848	3485350
chr1_3489292_3489794	chr1	3489292	3489794
chr1_3490023_3490525	chr1	3490023	3490525
chr1_3491846_3492348	chr1	3491846	3492348
chr1_6183023_6183525	chr1	6183023	6183525
chr1_6183600_6184102	chr1	6183600	6184102
chr1_6586297_6586799	chr1	6586297	6586799
chr1_6587247_6587749	chr1	6587247	6587749
chr1_6587956_6588458	chr1	6587956	6588458
chr1_6602575_6603077	chr1	6602575	6603077
chr1_7961329_7961831	chr1	7961329	7961831
chr1_8026008_8026510	chr1	8026008	8026510
chr1_8856811_8857313	chr1	8856811	8857313
chr1_8862545_8863047	chr1	8862545	8863047
chr1_8878500_8879002	chr1	8878500	8879002
chr1_9617649_9618151	chr1	9617649	9618151
chr1_9724799_9725301	chr1	9724799	9725301
chr1_10450092_10450594	chr1	10450092	10450594
chr1_11051955_11052457	chr1	11051955	11052457
chr1_11052812_11053314	chr1	11052812	11053314
chr1_11053382_11053884	chr1	11053382	11053884
chr1_11060098_11060600	chr1	11060098	11060600
chr1_11273386_11273888	chr1	11273386	11273888
chr1_11908777_11909279	chr1	11908777	11909279
chr1_15153235_15153737	chr1	15153235	15153737
chr1_15435203_15435705	chr1	15435203	15435705
chr1_15847215_15847717	chr1	15847215	15847717
chr1_15935440_15935942	chr1	15935440	15935942
chr1_16120454_16120956	chr1	16120454	16120956
chr1_16122446_16122948	chr1	16122446	16122948
chr1_16144031_16144533	chr1	16144031	16144533
chr1_16206566_16207068	chr1	16206566	16207068
chr1_16367437_16367939	chr1	16367437	16367939
chr1_16440536_16441038	chr1	16440536	16441038
chr1_16513553_16514055	chr1	16513553	16514055
chr1_16535076_16535578	chr1	16535076	16535578
chr1_16545717_16546219	chr1	16545717	16546219
chr1_16678008_16678510	chr1	16678008	16678510
chr1_16727156_16727658	chr1	16727156	16727658
chr1_16872378_16872880	chr1	16872378	16872880
chr1_16896294_16896796	chr1	16896294	16896796
chr1_16904753_16905255	chr1	16904753	16905255
chr1_18902812_18903314	chr1	18902812	18903314
chr1_19210204_19210706	chr1	19210204	19210706
chr1_19262729_19263231	chr1	19262729	19263231
chr1_19332739_19333241	chr1	19332739	19333241
chr1_19485712_19486214	chr1	19485712	19486214
chr1_19678682_19679184	chr1	19678682	19679184
chr1_19978657_19979159	chr1	19978657	19979159
chr1_20480348_20480850	chr1	20480348	20480850
chr1_20481401_20481903	chr1	20481401	20481903
chr1_20483623_20484125	chr1	20483623	20484125
chr1_20484645_20485147	chr1	20484645	20485147
chr1_20486776_20487278	chr1	20486776	20487278
chr1_20507865_20508367	chr1	20507865	20508367
chr1_20732539_20733041	chr1	20732539	20733041
chr1_20787358_20787860	chr1	20787358	20787860
chr1_21591711_21592213	chr1	21591711	21592213
chr1_21592647_21593149	chr1	21592647	21593149
chr1_21593306_21593808	chr1	21593306	21593808
chr1_21594376_21594878	chr1	21594376	21594878
chr1_21596342_21596844	chr1	21596342	21596844
chr1_21597765_21598267	chr1	21597765	21598267
chr1_21598346_21598848	chr1	21598346	21598848
chr1_21599374_21599876	chr1	21599374	21599876
chr1_21601941_21602443	chr1	21601941	21602443
chr1_21605184_21605686	chr1	21605184	21605686
chr1_21606061_21606563	chr1	21606061	21606563
chr1_21606900_21607402	chr1	21606900	21607402
chr1_21607895_21608397	chr1	21607895	21608397
chr1_21613222_21613724	chr1	21613222	21613724
chr1_21638862_21639364	chr1	21638862	21639364
chr1_21651247_21651749	chr1	21651247	21651749
chr1_21783060_21783562	chr1	21783060	21783562
chr1_22025411_22025913	chr1	22025411	22025913
chr1_22052532_22053034	chr1	22052532	22053034
chr1_23691705_23692207	chr1	23691705	23692207
chr1_23790864_23791366	chr1	23790864	23791366
chr1_23793819_23794321	chr1	23793819	23794321
chr1_23796103_23796605	chr1	23796103	23796605
chr1_23797613_23798115	chr1	23797613	23798115
chr1_23799564_23800066	chr1	23799564	23800066
chr1_23800521_23801023	chr1	23800521	23801023
chr1_23959099_23959601	chr1	23959099	23959601
chr1_23959716_23960218	chr1	23959716	23960218
chr1_23980035_23980537	chr1	23980035	23980537
chr1_25239702_25240204	chr1	25239702	25240204
chr1_25247212_25247714	chr1	25247212	25247714
chr1_25430099_25430601	chr1	25430099	25430601
chr1_25906132_25906634	chr1	25906132	25906634
chr1_26111776_26112278	chr1	26111776	26112278
chr1_26279453_26279955	chr1	26279453	26279955
chr1_26280247_26280749	chr1	26280247	26280749
chr1_26282401_26282903	chr1	26282401	26282903
chr1_26371402_26371904	chr1	26371402	26371904
chr1_26471865_26472367	chr1	26471865	26472367
chr1_26479561_26480063	chr1	26479561	26480063
chr1_26500771_26501273	chr1	26500771	26501273
chr1_26695536_26696038	chr1	26695536	26696038
chr1_26697394_26697896	chr1	26697394	26697896
chr1_26787942_26788444	chr1	26787942	26788444
chr1_26862946_26863448	chr1	26862946	26863448
chr1_26864675_26865177	chr1	26864675	26865177
chr1_26889652_26890154	chr1	26889652	26890154
chr1_26921586_26922088	chr1	26921586	26922088
chr1_26950410_26950912	chr1	26950410	26950912
chr1_26993500_26994002	chr1	26993500	26994002
chr1_26995950_26996452	chr1	26995950	26996452
chr1_26997784_26998286	chr1	26997784	26998286
chr1_26998744_26999246	chr1	26998744	26999246
chr1_27000797_27001299	chr1	27000797	27001299
chr1_27002242_27002744	chr1	27002242	27002744
chr1_27005054_27005556	chr1	27005054	27005556
chr1_27012519_27013021	chr1	27012519	27013021
chr1_27100427_27100929	chr1	27100427	27100929
chr1_27154796_27155298	chr1	27154796	27155298
chr1_27349450_27349952	chr1	27349450	27349952
chr1_27350705_27351207	chr1	27350705	27351207
chr1_27400447_27400949	chr1	27400447	27400949
chr1_27528154_27528656	chr1	27528154	27528656
chr1_28506215_28506717	chr1	28506215	28506717
chr1_28506800_28507302	chr1	28506800	28507302
chr1_28507444_28507946	chr1	28507444	28507946
chr1_28508400_28508902	chr1	28508400	28508902
chr1_28510054_28510556	chr1	28510054	28510556
chr1_28511350_28511852	chr1	28511350	28511852
chr1_28515462_28515964	chr1	28515462	28515964
chr1_28576795_28577297	chr1	28576795	28577297
chr1_28581491_28581993	chr1	28581491	28581993
chr1_28642737_28643239	chr1	28642737	28643239
chr1_28648685_28649187	chr1	28648685	28649187
chr1_28669100_28669602	chr1	28669100	28669602
chr1_28775240_28775742	chr1	28775240	28775742
chr1_30929106_30929608	chr1	30929106	30929608
chr1_31154840_31155342	chr1	31154840	31155342
chr1_31576351_31576853	chr1	31576351	31576853
chr1_31588125_31588627	chr1	31588125	31588627
chr1_32179438_32179940	chr1	32179438	32179940
chr1_32198749_32199251	chr1	32198749	32199251
chr1_32334682_32335184	chr1	32334682	32335184
chr1_32771656_32772158	chr1	32771656	32772158
chr1_32772446_32772948	chr1	32772446	32772948
chr1_32773473_32773975	chr1	32773473	32773975
chr1_32774124_32774626	chr1	32774124	32774626
chr1_32893040_32893542	chr1	32893040	32893542
chr1_33350024_33350526	chr1	33350024	33350526
chr1_34859413_34859915	chr1	34859413	34859915
chr1_35172727_35173229	chr1	35172727	35173229
chr1_35192850_35193352	chr1	35192850	35193352
chr1_35557033_35557535	chr1	35557033	35557535
chr1_35641289_35641791	chr1	35641289	35641791
chr1_35769663_35770165	chr1	35769663	35770165
chr1_35930584_35931086	chr1	35930584	35931086
chr1_36155570_36156072	chr1	36155570	36156072
chr1_36306199_36306701	chr1	36306199	36306701
chr1_36306929_36307431	chr1	36306929	36307431
chr1_36321571_36322073	chr1	36321571	36322073
chr1_36322718_36323220	chr1	36322718	36323220
chr1_37474542_37475044	chr1	37474542	37475044
chr1_37595591_37596093	chr1	37595591	37596093
chr1_37807805_37808307	chr1	37807805	37808307
chr1_37859385_37859887	chr1	37859385	37859887
chr1_40040008_40040510	chr1	40040008	40040510
chr1_40691599_40692101	chr1	40691599	40692101
chr1_41020250_41020752	chr1	41020250	41020752
chr1_41020763_41021265	chr1	41020763	41021265
chr1_41021341_41021843	chr1	41021341	41021843
chr1_41022236_41022738	chr1	41022236	41022738
chr1_41023667_41024169	chr1	41023667	41024169
chr1_42682058_42682560	chr1	42682058	42682560
chr1_42682774_42683276	chr1	42682774	42683276
chr1_42958560_42959062	chr1	42958560	42959062
chr1_43358798_43359300	chr1	43358798	43359300
chr1_43360677_43361179	chr1	43360677	43361179
chr1_43363650_43364152	chr1	43363650	43364152
chr1_43446973_43447475	chr1	43446973	43447475
chr1_43453226_43453728	chr1	43453226	43453728
chr1_43453790_43454292	chr1	43453790	43454292
chr1_43650337_43650839	chr1	43650337	43650839
chr1_43706971_43707473	chr1	43706971	43707473
chr1_43974476_43974978	chr1	43974476	43974978
chr1_43991545_43992047	chr1	43991545	43992047
chr1_44030951_44031453	chr1	44030951	44031453
chr1_44721453_44721955	chr1	44721453	44721955
chr1_44730695_44731197	chr1	44730695	44731197
chr1_44775437_44775939	chr1	44775437	44775939
chr1_45326648_45327150	chr1	45326648	45327150
chr1_45507997_45508499	chr1	45507997	45508499
chr1_45521425_45521927	chr1	45521425	45521927
chr1_45583854_45584356	chr1	45583854	45584356
chr1_45621675_45622177	chr1	45621675	45622177
chr1_45750289_45750791	chr1	45750289	45750791
chr1_46193069_46193571	chr1	46193069	46193571
chr1_46301626_46302128	chr1	46301626	46302128
chr1_47388555_47389057	chr1	47388555	47389057
chr1_51878396_51878898	chr1	51878396	51878898
chr1_52033321_52033823	chr1	52033321	52033823
chr1_53220264_53220766	chr1	53220264	53220766
chr1_53326169_53326671	chr1	53326169	53326671
chr1_53326718_53327220	chr1	53326718	53327220
chr1_53838003_53838505	chr1	53838003	53838505
chr1_54200010_54200512	chr1	54200010	54200512
chr1_54221763_54222265	chr1	54221763	54222265
chr1_54223082_54223584	chr1	54223082	54223584
chr1_58576726_58577228	chr1	58576726	58577228
chr1_58783690_58784192	chr1	58783690	58784192
chr1_61057643_61058145	chr1	61057643	61058145
chr1_61724868_61725370	chr1	61724868	61725370
chr1_61742277_61742779	chr1	61742277	61742779
chr1_67430109_67430611	chr1	67430109	67430611
chr1_67685017_67685519	chr1	67685017	67685519
chr1_67685917_67686419	chr1	67685917	67686419
chr1_71054363_71054865	chr1	71054363	71054865
chr1_75724445_75724947	chr1	75724445	75724947
chr1_75786016_75786518	chr1	75786016	75786518
chr1_75796612_75797114	chr1	75796612	75797114
chr1_75797284_75797786	chr1	75797284	75797786
chr1_85581061_85581563	chr1	85581061	85581563
chr1_88684101_88684603	chr1	88684101	88684603
chr1_88891264_88891766	chr1	88891264	88891766
chr1_88992230_88992732	chr1	88992230	88992732
chr1_89524517_89525019	chr1	89524517	89525019
chr1_89994944_89995446	chr1	89994944	89995446
chr1_92831880_92832382	chr1	92831880	92832382
chr1_93578917_93579419	chr1	93578917	93579419
chr1_93847306_93847808	chr1	93847306	93847808
chr1_93878982_93879484	chr1	93878982	93879484
chr1_94237505_94238007	chr1	94237505	94238007
chr1_94531453_94531955	chr1	94531453	94531955
chr1_94532644_94533146	chr1	94532644	94533146
chr1_94535809_94536311	chr1	94535809	94536311
chr1_94541161_94541663	chr1	94541161	94541663
chr1_94623090_94623592	chr1	94623090	94623592
chr1_100037853_100038355	chr1	100037853	100038355
chr1_100895647_100896149	chr1	100895647	100896149
chr1_108746514_108747016	chr1	108746514	108747016
chr1_109099993_109100495	chr1	109099993	109100495
chr1_109397904_109398406	chr1	109397904	109398406
chr1_109751221_109751723	chr1	109751221	109751723
chr1_109758534_109759036	chr1	109758534	109759036
chr1_110407378_110407880	chr1	110407378	110407880
chr1_110963654_110964156	chr1	110963654	110964156
chr1_111619615_111620117	chr1	111619615	111620117
chr1_112674294_112674796	chr1	112674294	112674796
chr1_114716426_114716928	chr1	114716426	114716928
chr1_114757670_114758172	chr1	114757670	114758172
chr1_115671582_115672084	chr1	115671582	115672084
chr1_117605870_117606372	chr1	117605870	117606372
chr1_120844111_120844613	chr1	120844111	120844613
chr1_120850599_120851101	chr1	120850599	120851101
chr1_121016611_121017113	chr1	121016611	121017113
chr1_143720356_143720858	chr1	143720356	143720858
chr1_143728720_143729222	chr1	143728720	143729222
chr1_143729312_143729814	chr1	143729312	143729814
chr1_143735714_143736216	chr1	143735714	143736216
chr1_144412509_144413011	chr1	144412509	144413011
chr1_144418993_144419495	chr1	144418993	144419495
chr1_145280970_145281472	chr1	145280970	145281472
chr1_145287540_145288042	chr1	145287540	145288042
chr1_145465402_145465904	chr1	145465402	145465904
chr1_145607871_145608373	chr1	145607871	145608373
chr1_145845804_145846306	chr1	145845804	145846306
chr1_145927250_145927752	chr1	145927250	145927752
chr1_146035480_146035982	chr1	146035480	146035982
chr1_146037007_146037509	chr1	146037007	146037509
chr1_146037756_146038258	chr1	146037756	146038258
chr1_146039075_146039577	chr1	146039075	146039577
chr1_146051141_146051643	chr1	146051141	146051643
chr1_146051751_146052253	chr1	146051751	146052253
chr1_146376821_146377323	chr1	146376821	146377323
chr1_146387272_146387774	chr1	146387272	146387774
chr1_146409694_146410196	chr1	146409694	146410196
chr1_147084500_147085002	chr1	147084500	147085002
chr1_147242509_147243011	chr1	147242509	147243011
chr1_147670435_147670937	chr1	147670435	147670937
chr1_147928303_147928805	chr1	147928303	147928805
chr1_148038536_148039038	chr1	148038536	148039038
chr1_148263397_148263899	chr1	148263397	148263899
chr1_148264848_148265350	chr1	148264848	148265350
chr1_148302554_148303056	chr1	148302554	148303056
chr1_148303269_148303771	chr1	148303269	148303771
chr1_148334315_148334817	chr1	148334315	148334817
chr1_148353411_148353913	chr1	148353411	148353913
chr1_148362175_148362677	chr1	148362175	148362677
chr1_148388365_148388867	chr1	148388365	148388867
chr1_148402384_148402886	chr1	148402384	148402886
chr1_148522468_148522970	chr1	148522468	148522970
chr1_148529050_148529552	chr1	148529050	148529552
chr1_149558173_149558675	chr1	149558173	149558675
chr1_149636518_149637020	chr1	149636518	149637020
chr1_149708458_149708960	chr1	149708458	149708960
chr1_149712370_149712872	chr1	149712370	149712872
chr1_149811919_149812421	chr1	149811919	149812421
chr1_149813184_149813686	chr1	149813184	149813686
chr1_149886552_149887054	chr1	149886552	149887054
chr1_149899415_149899917	chr1	149899415	149899917
chr1_149927585_149928087	chr1	149927585	149928087
chr1_150235733_150236235	chr1	150235733	150236235
chr1_150478934_150479436	chr1	150478934	150479436
chr1_150515590_150516092	chr1	150515590	150516092
chr1_150531953_150532455	chr1	150531953	150532455
chr1_150568841_150569343	chr1	150568841	150569343
chr1_150569835_150570337	chr1	150569835	150570337
chr1_150571840_150572342	chr1	150571840	150572342
chr1_150573604_150574106	chr1	150573604	150574106
chr1_150578685_150579187	chr1	150578685	150579187
chr1_150629161_150629663	chr1	150629161	150629663
chr1_151048293_151048795	chr1	151048293	151048795
chr1_151049373_151049875	chr1	151049373	151049875
chr1_151254581_151255083	chr1	151254581	151255083
chr1_151281826_151282328	chr1	151281826	151282328
chr1_151289419_151289921	chr1	151289419	151289921
chr1_151290706_151291208	chr1	151290706	151291208
chr1_151292990_151293492	chr1	151292990	151293492
chr1_151512887_151513389	chr1	151512887	151513389
chr1_151540044_151540546	chr1	151540044	151540546
chr1_151839575_151840077	chr1	151839575	151840077
chr1_151909352_151909854	chr1	151909352	151909854
chr1_151979471_151979973	chr1	151979471	151979973
chr1_151989009_151989511	chr1	151989009	151989511
chr1_151992749_151993251	chr1	151992749	151993251
chr1_152029009_152029511	chr1	152029009	152029511
chr1_152036652_152037154	chr1	152036652	152037154
chr1_153533282_153533784	chr1	153533282	153533784
chr1_153535383_153535885	chr1	153535383	153535885
chr1_153549955_153550457	chr1	153549955	153550457
chr1_153553083_153553585	chr1	153553083	153553585
chr1_153560472_153560974	chr1	153560472	153560974
chr1_153608539_153609041	chr1	153608539	153609041
chr1_153610565_153611067	chr1	153610565	153611067
chr1_153612711_153613213	chr1	153612711	153613213
chr1_153615424_153615926	chr1	153615424	153615926
chr1_153647909_153648411	chr1	153647909	153648411
chr1_153649508_153650010	chr1	153649508	153650010
chr1_153671042_153671544	chr1	153671042	153671544
chr1_153957668_153958170	chr1	153957668	153958170
chr1_153963185_153963687	chr1	153963185	153963687
chr1_153967170_153967672	chr1	153967170	153967672
chr1_153976963_153977465	chr1	153976963	153977465
chr1_153990690_153991192	chr1	153990690	153991192
chr1_154154484_154154986	chr1	154154484	154154986
chr1_154182976_154183478	chr1	154182976	154183478
chr1_154220145_154220647	chr1	154220145	154220647
chr1_154221214_154221716	chr1	154221214	154221716
chr1_154936468_154936970	chr1	154936468	154936970
chr1_154961676_154962178	chr1	154961676	154962178
chr1_154970329_154970831	chr1	154970329	154970831
chr1_154989501_154990003	chr1	154989501	154990003
chr1_154993165_154993667	chr1	154993165	154993667
chr1_155016335_155016837	chr1	155016335	155016837
chr1_155018536_155019038	chr1	155018536	155019038
chr1_155070227_155070729	chr1	155070227	155070729
chr1_155071096_155071598	chr1	155071096	155071598
chr1_155071869_155072371	chr1	155071869	155072371
chr1_155135716_155136218	chr1	155135716	155136218
chr1_155140262_155140764	chr1	155140262	155140764
chr1_155181791_155182293	chr1	155181791	155182293
chr1_155185656_155186158	chr1	155185656	155186158
chr1_155192552_155193054	chr1	155192552	155193054
chr1_155193637_155194139	chr1	155193637	155194139
chr1_155209082_155209584	chr1	155209082	155209584
chr1_155320409_155320911	chr1	155320409	155320911
chr1_155324248_155324750	chr1	155324248	155324750
chr1_155325240_155325742	chr1	155325240	155325742
chr1_155562915_155563417	chr1	155562915	155563417
chr1_155688374_155688876	chr1	155688374	155688876
chr1_155911065_155911567	chr1	155911065	155911567
chr1_155934041_155934543	chr1	155934041	155934543
chr1_155941249_155941751	chr1	155941249	155941751
chr1_155941944_155942446	chr1	155941944	155942446
chr1_156053552_156054054	chr1	156053552	156054054
chr1_156054649_156055151	chr1	156054649	156055151
chr1_156114309_156114811	chr1	156114309	156114811
chr1_156115475_156115977	chr1	156115475	156115977
chr1_156120000_156120502	chr1	156120000	156120502
chr1_156122606_156123108	chr1	156122606	156123108
chr1_156123466_156123968	chr1	156123466	156123968
chr1_156124779_156125281	chr1	156124779	156125281
chr1_156126447_156126949	chr1	156126447	156126949
chr1_156129851_156130353	chr1	156129851	156130353
chr1_156130488_156130990	chr1	156130488	156130990
chr1_156134913_156135415	chr1	156134913	156135415
chr1_156136045_156136547	chr1	156136045	156136547
chr1_156137342_156137844	chr1	156137342	156137844
chr1_156138468_156138970	chr1	156138468	156138970
chr1_156139862_156140364	chr1	156139862	156140364
chr1_156141280_156141782	chr1	156141280	156141782
chr1_156143308_156143810	chr1	156143308	156143810
chr1_156144562_156145064	chr1	156144562	156145064
chr1_156146727_156147229	chr1	156146727	156147229
chr1_156148158_156148660	chr1	156148158	156148660
chr1_156149722_156150224	chr1	156149722	156150224
chr1_156212891_156213393	chr1	156212891	156213393
chr1_156246376_156246878	chr1	156246376	156246878
chr1_156282460_156282962	chr1	156282460	156282962
chr1_156456554_156457056	chr1	156456554	156457056
chr1_156500793_156501295	chr1	156500793	156501295
chr1_156592143_156592645	chr1	156592143	156592645
chr1_156593349_156593851	chr1	156593349	156593851
chr1_156594862_156595364	chr1	156594862	156595364
chr1_156638069_156638571	chr1	156638069	156638571
chr1_156647210_156647712	chr1	156647210	156647712
chr1_156648455_156648957	chr1	156648455	156648957
chr1_156652656_156653158	chr1	156652656	156653158
chr1_156660266_156660768	chr1	156660266	156660768
chr1_156661209_156661711	chr1	156661209	156661711
chr1_156728450_156728952	chr1	156728450	156728952
chr1_156740691_156741193	chr1	156740691	156741193
chr1_156746715_156747217	chr1	156746715	156747217
chr1_157138303_157138805	chr1	157138303	157138805
chr1_159141399_159141901	chr1	159141399	159141901
chr1_159780774_159781276	chr1	159780774	159781276
chr1_159913687_159914189	chr1	159913687	159914189
chr1_159924988_159925490	chr1	159924988	159925490
chr1_160262103_160262605	chr1	160262103	160262605
chr1_160343036_160343538	chr1	160343036	160343538
chr1_161038539_161039041	chr1	161038539	161039041
chr1_161115028_161115530	chr1	161115028	161115530
chr1_161118681_161119183	chr1	161118681	161119183
chr1_161159329_161159831	chr1	161159329	161159831
chr1_161177334_161177836	chr1	161177334	161177836
chr1_161399539_161400041	chr1	161399539	161400041
chr1_161421901_161422403	chr1	161421901	161422403
chr1_161427912_161428414	chr1	161427912	161428414
chr1_161480345_161480847	chr1	161480345	161480847
chr1_161523638_161524140	chr1	161523638	161524140
chr1_161530337_161530839	chr1	161530337	161530839
chr1_161540040_161540542	chr1	161540040	161540542
chr1_161612497_161612999	chr1	161612497	161612999
chr1_161749897_161750399	chr1	161749897	161750399
chr1_162561011_162561513	chr1	162561011	162561513
chr1_162561576_162562078	chr1	162561576	162562078
chr1_165827424_165827926	chr1	165827424	165827926
chr1_165827997_165828499	chr1	165827997	165828499
chr1_166839077_166839579	chr1	166839077	166839579
chr1_167220144_167220646	chr1	167220144	167220646
chr1_167553473_167553975	chr1	167553473	167553975
chr1_167714802_167715304	chr1	167714802	167715304
chr1_167936287_167936789	chr1	167936287	167936789
chr1_169106135_169106637	chr1	169106135	169106637
chr1_169107041_169107543	chr1	169107041	169107543
chr1_169112057_169112559	chr1	169112057	169112559
chr1_169116142_169116644	chr1	169116142	169116644
chr1_169119978_169120480	chr1	169119978	169120480
chr1_169125639_169126141	chr1	169125639	169126141
chr1_169131010_169131512	chr1	169131010	169131512
chr1_169135902_169136404	chr1	169135902	169136404
chr1_169137484_169137986	chr1	169137484	169137986
chr1_169485624_169486126	chr1	169485624	169486126
chr1_169893567_169894069	chr1	169893567	169894069
chr1_173861571_173862073	chr1	173861571	173862073
chr1_173862819_173863321	chr1	173862819	173863321
chr1_173867588_173868090	chr1	173867588	173868090
chr1_174022180_174022682	chr1	174022180	174022682
chr1_174159017_174159519	chr1	174159017	174159519
chr1_174999100_174999602	chr1	174999100	174999602
chr1_176207106_176207608	chr1	176207106	176207608
chr1_178093916_178094418	chr1	178093916	178094418
chr1_179026229_179026731	chr1	179026229	179026731
chr1_179142770_179143272	chr1	179142770	179143272
chr1_180116998_180117500	chr1	180116998	180117500
chr1_180502426_180502928	chr1	180502426	180502928
chr1_181088552_181089054	chr1	181088552	181089054
chr1_182391480_182391982	chr1	182391480	182391982
chr1_182839114_182839616	chr1	182839114	182839616
chr1_183149383_183149885	chr1	183149383	183149885
chr1_183186031_183186533	chr1	183186031	183186533
chr1_183189082_183189584	chr1	183189082	183189584
chr1_183203772_183204274	chr1	183203772	183204274
chr1_183206347_183206849	chr1	183206347	183206849
chr1_183218728_183219230	chr1	183218728	183219230
chr1_183228312_183228814	chr1	183228312	183228814
chr1_183237585_183238087	chr1	183237585	183238087
chr1_183245772_183246274	chr1	183245772	183246274
chr1_183249392_183249894	chr1	183249392	183249894
chr1_183250249_183250751	chr1	183250249	183250751
chr1_183251980_183252482	chr1	183251980	183252482
chr1_183471279_183471781	chr1	183471279	183471781
chr1_184386573_184387075	chr1	184386573	184387075
chr1_185316151_185316653	chr1	185316151	185316653
chr1_185316875_185317377	chr1	185316875	185317377
chr1_192808799_192809301	chr1	192808799	192809301
chr1_193105030_193105532	chr1	193105030	193105532
chr1_197201034_197201536	chr1	197201034	197201536
chr1_197902496_197902998	chr1	197902496	197902998
chr1_200669402_200669904	chr1	200669402	200669904
chr1_200894763_200895265	chr1	200894763	200895265
chr1_200916051_200916553	chr1	200916051	200916553
chr1_200916822_200917324	chr1	200916822	200917324
chr1_201378540_201379042	chr1	201378540	201379042
chr1_201379764_201380266	chr1	201379764	201380266
chr1_201381577_201382079	chr1	201381577	201382079
chr1_201383091_201383593	chr1	201383091	201383593
chr1_201461563_201462065	chr1	201461563	201462065
chr1_201468854_201469356	chr1	201468854	201469356
chr1_202010667_202011169	chr1	202010667	202011169
chr1_202012903_202013405	chr1	202012903	202013405
chr1_202018052_202018554	chr1	202018052	202018554
chr1_202888854_202889356	chr1	202888854	202889356
chr1_203006947_203007449	chr1	203006947	203007449
chr1_203858901_203859403	chr1	203858901	203859403
chr1_204213518_204214020	chr1	204213518	204214020
chr1_204506517_204507019	chr1	204506517	204507019
chr1_205450458_205450960	chr1	205450458	205450960
chr1_205749547_205750049	chr1	205749547	205750049
chr1_206006370_206006872	chr1	206006370	206006872
chr1_206023502_206024004	chr1	206023502	206024004
chr1_209431492_209431994	chr1	209431492	209431994
chr1_209433806_209434308	chr1	209433806	209434308
chr1_209607835_209608337	chr1	209607835	209608337
chr1_209608636_209609138	chr1	209608636	209609138
chr1_209609580_209610082	chr1	209609580	209610082
chr1_209610438_209610940	chr1	209610438	209610940
chr1_209611592_209612094	chr1	209611592	209612094
chr1_209612882_209613384	chr1	209612882	209613384
chr1_209615122_209615624	chr1	209615122	209615624
chr1_209618045_209618547	chr1	209618045	209618547
chr1_209624164_209624666	chr1	209624164	209624666
chr1_209627175_209627677	chr1	209627175	209627677
chr1_209630705_209631207	chr1	209630705	209631207
chr1_209634391_209634893	chr1	209634391	209634893
chr1_209636458_209636960	chr1	209636458	209636960
chr1_209637624_209638126	chr1	209637624	209638126
chr1_209639924_209640426	chr1	209639924	209640426
chr1_209652135_209652637	chr1	209652135	209652637
chr1_211382523_211383025	chr1	211382523	211383025
chr1_212608550_212609052	chr1	212608550	212609052
chr1_218345673_218346175	chr1	218345673	218346175
chr1_220272103_220272605	chr1	220272103	220272605
chr1_222464780_222465282	chr1	222464780	222465282
chr1_222643815_222644317	chr1	222643815	222644317
chr1_222713185_222713687	chr1	222713185	222713687
chr1_223532504_223533006	chr1	223532504	223533006
chr1_223534327_223534829	chr1	223534327	223534829
chr1_223558419_223558921	chr1	223558419	223558921
chr1_223701037_223701539	chr1	223701037	223701539
chr1_223776315_223776817	chr1	223776315	223776817
chr1_223845997_223846499	chr1	223845997	223846499
chr1_223992312_223992814	chr1	223992312	223992814
chr1_224113917_224114419	chr1	224113917	224114419
chr1_225839133_225839635	chr1	225839133	225839635
chr1_225843990_225844492	chr1	225843990	225844492
chr1_225849171_225849673	chr1	225849171	225849673
chr1_225852603_225853105	chr1	225852603	225853105
chr1_225860486_225860988	chr1	225860486	225860988
chr1_225861991_225862493	chr1	225861991	225862493
chr1_225865460_225865962	chr1	225865460	225865962
chr1_225868760_225869262	chr1	225868760	225869262
chr1_225873910_225874412	chr1	225873910	225874412
chr1_225999254_225999756	chr1	225999254	225999756
chr1_226061651_226062153	chr1	226061651	226062153
chr1_226122382_226122884	chr1	226122382	226122884
chr1_226134099_226134601	chr1	226134099	226134601
chr1_226135140_226135642	chr1	226135140	226135642
chr1_226352936_226353438	chr1	226352936	226353438
chr1_226939640_226940142	chr1	226939640	226940142
chr1_226981378_226981880	chr1	226981378	226981880
chr1_226983315_226983817	chr1	226983315	226983817
chr1_226984817_226985319	chr1	226984817	226985319
chr1_226985875_226986377	chr1	226985875	226986377
chr1_226987714_226988216	chr1	226987714	226988216
chr1_227318178_227318680	chr1	227318178	227318680
chr1_227728955_227729457	chr1	227728955	227729457
chr1_227730623_227731125	chr1	227730623	227731125
chr1_227735281_227735783	chr1	227735281	227735783
chr1_228072806_228073308	chr1	228072806	228073308
chr1_228075400_228075902	chr1	228075400	228075902
chr1_228076800_228077302	chr1	228076800	228077302
chr1_228097363_228097865	chr1	228097363	228097865
chr1_228098493_228098995	chr1	228098493	228098995
chr1_228099578_228100080	chr1	228099578	228100080
chr1_228100894_228101396	chr1	228100894	228101396
chr1_228101505_228102007	chr1	228101505	228102007
chr1_228102074_228102576	chr1	228102074	228102576
chr1_228109293_228109795	chr1	228109293	228109795
chr1_228151511_228152013	chr1	228151511	228152013
chr1_228182219_228182721	chr1	228182219	228182721
chr1_228394929_228395431	chr1	228394929	228395431
chr1_228621934_228622436	chr1	228621934	228622436
chr1_228635375_228635877	chr1	228635375	228635877
chr1_230978921_230979423	chr1	230978921	230979423
chr1_231240868_231241370	chr1	231240868	231241370
chr1_231337572_231338074	chr1	231337572	231338074
chr1_231422196_231422698	chr1	231422196	231422698
chr1_231528491_231528993	chr1	231528491	231528993
chr1_234478047_234478549	chr1	234478047	234478549
chr1_234478794_234479296	chr1	234478794	234479296
chr1_234600028_234600530	chr1	234600028	234600530
chr1_234607182_234607684	chr1	234607182	234607684
chr1_234608145_234608647	chr1	234608145	234608647
chr1_234610556_234611058	chr1	234610556	234611058
chr1_234611134_234611636	chr1	234611134	234611636
chr1_234611824_234612326	chr1	234611824	234612326
chr1_235128493_235128995	chr1	235128493	235128995
chr1_235160993_235161495	chr1	235160993	235161495
chr1_236795039_236795541	chr1	236795039	236795541
chr1_241639835_241640337	chr1	241639835	241640337
chr1_241640381_241640883	chr1	241640381	241640883
chr1_244451042_244451544	chr1	244451042	244451544
chr1_244451621_244452123	chr1	244451621	244452123
chr1_244652948_244653450	chr1	244652948	244653450
chr1_244833793_244834295	chr1	244833793	244834295
chr1_244835422_244835924	chr1	244835422	244835924
chr1_244838677_244839179	chr1	244838677	244839179
chr1_244844356_244844858	chr1	244844356	244844858
chr1_244863054_244863556	chr1	244863054	244863556
chr1_246931664_246932166	chr1	246931664	246932166
chr1_248847169_248847671	chr1	248847169	248847671
chr1_248850444_248850946	chr1	248850444	248850946
chr1_248851326_248851828	chr1	248851326	248851828
chr1_248853659_248854161	chr1	248853659	248854161
chr1_248858961_248859463	chr1	248858961	248859463
chr1_248873806_248874308	chr1	248873806	248874308
chr1_248906071_248906573	chr1	248906071	248906573
chr10_789926_790428	chr10	789926	790428
chr10_791563_792065	chr10	791563	792065
chr10_802406_802908	chr10	802406	802908
chr10_803272_803774	chr10	803272	803774
chr10_931854_932356	chr10	931854	932356
chr10_987903_988405	chr10	987903	988405
chr10_1036494_1036996	chr10	1036494	1036996
chr10_1048760_1049262	chr10	1048760	1049262
chr10_1056655_1057157	chr10	1056655	1057157
chr10_3124713_3125215	chr10	3124713	3125215
chr10_3143245_3143747	chr10	3143245	3143747
chr10_3172491_3172993	chr10	3172491	3172993
chr10_3173472_3173974	chr10	3173472	3173974
chr10_3775301_3775803	chr10	3775301	3775803
chr10_3775920_3776422	chr10	3775920	3776422
chr10_3785594_3786096	chr10	3785594	3786096
chr10_3808572_3809074	chr10	3808572	3809074
chr10_4973202_4973704	chr10	4973202	4973704
chr10_4975974_4976476	chr10	4975974	4976476
chr10_4983417_4983919	chr10	4983417	4983919
chr10_4986131_4986633	chr10	4986131	4986633
chr10_5001915_5002417	chr10	5001915	5002417
chr10_5107850_5108352	chr10	5107850	5108352
chr10_5109786_5110288	chr10	5109786	5110288
chr10_5446422_5446924	chr10	5446422	5446924
chr10_5546380_5546882	chr10	5546380	5546882
chr10_5596752_5597254	chr10	5596752	5597254
chr10_5813242_5813744	chr10	5813242	5813744
chr10_6120571_6121073	chr10	6120571	6121073
chr10_6163583_6164085	chr10	6163583	6164085
chr10_6178435_6178937	chr10	6178435	6178937
chr10_6202739_6203241	chr10	6202739	6203241
chr10_7818041_7818543	chr10	7818041	7818543
chr10_8053466_8053968	chr10	8053466	8053968
chr10_11451519_11452021	chr10	11451519	11452021
chr10_11875825_11876327	chr10	11875825	11876327
chr10_11881538_11882040	chr10	11881538	11882040
chr10_12129168_12129670	chr10	12129168	12129670
chr10_13302003_13302505	chr10	13302003	13302505
chr10_14185557_14186059	chr10	14185557	14186059
chr10_14838146_14838648	chr10	14838146	14838648
chr10_15096954_15097456	chr10	15096954	15097456
chr10_16436833_16437335	chr10	16436833	16437335
chr10_16817180_16817682	chr10	16817180	16817682
chr10_18659250_18659752	chr10	18659250	18659752
chr10_21533616_21534118	chr10	21533616	21534118
chr10_22229237_22229739	chr10	22229237	22229739
chr10_25016491_25016993	chr10	25016491	25016993
chr10_28677323_28677825	chr10	28677323	28677825
chr10_32893369_32893871	chr10	32893369	32893871
chr10_32958340_32958842	chr10	32958340	32958842
chr10_32980435_32980937	chr10	32980435	32980937
chr10_35127030_35127532	chr10	35127030	35127532
chr10_37857600_37858102	chr10	37857600	37858102
chr10_38010637_38011139	chr10	38010637	38011139
chr10_42638204_42638706	chr10	42638204	42638706
chr10_42782466_42782968	chr10	42782466	42782968
chr10_43383862_43384364	chr10	43383862	43384364
chr10_43386882_43387384	chr10	43386882	43387384
chr10_43396024_43396526	chr10	43396024	43396526
chr10_43407486_43407988	chr10	43407486	43407988
chr10_43409096_43409598	chr10	43409096	43409598
chr10_43420523_43421025	chr10	43420523	43421025
chr10_44978504_44979006	chr10	44978504	44979006
chr10_46375491_46375993	chr10	46375491	46375993
chr10_46377826_46378328	chr10	46377826	46378328
chr10_46392870_46393372	chr10	46392870	46393372
chr10_46396917_46397419	chr10	46396917	46397419
chr10_47466379_47466881	chr10	47466379	47466881
chr10_47467463_47467965	chr10	47467463	47467965
chr10_47481347_47481849	chr10	47481347	47481849
chr10_47483821_47484323	chr10	47483821	47484323
chr10_47969864_47970366	chr10	47969864	47970366
chr10_47991500_47992002	chr10	47991500	47992002
chr10_52314207_52314709	chr10	52314207	52314709
chr10_58269007_58269509	chr10	58269007	58269509
chr10_58334791_58335293	chr10	58334791	58335293
chr10_58385182_58385684	chr10	58385182	58385684
chr10_60778329_60778831	chr10	60778329	60778831
chr10_62250563_62251065	chr10	62250563	62251065
chr10_63521372_63521874	chr10	63521372	63521874
chr10_67764221_67764723	chr10	67764221	67764723
chr10_67884460_67884962	chr10	67884460	67884962
chr10_68331900_68332402	chr10	68331900	68332402
chr10_68956319_68956821	chr10	68956319	68956821
chr10_70146336_70146838	chr10	70146336	70146838
chr10_70170561_70171063	chr10	70170561	70171063
chr10_72215781_72216283	chr10	72215781	72216283
chr10_72273789_72274291	chr10	72273789	72274291
chr10_73096491_73096993	chr10	73096491	73096993
chr10_73246832_73247334	chr10	73246832	73247334
chr10_73252244_73252746	chr10	73252244	73252746
chr10_73495471_73495973	chr10	73495471	73495973
chr10_73772166_73772668	chr10	73772166	73772668
chr10_73910923_73911425	chr10	73910923	73911425
chr10_74176709_74177211	chr10	74176709	74177211
chr10_75233611_75234113	chr10	75233611	75234113
chr10_78033696_78034198	chr10	78033696	78034198
chr10_80144223_80144725	chr10	80144223	80144725
chr10_80524210_80524712	chr10	80524210	80524712
chr10_89643959_89644461	chr10	89643959	89644461
chr10_93893804_93894306	chr10	93893804	93894306
chr10_96513625_96514127	chr10	96513625	96514127
chr10_96720561_96721063	chr10	96720561	96721063
chr10_97498059_97498561	chr10	97498059	97498561
chr10_98446576_98447078	chr10	98446576	98447078
chr10_100912922_100913424	chr10	100912922	100913424
chr10_100986654_100987156	chr10	100986654	100987156
chr10_101782914_101783416	chr10	101782914	101783416
chr10_102152090_102152592	chr10	102152090	102152592
chr10_102399689_102400191	chr10	102399689	102400191
chr10_102743835_102744337	chr10	102743835	102744337
chr10_104035784_104036286	chr10	104035784	104036286
chr10_104037895_104038397	chr10	104037895	104038397
chr10_104056645_104057147	chr10	104056645	104057147
chr10_104268979_104269481	chr10	104268979	104269481
chr10_110007944_110008446	chr10	110007944	110008446
chr10_110226765_110227267	chr10	110226765	110227267
chr10_110919458_110919960	chr10	110919458	110919960
chr10_112446682_112447184	chr10	112446682	112447184
chr10_114526649_114527151	chr10	114526649	114527151
chr10_119030278_119030780	chr10	119030278	119030780
chr10_119596360_119596862	chr10	119596360	119596862
chr10_119597055_119597557	chr10	119597055	119597557
chr10_119892284_119892786	chr10	119892284	119892786
chr10_121927989_121928491	chr10	121927989	121928491
chr10_123154209_123154711	chr10	123154209	123154711
chr10_124418633_124419135	chr10	124418633	124419135
chr10_127871718_127872220	chr10	127871718	127872220
chr10_130110297_130110799	chr10	130110297	130110799
chr10_130188466_130188968	chr10	130188466	130188968
chr10_130189539_130190041	chr10	130189539	130190041
chr10_130190388_130190890	chr10	130190388	130190890
chr10_131900486_131900988	chr10	131900486	131900988
chr10_132429313_132429815	chr10	132429313	132429815
chr10_132430097_132430599	chr10	132430097	132430599
chr10_132775032_132775534	chr10	132775032	132775534
chr10_133349062_133349564	chr10	133349062	133349564
chr10_133350289_133350791	chr10	133350289	133350791
chr10_133352939_133353441	chr10	133352939	133353441
chr10_133422911_133423413	chr10	133422911	133423413
chr11_199280_199782	chr11	199280	199782
chr11_208748_209250	chr11	208748	209250
chr11_394004_394506	chr11	394004	394506
chr11_404206_404708	chr11	404206	404708
chr11_404840_405342	chr11	404840	405342
chr11_406111_406613	chr11	406111	406613
chr11_407625_408127	chr11	407625	408127
chr11_408798_409300	chr11	408798	409300
chr11_409474_409976	chr11	409474	409976
chr11_415084_415586	chr11	415084	415586
chr11_415892_416394	chr11	415892	416394
chr11_428347_428849	chr11	428347	428849
chr11_429104_429606	chr11	429104	429606
chr11_695686_696188	chr11	695686	696188
chr11_699733_700235	chr11	699733	700235
chr11_704824_705326	chr11	704824	705326
chr11_706358_706860	chr11	706358	706860
chr11_707632_708134	chr11	707632	708134
chr11_721340_721842	chr11	721340	721842
chr11_725072_725574	chr11	725072	725574
chr11_728202_728704	chr11	728202	728704
chr11_763067_763569	chr11	763067	763569
chr11_764354_764856	chr11	764354	764856
chr11_765334_765836	chr11	765334	765836
chr11_767210_767712	chr11	767210	767712
chr11_782126_782628	chr11	782126	782628
chr11_804657_805159	chr11	804657	805159
chr11_809228_809730	chr11	809228	809730
chr11_809831_810333	chr11	809831	810333
chr11_811332_811834	chr11	811332	811834
chr11_812208_812710	chr11	812208	812710
chr11_813503_814005	chr11	813503	814005
chr11_815673_816175	chr11	815673	816175
chr11_818727_819229	chr11	818727	819229
chr11_820687_821189	chr11	820687	821189
chr11_821984_822486	chr11	821984	822486
chr11_823874_824376	chr11	823874	824376
chr11_824669_825171	chr11	824669	825171
chr11_825735_826237	chr11	825735	826237
chr11_827641_828143	chr11	827641	828143
chr11_829436_829938	chr11	829436	829938
chr11_830180_830682	chr11	830180	830682
chr11_831291_831793	chr11	831291	831793
chr11_832192_832694	chr11	832192	832694
chr11_833584_834086	chr11	833584	834086
chr11_834673_835175	chr11	834673	835175
chr11_838219_838721	chr11	838219	838721
chr11_839158_839660	chr11	839158	839660
chr11_840028_840530	chr11	840028	840530
chr11_841177_841679	chr11	841177	841679
chr11_842130_842632	chr11	842130	842632
chr11_858750_859252	chr11	858750	859252
chr11_859794_860296	chr11	859794	860296
chr11_862987_863489	chr11	862987	863489
chr11_865162_865664	chr11	865162	865664
chr11_866299_866801	chr11	866299	866801
chr11_867859_868361	chr11	867859	868361
chr11_868718_869220	chr11	868718	869220
chr11_869278_869780	chr11	869278	869780
chr11_871492_871994	chr11	871492	871994
chr11_872586_873088	chr11	872586	873088
chr11_873108_873610	chr11	873108	873610
chr11_874766_875268	chr11	874766	875268
chr11_876231_876733	chr11	876231	876733
chr11_894217_894719	chr11	894217	894719
chr11_1223820_1224322	chr11	1223820	1224322
chr11_1225549_1226051	chr11	1225549	1226051
chr11_1228193_1228695	chr11	1228193	1228695
chr11_1232056_1232558	chr11	1232056	1232558
chr11_1234421_1234923	chr11	1234421	1234923
chr11_1236228_1236730	chr11	1236228	1236730
chr11_1240182_1240684	chr11	1240182	1240684
chr11_1244486_1244988	chr11	1244486	1244988
chr11_1246990_1247492	chr11	1246990	1247492
chr11_1248900_1249402	chr11	1248900	1249402
chr11_1252354_1252856	chr11	1252354	1252856
chr11_1257888_1258390	chr11	1257888	1258390
chr11_1261952_1262454	chr11	1261952	1262454
chr11_1265344_1265846	chr11	1265344	1265846
chr11_1309598_1310100	chr11	1309598	1310100
chr11_1429012_1429514	chr11	1429012	1429514
chr11_1464485_1464987	chr11	1464485	1464987
chr11_1747184_1747686	chr11	1747184	1747686
chr11_1748372_1748874	chr11	1748372	1748874
chr11_1750019_1750521	chr11	1750019	1750521
chr11_1758011_1758513	chr11	1758011	1758513
chr11_1763024_1763526	chr11	1763024	1763526
chr11_1830579_1831081	chr11	1830579	1831081
chr11_2197716_2198218	chr11	2197716	2198218
chr11_2202649_2203151	chr11	2202649	2203151
chr11_2204602_2205104	chr11	2204602	2205104
chr11_2256645_2257147	chr11	2256645	2257147
chr11_2258167_2258669	chr11	2258167	2258669
chr11_2259461_2259963	chr11	2259461	2259963
chr11_2260630_2261132	chr11	2260630	2261132
chr11_2261698_2262200	chr11	2261698	2262200
chr11_2263103_2263605	chr11	2263103	2263605
chr11_2264389_2264891	chr11	2264389	2264891
chr11_2265953_2266455	chr11	2265953	2266455
chr11_2267475_2267977	chr11	2267475	2267977
chr11_2270212_2270714	chr11	2270212	2270714
chr11_2399883_2400385	chr11	2399883	2400385
chr11_2404947_2405449	chr11	2404947	2405449
chr11_2425408_2425910	chr11	2425408	2425910
chr11_2426653_2427155	chr11	2426653	2427155
chr11_6319941_6320443	chr11	6319941	6320443
chr11_6607931_6608433	chr11	6607931	6608433
chr11_6611462_6611964	chr11	6611462	6611964
chr11_6612186_6612688	chr11	6612186	6612688
chr11_6683073_6683575	chr11	6683073	6683575
chr11_7577125_7577627	chr11	7577125	7577627
chr11_7665635_7666137	chr11	7665635	7666137
chr11_7672892_7673394	chr11	7672892	7673394
chr11_7673733_7674235	chr11	7673733	7674235
chr11_8682586_8683088	chr11	8682586	8683088
chr11_8683457_8683959	chr11	8683457	8683959
chr11_8688185_8688687	chr11	8688185	8688687
chr11_8688713_8689215	chr11	8688713	8689215
chr11_8964260_8964762	chr11	8964260	8964762
chr11_9384458_9384960	chr11	9384458	9384960
chr11_9460347_9460849	chr11	9460347	9460849
chr11_10304730_10305232	chr11	10304730	10305232
chr11_10807778_10808280	chr11	10807778	10808280
chr11_10808749_10809251	chr11	10808749	10809251
chr11_11841419_11841921	chr11	11841419	11841921
chr11_13462843_13463345	chr11	13462843	13463345
chr11_14499499_14500001	chr11	14499499	14500001
chr11_16738362_16738864	chr11	16738362	16738864
chr11_17076351_17076853	chr11	17076351	17076853
chr11_17077483_17077985	chr11	17077483	17077985
chr11_17207841_17208343	chr11	17207841	17208343
chr11_17492824_17493326	chr11	17492824	17493326
chr11_17500504_17501006	chr11	17500504	17501006
chr11_17502004_17502506	chr11	17502004	17502506
chr11_17503690_17504192	chr11	17503690	17504192
chr11_18012653_18013155	chr11	18012653	18013155
chr11_18394361_18394863	chr11	18394361	18394863
chr11_18409893_18410395	chr11	18409893	18410395
chr11_18526780_18527282	chr11	18526780	18527282
chr11_18634049_18634551	chr11	18634049	18634551
chr11_20387045_20387547	chr11	20387045	20387547
chr11_20387673_20388175	chr11	20387673	20388175
chr11_22829475_22829977	chr11	22829475	22829977
chr11_27362933_27363435	chr11	27362933	27363435
chr11_30322927_30323429	chr11	30322927	30323429
chr11_31369720_31370222	chr11	31369720	31370222
chr11_33257946_33258448	chr11	33257946	33258448
chr11_33692896_33693398	chr11	33692896	33693398
chr11_33699619_33700121	chr11	33699619	33700121
chr11_33700683_33701185	chr11	33700683	33701185
chr11_34051644_34052146	chr11	34051644	34052146
chr11_34105319_34105821	chr11	34105319	34105821
chr11_34154200_34154702	chr11	34154200	34154702
chr11_34438712_34439214	chr11	34438712	34439214
chr11_34648748_34649250	chr11	34648748	34649250
chr11_34916436_34916938	chr11	34916436	34916938
chr11_43358810_43359312	chr11	43358810	43359312
chr11_44929929_44930431	chr11	44929929	44930431
chr11_45804779_45805281	chr11	45804779	45805281
chr11_45906035_45906537	chr11	45906035	45906537
chr11_45907468_45907970	chr11	45907468	45907970
chr11_45917577_45918079	chr11	45917577	45918079
chr11_46121212_46121714	chr11	46121212	46121714
chr11_46243070_46243572	chr11	46243070	46243572
chr11_46378759_46379261	chr11	46378759	46379261
chr11_46379478_46379980	chr11	46379478	46379980
chr11_46380820_46381322	chr11	46380820	46381322
chr11_46616885_46617387	chr11	46616885	46617387
chr11_46617490_46617992	chr11	46617490	46617992
chr11_46677160_46677662	chr11	46677160	46677662
chr11_46700251_46700753	chr11	46700251	46700753
chr11_47269222_47269724	chr11	47269222	47269724
chr11_47269931_47270433	chr11	47269931	47270433
chr11_47415451_47415953	chr11	47415451	47415953
chr11_47418677_47419179	chr11	47418677	47419179
chr11_57294614_57295116	chr11	57294614	57295116
chr11_57311139_57311641	chr11	57311139	57311641
chr11_57741306_57741808	chr11	57741306	57741808
chr11_57823804_57824306	chr11	57823804	57824306
chr11_59550623_59551125	chr11	59550623	59551125
chr11_59551543_59552045	chr11	59551543	59552045
chr11_59556246_59556748	chr11	59556246	59556748
chr11_59557206_59557708	chr11	59557206	59557708
chr11_59560199_59560701	chr11	59560199	59560701
chr11_59565964_59566466	chr11	59565964	59566466
chr11_59668699_59669201	chr11	59668699	59669201
chr11_59810273_59810775	chr11	59810273	59810775
chr11_61392223_61392725	chr11	61392223	61392725
chr11_61770086_61770588	chr11	61770086	61770588
chr11_61962241_61962743	chr11	61962241	61962743
chr11_61963804_61964306	chr11	61963804	61964306
chr11_61967183_61967685	chr11	61967183	61967685
chr11_62512067_62512569	chr11	62512067	62512569
chr11_62513422_62513924	chr11	62513422	62513924
chr11_62553448_62553950	chr11	62553448	62553950
chr11_62556234_62556736	chr11	62556234	62556736
chr11_62574042_62574544	chr11	62574042	62574544
chr11_62621704_62622206	chr11	62621704	62622206
chr11_62646375_62646877	chr11	62646375	62646877
chr11_62665359_62665861	chr11	62665359	62665861
chr11_62787274_62787776	chr11	62787274	62787776
chr11_62791611_62792113	chr11	62791611	62792113
chr11_62805158_62805660	chr11	62805158	62805660
chr11_62839125_62839627	chr11	62839125	62839627
chr11_62840040_62840542	chr11	62840040	62840542
chr11_62841070_62841572	chr11	62841070	62841572
chr11_62850727_62851229	chr11	62850727	62851229
chr11_62855537_62856039	chr11	62855537	62856039
chr11_62880746_62881248	chr11	62880746	62881248
chr11_62890000_62890502	chr11	62890000	62890502
chr11_62890780_62891282	chr11	62890780	62891282
chr11_63961113_63961615	chr11	63961113	63961615
chr11_63962344_63962846	chr11	63962344	63962846
chr11_64206635_64207137	chr11	64206635	64207137
chr11_64224185_64224687	chr11	64224185	64224687
chr11_64226159_64226661	chr11	64226159	64226661
chr11_64230301_64230803	chr11	64230301	64230803
chr11_64240664_64241166	chr11	64240664	64241166
chr11_64241930_64242432	chr11	64241930	64242432
chr11_64243426_64243928	chr11	64243426	64243928
chr11_64245693_64246195	chr11	64245693	64246195
chr11_64246939_64247441	chr11	64246939	64247441
chr11_64250881_64251383	chr11	64250881	64251383
chr11_64268251_64268753	chr11	64268251	64268753
chr11_64269549_64270051	chr11	64269549	64270051
chr11_64306254_64306756	chr11	64306254	64306756
chr11_64315967_64316469	chr11	64315967	64316469
chr11_64317072_64317574	chr11	64317072	64317574
chr11_64372881_64373383	chr11	64372881	64373383
chr11_64759813_64760315	chr11	64759813	64760315
chr11_64762126_64762628	chr11	64762126	64762628
chr11_64878325_64878827	chr11	64878325	64878827
chr11_64885226_64885728	chr11	64885226	64885728
chr11_64888036_64888538	chr11	64888036	64888538
chr11_64893174_64893676	chr11	64893174	64893676
chr11_65111787_65112289	chr11	65111787	65112289
chr11_65112878_65113380	chr11	65112878	65113380
chr11_65115657_65116159	chr11	65115657	65116159
chr11_65117443_65117945	chr11	65117443	65117945
chr11_65134446_65134948	chr11	65134446	65134948
chr11_65213490_65213992	chr11	65213490	65213992
chr11_65215692_65216194	chr11	65215692	65216194
chr11_65326401_65326903	chr11	65326401	65326903
chr11_65423133_65423635	chr11	65423133	65423635
chr11_65424519_65425021	chr11	65424519	65425021
chr11_65426299_65426801	chr11	65426299	65426801
chr11_65427075_65427577	chr11	65427075	65427577
chr11_65427663_65428165	chr11	65427663	65428165
chr11_65429527_65430029	chr11	65429527	65430029
chr11_65435844_65436346	chr11	65435844	65436346
chr11_65437725_65438227	chr11	65437725	65438227
chr11_65440346_65440848	chr11	65440346	65440848
chr11_65442095_65442597	chr11	65442095	65442597
chr11_65444575_65445077	chr11	65444575	65445077
chr11_65448469_65448971	chr11	65448469	65448971
chr11_65498817_65499319	chr11	65498817	65499319
chr11_65500353_65500855	chr11	65500353	65500855
chr11_65506729_65507231	chr11	65506729	65507231
chr11_65507937_65508439	chr11	65507937	65508439
chr11_65537506_65538008	chr11	65537506	65538008
chr11_65574611_65575113	chr11	65574611	65575113
chr11_65638598_65639100	chr11	65638598	65639100
chr11_65652969_65653471	chr11	65652969	65653471
chr11_65850699_65851201	chr11	65850699	65851201
chr11_65852575_65853077	chr11	65852575	65853077
chr11_65857201_65857703	chr11	65857201	65857703
chr11_65857855_65858357	chr11	65857855	65858357
chr11_65869816_65870318	chr11	65869816	65870318
chr11_65882764_65883266	chr11	65882764	65883266
chr11_65888125_65888627	chr11	65888125	65888627
chr11_65890263_65890765	chr11	65890263	65890765
chr11_65891461_65891963	chr11	65891461	65891963
chr11_65892743_65893245	chr11	65892743	65893245
chr11_65893773_65894275	chr11	65893773	65894275
chr11_65895464_65895966	chr11	65895464	65895966
chr11_65896306_65896808	chr11	65896306	65896808
chr11_65899516_65900018	chr11	65899516	65900018
chr11_65915647_65916149	chr11	65915647	65916149
chr11_65920064_65920566	chr11	65920064	65920566
chr11_65920997_65921499	chr11	65920997	65921499
chr11_65981903_65982405	chr11	65981903	65982405
chr11_66267382_66267884	chr11	66267382	66267884
chr11_66347975_66348477	chr11	66347975	66348477
chr11_66359559_66360061	chr11	66359559	66360061
chr11_66360425_66360927	chr11	66360425	66360927
chr11_66362688_66363190	chr11	66362688	66363190
chr11_66367417_66367919	chr11	66367417	66367919
chr11_66371090_66371592	chr11	66371090	66371592
chr11_66371805_66372307	chr11	66371805	66372307
chr11_66476858_66477360	chr11	66476858	66477360
chr11_66479730_66480232	chr11	66479730	66480232
chr11_66531798_66532300	chr11	66531798	66532300
chr11_66592981_66593483	chr11	66592981	66593483
chr11_66616418_66616920	chr11	66616418	66616920
chr11_66624492_66624994	chr11	66624492	66624994
chr11_66638356_66638858	chr11	66638356	66638858
chr11_66639558_66640060	chr11	66639558	66640060
chr11_66643572_66644074	chr11	66643572	66644074
chr11_66650106_66650608	chr11	66650106	66650608
chr11_66651196_66651698	chr11	66651196	66651698
chr11_66652546_66653048	chr11	66652546	66653048
chr11_66654353_66654855	chr11	66654353	66654855
chr11_66668698_66669200	chr11	66668698	66669200
chr11_66670705_66671207	chr11	66670705	66671207
chr11_66677682_66678184	chr11	66677682	66678184
chr11_66686862_66687364	chr11	66686862	66687364
chr11_66720311_66720813	chr11	66720311	66720813
chr11_66843201_66843703	chr11	66843201	66843703
chr11_66844633_66845135	chr11	66844633	66845135
chr11_66845235_66845737	chr11	66845235	66845737
chr11_66845810_66846312	chr11	66845810	66846312
chr11_66847558_66848060	chr11	66847558	66848060
chr11_66849435_66849937	chr11	66849435	66849937
chr11_66850699_66851201	chr11	66850699	66851201
chr11_66856435_66856937	chr11	66856435	66856937
chr11_66857332_66857834	chr11	66857332	66857834
chr11_66859340_66859842	chr11	66859340	66859842
chr11_66861264_66861766	chr11	66861264	66861766
chr11_66862013_66862515	chr11	66862013	66862515
chr11_67071523_67072025	chr11	67071523	67072025
chr11_67239772_67240274	chr11	67239772	67240274
chr11_67255853_67256355	chr11	67255853	67256355
chr11_67259778_67260280	chr11	67259778	67260280
chr11_67267747_67268249	chr11	67267747	67268249
chr11_67275676_67276178	chr11	67275676	67276178
chr11_67278548_67279050	chr11	67278548	67279050
chr11_67279151_67279653	chr11	67279151	67279653
chr11_67280711_67281213	chr11	67280711	67281213
chr11_67282715_67283217	chr11	67282715	67283217
chr11_67285011_67285513	chr11	67285011	67285513
chr11_67285690_67286192	chr11	67285690	67286192
chr11_67287667_67288169	chr11	67287667	67288169
chr11_67289510_67290012	chr11	67289510	67290012
chr11_67290049_67290551	chr11	67290049	67290551
chr11_67301472_67301974	chr11	67301472	67301974
chr11_67303046_67303548	chr11	67303046	67303548
chr11_67310756_67311258	chr11	67310756	67311258
chr11_67311645_67312147	chr11	67311645	67312147
chr11_67312575_67313077	chr11	67312575	67313077
chr11_67314117_67314619	chr11	67314117	67314619
chr11_67352952_67353454	chr11	67352952	67353454
chr11_67354938_67355440	chr11	67354938	67355440
chr11_67355733_67356235	chr11	67355733	67356235
chr11_67364616_67365118	chr11	67364616	67365118
chr11_67371823_67372325	chr11	67371823	67372325
chr11_67373682_67374184	chr11	67373682	67374184
chr11_67391586_67392088	chr11	67391586	67392088
chr11_67396397_67396899	chr11	67396397	67396899
chr11_67399164_67399666	chr11	67399164	67399666
chr11_67400385_67400887	chr11	67400385	67400887
chr11_67411312_67411814	chr11	67411312	67411814
chr11_67415101_67415603	chr11	67415101	67415603
chr11_67421170_67421672	chr11	67421170	67421672
chr11_67435099_67435601	chr11	67435099	67435601
chr11_67438127_67438629	chr11	67438127	67438629
chr11_67439994_67440496	chr11	67439994	67440496
chr11_67441154_67441656	chr11	67441154	67441656
chr11_67442543_67443045	chr11	67442543	67443045
chr11_67463120_67463622	chr11	67463120	67463622
chr11_67464254_67464756	chr11	67464254	67464756
chr11_67468249_67468751	chr11	67468249	67468751
chr11_67491878_67492380	chr11	67491878	67492380
chr11_67492821_67493323	chr11	67492821	67493323
chr11_67497821_67498323	chr11	67497821	67498323
chr11_67504774_67505276	chr11	67504774	67505276
chr11_67505632_67506134	chr11	67505632	67506134
chr11_67507716_67508218	chr11	67507716	67508218
chr11_67584844_67585346	chr11	67584844	67585346
chr11_67588845_67589347	chr11	67588845	67589347
chr11_67613882_67614384	chr11	67613882	67614384
chr11_67615398_67615900	chr11	67615398	67615900
chr11_67630325_67630827	chr11	67630325	67630827
chr11_67674199_67674701	chr11	67674199	67674701
chr11_67805412_67805914	chr11	67805412	67805914
chr11_67989439_67989941	chr11	67989439	67989941
chr11_67991018_67991520	chr11	67991018	67991520
chr11_67995812_67996314	chr11	67995812	67996314
chr11_67996888_67997390	chr11	67996888	67997390
chr11_68009990_68010492	chr11	68009990	68010492
chr11_68016216_68016718	chr11	68016216	68016718
chr11_68017157_68017659	chr11	68017157	68017659
chr11_68018834_68019336	chr11	68018834	68019336
chr11_68019631_68020133	chr11	68019631	68020133
chr11_68021354_68021856	chr11	68021354	68021856
chr11_68029459_68029961	chr11	68029459	68029961
chr11_68030129_68030631	chr11	68030129	68030631
chr11_68036393_68036895	chr11	68036393	68036895
chr11_68038110_68038612	chr11	68038110	68038612
chr11_68047784_68048286	chr11	68047784	68048286
chr11_68051372_68051874	chr11	68051372	68051874
chr11_68054776_68055278	chr11	68054776	68055278
chr11_68121575_68122077	chr11	68121575	68122077
chr11_68151507_68152009	chr11	68151507	68152009
chr11_68213817_68214319	chr11	68213817	68214319
chr11_68258035_68258537	chr11	68258035	68258537
chr11_68259214_68259716	chr11	68259214	68259716
chr11_68260448_68260950	chr11	68260448	68260950
chr11_68271572_68272074	chr11	68271572	68272074
chr11_68298768_68299270	chr11	68298768	68299270
chr11_68313455_68313957	chr11	68313455	68313957
chr11_68314703_68315205	chr11	68314703	68315205
chr11_68315417_68315919	chr11	68315417	68315919
chr11_68316909_68317411	chr11	68316909	68317411
chr11_68325221_68325723	chr11	68325221	68325723
chr11_68326559_68327061	chr11	68326559	68327061
chr11_68331130_68331632	chr11	68331130	68331632
chr11_68332334_68332836	chr11	68332334	68332836
chr11_68341314_68341816	chr11	68341314	68341816
chr11_68343385_68343887	chr11	68343385	68343887
chr11_68350702_68351204	chr11	68350702	68351204
chr11_68353382_68353884	chr11	68353382	68353884
chr11_68354799_68355301	chr11	68354799	68355301
chr11_68363659_68364161	chr11	68363659	68364161
chr11_68364862_68365364	chr11	68364862	68365364
chr11_68365405_68365907	chr11	68365405	68365907
chr11_68372623_68373125	chr11	68372623	68373125
chr11_68373201_68373703	chr11	68373201	68373703
chr11_68380849_68381351	chr11	68380849	68381351
chr11_68383367_68383869	chr11	68383367	68383869
chr11_68384666_68385168	chr11	68384666	68385168
chr11_68385288_68385790	chr11	68385288	68385790
chr11_68388553_68389055	chr11	68388553	68389055
chr11_68394627_68395129	chr11	68394627	68395129
chr11_68395700_68396202	chr11	68395700	68396202
chr11_68404239_68404741	chr11	68404239	68404741
chr11_68406341_68406843	chr11	68406341	68406843
chr11_68413703_68414205	chr11	68413703	68414205
chr11_68421533_68422035	chr11	68421533	68422035
chr11_68423390_68423892	chr11	68423390	68423892
chr11_68424300_68424802	chr11	68424300	68424802
chr11_68432573_68433075	chr11	68432573	68433075
chr11_68433362_68433864	chr11	68433362	68433864
chr11_68436273_68436775	chr11	68436273	68436775
chr11_68437150_68437652	chr11	68437150	68437652
chr11_68439644_68440146	chr11	68439644	68440146
chr11_68445642_68446144	chr11	68445642	68446144
chr11_68447185_68447687	chr11	68447185	68447687
chr11_68448435_68448937	chr11	68448435	68448937
chr11_68449962_68450464	chr11	68449962	68450464
chr11_68454081_68454583	chr11	68454081	68454583
chr11_68454670_68455172	chr11	68454670	68455172
chr11_68455227_68455729	chr11	68455227	68455729
chr11_68459879_68460381	chr11	68459879	68460381
chr11_68596984_68597486	chr11	68596984	68597486
chr11_68617211_68617713	chr11	68617211	68617713
chr11_68618076_68618578	chr11	68618076	68618578
chr11_68750821_68751323	chr11	68750821	68751323
chr11_68753336_68753838	chr11	68753336	68753838
chr11_68807380_68807882	chr11	68807380	68807882
chr11_68816612_68817114	chr11	68816612	68817114
chr11_68837211_68837713	chr11	68837211	68837713
chr11_68839355_68839857	chr11	68839355	68839857
chr11_68840930_68841432	chr11	68840930	68841432
chr11_69010817_69011319	chr11	69010817	69011319
chr11_69095014_69095516	chr11	69095014	69095516
chr11_69100722_69101224	chr11	69100722	69101224
chr11_69639108_69639610	chr11	69639108	69639610
chr11_69641015_69641517	chr11	69641015	69641517
chr11_69644664_69645166	chr11	69644664	69645166
chr11_69645255_69645757	chr11	69645255	69645757
chr11_69647607_69648109	chr11	69647607	69648109
chr11_69650194_69650696	chr11	69650194	69650696
chr11_69655933_69656435	chr11	69655933	69656435
chr11_69666456_69666958	chr11	69666456	69666958
chr11_69948460_69948962	chr11	69948460	69948962
chr11_69985636_69986138	chr11	69985636	69986138
chr11_70190719_70191221	chr11	70190719	70191221
chr11_70203045_70203547	chr11	70203045	70203547
chr11_70207649_70208151	chr11	70207649	70208151
chr11_70270158_70270660	chr11	70270158	70270660
chr11_70397986_70398488	chr11	70397986	70398488
chr11_70399110_70399612	chr11	70399110	70399612
chr11_70414597_70415099	chr11	70414597	70415099
chr11_70423394_70423896	chr11	70423394	70423896
chr11_70430387_70430889	chr11	70430387	70430889
chr11_70431647_70432149	chr11	70431647	70432149
chr11_70432717_70433219	chr11	70432717	70433219
chr11_70437040_70437542	chr11	70437040	70437542
chr11_70466661_70467163	chr11	70466661	70467163
chr11_71432852_71433354	chr11	71432852	71433354
chr11_71448056_71448558	chr11	71448056	71448558
chr11_71452914_71453416	chr11	71452914	71453416
chr11_71786482_71786984	chr11	71786482	71786984
chr11_71787463_71787965	chr11	71787463	71787965
chr11_71804199_71804701	chr11	71804199	71804701
chr11_71928882_71929384	chr11	71928882	71929384
chr11_72000707_72001209	chr11	72000707	72001209
chr11_72004145_72004647	chr11	72004145	72004647
chr11_72006002_72006504	chr11	72006002	72006504
chr11_72006962_72007464	chr11	72006962	72007464
chr11_72008811_72009313	chr11	72008811	72009313
chr11_72010395_72010897	chr11	72010395	72010897
chr11_72012080_72012582	chr11	72012080	72012582
chr11_72013580_72014082	chr11	72013580	72014082
chr11_72102893_72103395	chr11	72102893	72103395
chr11_72678106_72678608	chr11	72678106	72678608
chr11_72681616_72682118	chr11	72681616	72682118
chr11_72751514_72752016	chr11	72751514	72752016
chr11_72753568_72754070	chr11	72753568	72754070
chr11_72757361_72757863	chr11	72757361	72757863
chr11_72758522_72759024	chr11	72758522	72759024
chr11_72766401_72766903	chr11	72766401	72766903
chr11_72768022_72768524	chr11	72768022	72768524
chr11_72771267_72771769	chr11	72771267	72771769
chr11_72772043_72772545	chr11	72772043	72772545
chr11_72773300_72773802	chr11	72773300	72773802
chr11_72775110_72775612	chr11	72775110	72775612
chr11_72777078_72777580	chr11	72777078	72777580
chr11_72782109_72782611	chr11	72782109	72782611
chr11_72813705_72814207	chr11	72813705	72814207
chr11_72814357_72814859	chr11	72814357	72814859
chr11_72821817_72822319	chr11	72821817	72822319
chr11_72822646_72823148	chr11	72822646	72823148
chr11_72824829_72825331	chr11	72824829	72825331
chr11_72829947_72830449	chr11	72829947	72830449
chr11_73142393_73142895	chr11	73142393	73142895
chr11_73307654_73308156	chr11	73307654	73308156
chr11_73395495_73395997	chr11	73395495	73395997
chr11_73397656_73398158	chr11	73397656	73398158
chr11_73398965_73399467	chr11	73398965	73399467
chr11_73660648_73661150	chr11	73660648	73661150
chr11_73760935_73761437	chr11	73760935	73761437
chr11_73787860_73788362	chr11	73787860	73788362
chr11_73876641_73877143	chr11	73876641	73877143
chr11_73983094_73983596	chr11	73983094	73983596
chr11_74171154_74171656	chr11	74171154	74171656
chr11_74398768_74399270	chr11	74398768	74399270
chr11_74452754_74453256	chr11	74452754	74453256
chr11_74454123_74454625	chr11	74454123	74454625
chr11_74456923_74457425	chr11	74456923	74457425
chr11_74465325_74465827	chr11	74465325	74465827
chr11_74467036_74467538	chr11	74467036	74467538
chr11_74493316_74493818	chr11	74493316	74493818
chr11_74592627_74593129	chr11	74592627	74593129
chr11_74949001_74949503	chr11	74949001	74949503
chr11_74988466_74988968	chr11	74988466	74988968
chr11_75159467_75159969	chr11	75159467	75159969
chr11_75193481_75193983	chr11	75193481	75193983
chr11_75200285_75200787	chr11	75200285	75200787
chr11_75202356_75202858	chr11	75202356	75202858
chr11_75202884_75203386	chr11	75202884	75203386
chr11_75207604_75208106	chr11	75207604	75208106
chr11_75261425_75261927	chr11	75261425	75261927
chr11_75351732_75352234	chr11	75351732	75352234
chr11_75399410_75399912	chr11	75399410	75399912
chr11_75400164_75400666	chr11	75400164	75400666
chr11_75402657_75403159	chr11	75402657	75403159
chr11_75407538_75408040	chr11	75407538	75408040
chr11_75409676_75410178	chr11	75409676	75410178
chr11_75411597_75412099	chr11	75411597	75412099
chr11_75414960_75415462	chr11	75414960	75415462
chr11_75428312_75428814	chr11	75428312	75428814
chr11_76233675_76234177	chr11	76233675	76234177
chr11_76235389_76235891	chr11	76235389	76235891
chr11_76444411_76444913	chr11	76444411	76444913
chr11_76769512_76770014	chr11	76769512	76770014
chr11_76783260_76783762	chr11	76783260	76783762
chr11_76784109_76784611	chr11	76784109	76784611
chr11_76787229_76787731	chr11	76787229	76787731
chr11_76788630_76789132	chr11	76788630	76789132
chr11_76794348_76794850	chr11	76794348	76794850
chr11_76796128_76796630	chr11	76796128	76796630
chr11_76797801_76798303	chr11	76797801	76798303
chr11_76798967_76799469	chr11	76798967	76799469
chr11_76800308_76800810	chr11	76800308	76800810
chr11_76801223_76801725	chr11	76801223	76801725
chr11_76802762_76803264	chr11	76802762	76803264
chr11_76804137_76804639	chr11	76804137	76804639
chr11_76805229_76805731	chr11	76805229	76805731
chr11_76806073_76806575	chr11	76806073	76806575
chr11_76860824_76861326	chr11	76860824	76861326
chr11_77095463_77095965	chr11	77095463	77095965
chr11_77106549_77107051	chr11	77106549	77107051
chr11_77115244_77115746	chr11	77115244	77115746
chr11_77118059_77118561	chr11	77118059	77118561
chr11_77127166_77127668	chr11	77127166	77127668
chr11_77473675_77474177	chr11	77473675	77474177
chr11_77589711_77590213	chr11	77589711	77590213
chr11_77637499_77638001	chr11	77637499	77638001
chr11_78139293_78139795	chr11	78139293	78139795
chr11_82900164_82900666	chr11	82900164	82900666
chr11_83071926_83072428	chr11	83071926	83072428
chr11_83082149_83082651	chr11	83082149	83082651
chr11_83083191_83083693	chr11	83083191	83083693
chr11_83086291_83086793	chr11	83086291	83086793
chr11_83168803_83169305	chr11	83168803	83169305
chr11_83187191_83187693	chr11	83187191	83187693
chr11_83193400_83193902	chr11	83193400	83193902
chr11_83285929_83286431	chr11	83285929	83286431
chr11_85647770_85648272	chr11	85647770	85648272
chr11_85663855_85664357	chr11	85663855	85664357
chr11_85664580_85665082	chr11	85664580	85665082
chr11_85682456_85682958	chr11	85682456	85682958
chr11_85685631_85686133	chr11	85685631	85686133
chr11_85810847_85811349	chr11	85810847	85811349
chr11_86068999_86069501	chr11	86068999	86069501
chr11_86302086_86302588	chr11	86302086	86302588
chr11_88337444_88337946	chr11	88337444	88337946
chr11_93740993_93741495	chr11	93740993	93741495
chr11_93784491_93784993	chr11	93784491	93784993
chr11_95151119_95151621	chr11	95151119	95151621
chr11_95789208_95789710	chr11	95789208	95789710
chr11_96389783_96390285	chr11	96389783	96390285
chr11_102317407_102317909	chr11	102317407	102317909
chr11_102347060_102347562	chr11	102347060	102347562
chr11_102391593_102392095	chr11	102391593	102392095
chr11_103091858_103092360	chr11	103091858	103092360
chr11_111733492_111733994	chr11	111733492	111733994
chr11_112025301_112025803	chr11	112025301	112025803
chr11_112086026_112086528	chr11	112086026	112086528
chr11_112226231_112226733	chr11	112226231	112226733
chr11_113875575_113876077	chr11	113875575	113876077
chr11_114400136_114400638	chr11	114400136	114400638
chr11_116772933_116773435	chr11	116772933	116773435
chr11_116774583_116775085	chr11	116774583	116775085
chr11_117200656_117201158	chr11	117200656	117201158
chr11_117223639_117224141	chr11	117223639	117224141
chr11_117231583_117232085	chr11	117231583	117232085
chr11_117232150_117232652	chr11	117232150	117232652
chr11_118076937_118077439	chr11	118076937	118077439
chr11_118102795_118103297	chr11	118102795	118103297
chr11_118111624_118112126	chr11	118111624	118112126
chr11_118117028_118117530	chr11	118117028	118117530
chr11_118133703_118134205	chr11	118133703	118134205
chr11_118135730_118136232	chr11	118135730	118136232
chr11_118136908_118137410	chr11	118136908	118137410
chr11_118572443_118572945	chr11	118572443	118572945
chr11_118894381_118894883	chr11	118894381	118894883
chr11_118895376_118895878	chr11	118895376	118895878
chr11_118896308_118896810	chr11	118896308	118896810
chr11_118898594_118899096	chr11	118898594	118899096
chr11_118900373_118900875	chr11	118900373	118900875
chr11_118901849_118902351	chr11	118901849	118902351
chr11_118909636_118910138	chr11	118909636	118910138
chr11_118912349_118912851	chr11	118912349	118912851
chr11_119092761_119093263	chr11	119092761	119093263
chr11_119094046_119094548	chr11	119094046	119094548
chr11_119095139_119095641	chr11	119095139	119095641
chr11_123053101_123053603	chr11	123053101	123053603
chr11_123061543_123062045	chr11	123061543	123062045
chr11_123590375_123590877	chr11	123590375	123590877
chr11_123741295_123741797	chr11	123741295	123741797
chr11_124622581_124623083	chr11	124622581	124623083
chr11_124746447_124746949	chr11	124746447	124746949
chr11_124762019_124762521	chr11	124762019	124762521
chr11_124800288_124800790	chr11	124800288	124800790
chr11_124953861_124954363	chr11	124953861	124954363
chr11_125111265_125111767	chr11	125111265	125111767
chr11_125569325_125569827	chr11	125569325	125569827
chr11_125592769_125593271	chr11	125592769	125593271
chr11_125625684_125626186	chr11	125625684	125626186
chr11_125887678_125888180	chr11	125887678	125888180
chr11_126268732_126269234	chr11	126268732	126269234
chr11_126303681_126304183	chr11	126303681	126304183
chr11_126355108_126355610	chr11	126355108	126355610
chr11_128454759_128455261	chr11	128454759	128455261
chr11_128522365_128522867	chr11	128522365	128522867
chr11_128942531_128943033	chr11	128942531	128943033
chr11_128953064_128953566	chr11	128953064	128953566
chr11_128957139_128957641	chr11	128957139	128957641
chr11_129316108_129316610	chr11	129316108	129316610
chr11_129815776_129816278	chr11	129815776	129816278
chr11_129846686_129847188	chr11	129846686	129847188
chr11_129848358_129848860	chr11	129848358	129848860
chr11_129849375_129849877	chr11	129849375	129849877
chr11_129854917_129855419	chr11	129854917	129855419
chr11_129862133_129862635	chr11	129862133	129862635
chr11_129863154_129863656	chr11	129863154	129863656
chr11_129863722_129864224	chr11	129863722	129864224
chr11_129865556_129866058	chr11	129865556	129866058
chr11_129868325_129868827	chr11	129868325	129868827
chr11_129895346_129895848	chr11	129895346	129895848
chr11_130002284_130002786	chr11	130002284	130002786
chr11_130003156_130003658	chr11	130003156	130003658
chr11_130194531_130195033	chr11	130194531	130195033
chr11_130208321_130208823	chr11	130208321	130208823
chr11_130213741_130214243	chr11	130213741	130214243
chr11_130217148_130217650	chr11	130217148	130217650
chr11_130218547_130219049	chr11	130218547	130219049
chr11_130219912_130220414	chr11	130219912	130220414
chr11_130220995_130221497	chr11	130220995	130221497
chr11_133892870_133893372	chr11	133892870	133893372
chr11_133897113_133897615	chr11	133897113	133897615
chr11_133927797_133928299	chr11	133927797	133928299
chr11_133931027_133931529	chr11	133931027	133931529
chr11_133935763_133936265	chr11	133935763	133936265
chr11_133945375_133945877	chr11	133945375	133945877
chr11_134223647_134224149	chr11	134223647	134224149
chr11_134224169_134224671	chr11	134224169	134224671
chr11_134380102_134380604	chr11	134380102	134380604
chr11_134381469_134381971	chr11	134381469	134381971
chr11_134382505_134383007	chr11	134382505	134383007
chr11_134383744_134384246	chr11	134383744	134384246
chr12_752392_752894	chr12	752392	752894
chr12_990685_991187	chr12	990685	991187
chr12_2812555_2813057	chr12	2812555	2813057
chr12_2890261_2890763	chr12	2890261	2890763
chr12_6313087_6313589	chr12	6313087	6313589
chr12_6317100_6317602	chr12	6317100	6317602
chr12_6318465_6318967	chr12	6318465	6318967
chr12_6323740_6324242	chr12	6323740	6324242
chr12_6324820_6325322	chr12	6324820	6325322
chr12_6325427_6325929	chr12	6325427	6325929
chr12_6326381_6326883	chr12	6326381	6326883
chr12_6328338_6328840	chr12	6328338	6328840
chr12_6390915_6391417	chr12	6390915	6391417
chr12_6470385_6470887	chr12	6470385	6470887
chr12_6532497_6532999	chr12	6532497	6532999
chr12_6533436_6533938	chr12	6533436	6533938
chr12_6534360_6534862	chr12	6534360	6534862
chr12_6535954_6536456	chr12	6535954	6536456
chr12_6537818_6538320	chr12	6537818	6538320
chr12_6538501_6539003	chr12	6538501	6539003
chr12_6539797_6540299	chr12	6539797	6540299
chr12_6567994_6568496	chr12	6567994	6568496
chr12_6688983_6689485	chr12	6688983	6689485
chr12_6724092_6724594	chr12	6724092	6724594
chr12_6843057_6843559	chr12	6843057	6843559
chr12_6851974_6852476	chr12	6851974	6852476
chr12_6867553_6868055	chr12	6867553	6868055
chr12_6870121_6870623	chr12	6870121	6870623
chr12_6871209_6871711	chr12	6871209	6871711
chr12_6871746_6872248	chr12	6871746	6872248
chr12_6872343_6872845	chr12	6872343	6872845
chr12_6937672_6938174	chr12	6937672	6938174
chr12_6938803_6939305	chr12	6938803	6939305
chr12_6942388_6942890	chr12	6942388	6942890
chr12_6944014_6944516	chr12	6944014	6944516
chr12_6946374_6946876	chr12	6946374	6946876
chr12_6963030_6963532	chr12	6963030	6963532
chr12_6963667_6964169	chr12	6963667	6964169
chr12_6964649_6965151	chr12	6964649	6965151
chr12_6967047_6967549	chr12	6967047	6967549
chr12_6970098_6970600	chr12	6970098	6970600
chr12_7018049_7018551	chr12	7018049	7018551
chr12_7096039_7096541	chr12	7096039	7096541
chr12_7130281_7130783	chr12	7130281	7130783
chr12_8026773_8027275	chr12	8026773	8027275
chr12_8081946_8082448	chr12	8081946	8082448
chr12_9064901_9065403	chr12	9064901	9065403
chr12_10211981_10212483	chr12	10211981	10212483
chr12_10613387_10613889	chr12	10613387	10613889
chr12_12724025_12724527	chr12	12724025	12724527
chr12_12724904_12725406	chr12	12724904	12725406
chr12_12891307_12891809	chr12	12891307	12891809
chr12_12927281_12927783	chr12	12927281	12927783
chr12_13196566_13197068	chr12	13196566	13197068
chr12_14770062_14770564	chr12	14770062	14770564
chr12_14774242_14774744	chr12	14774242	14774744
chr12_14774902_14775404	chr12	14774902	14775404
chr12_19439289_19439791	chr12	19439289	19439791
chr12_22625330_22625832	chr12	22625330	22625832
chr12_25385949_25386451	chr12	25385949	25386451
chr12_26937974_26938476	chr12	26937974	26938476
chr12_27710728_27711230	chr12	27710728	27711230
chr12_30754680_30755182	chr12	30754680	30755182
chr12_30795693_30796195	chr12	30795693	30796195
chr12_30796722_30797224	chr12	30796722	30797224
chr12_32106653_32107155	chr12	32106653	32107155
chr12_32399545_32400047	chr12	32399545	32400047
chr12_32679100_32679602	chr12	32679100	32679602
chr12_32755342_32755844	chr12	32755342	32755844
chr12_38905374_38905876	chr12	38905374	38905876
chr12_39442841_39443343	chr12	39442841	39443343
chr12_42144800_42145302	chr12	42144800	42145302
chr12_42237378_42237880	chr12	42237378	42237880
chr12_42238041_42238543	chr12	42238041	42238543
chr12_45728811_45729313	chr12	45728811	45729313
chr12_45990104_45990606	chr12	45990104	45990606
chr12_46268688_46269190	chr12	46268688	46269190
chr12_46371811_46372313	chr12	46371811	46372313
chr12_47078696_47079198	chr12	47078696	47079198
chr12_47079908_47080410	chr12	47079908	47080410
chr12_47820052_47820554	chr12	47820052	47820554
chr12_47839274_47839776	chr12	47839274	47839776
chr12_48681953_48682455	chr12	48681953	48682455
chr12_48851775_48852277	chr12	48851775	48852277
chr12_48865387_48865889	chr12	48865387	48865889
chr12_48925045_48925547	chr12	48925045	48925547
chr12_48957057_48957559	chr12	48957057	48957559
chr12_48998695_48999197	chr12	48998695	48999197
chr12_48999710_49000212	chr12	48999710	49000212
chr12_49018310_49018812	chr12	49018310	49018812
chr12_49020179_49020681	chr12	49020179	49020681
chr12_49021197_49021699	chr12	49021197	49021699
chr12_49022693_49023195	chr12	49022693	49023195
chr12_49026963_49027465	chr12	49026963	49027465
chr12_49027850_49028352	chr12	49027850	49028352
chr12_49028776_49029278	chr12	49028776	49029278
chr12_49030104_49030606	chr12	49030104	49030606
chr12_49031422_49031924	chr12	49031422	49031924
chr12_49032853_49033355	chr12	49032853	49033355
chr12_49040809_49041311	chr12	49040809	49041311
chr12_49041344_49041846	chr12	49041344	49041846
chr12_49042066_49042568	chr12	49042066	49042568
chr12_49042936_49043438	chr12	49042936	49043438
chr12_49043828_49044330	chr12	49043828	49044330
chr12_49049668_49050170	chr12	49049668	49050170
chr12_49126714_49127216	chr12	49126714	49127216
chr12_49129157_49129659	chr12	49129157	49129659
chr12_49130643_49131145	chr12	49130643	49131145
chr12_49265128_49265630	chr12	49265128	49265630
chr12_49266207_49266709	chr12	49266207	49266709
chr12_49269532_49270034	chr12	49269532	49270034
chr12_49271015_49271517	chr12	49271015	49271517
chr12_49275046_49275548	chr12	49275046	49275548
chr12_49322911_49323413	chr12	49322911	49323413
chr12_49328944_49329446	chr12	49328944	49329446
chr12_49330540_49331042	chr12	49330540	49331042
chr12_49332373_49332875	chr12	49332373	49332875
chr12_49367023_49367525	chr12	49367023	49367525
chr12_49741340_49741842	chr12	49741340	49741842
chr12_49967034_49967536	chr12	49967034	49967536
chr12_50025089_50025591	chr12	50025089	50025591
chr12_50283192_50283694	chr12	50283192	50283694
chr12_50400752_50401254	chr12	50400752	50401254
chr12_51026310_51026812	chr12	51026310	51026812
chr12_51047931_51048433	chr12	51047931	51048433
chr12_51083232_51083734	chr12	51083232	51083734
chr12_51238663_51239165	chr12	51238663	51239165
chr12_52143635_52144137	chr12	52143635	52144137
chr12_52146162_52146664	chr12	52146162	52146664
chr12_52148007_52148509	chr12	52148007	52148509
chr12_52232900_52233402	chr12	52232900	52233402
chr12_52236132_52236634	chr12	52236132	52236634
chr12_52237400_52237902	chr12	52237400	52237902
chr12_52238379_52238881	chr12	52238379	52238881
chr12_52240996_52241498	chr12	52240996	52241498
chr12_52242545_52243047	chr12	52242545	52243047
chr12_52244182_52244684	chr12	52244182	52244684
chr12_52245919_52246421	chr12	52245919	52246421
chr12_52249084_52249586	chr12	52249084	52249586
chr12_52252042_52252544	chr12	52252042	52252544
chr12_52253919_52254421	chr12	52253919	52254421
chr12_52256529_52257031	chr12	52256529	52257031
chr12_52258052_52258554	chr12	52258052	52258554
chr12_52487698_52488200	chr12	52487698	52488200
chr12_52491382_52491884	chr12	52491382	52491884
chr12_52892319_52892821	chr12	52892319	52892821
chr12_52894153_52894655	chr12	52894153	52894655
chr12_52896406_52896908	chr12	52896406	52896908
chr12_52898435_52898937	chr12	52898435	52898937
chr12_52900688_52901190	chr12	52900688	52901190
chr12_52903379_52903881	chr12	52903379	52903881
chr12_52904553_52905055	chr12	52904553	52905055
chr12_52925844_52926346	chr12	52925844	52926346
chr12_52948904_52949406	chr12	52948904	52949406
chr12_52950655_52951157	chr12	52950655	52951157
chr12_52953374_52953876	chr12	52953374	52953876
chr12_53006752_53007254	chr12	53006752	53007254
chr12_53043536_53044038	chr12	53043536	53044038
chr12_53045316_53045818	chr12	53045316	53045818
chr12_53046568_53047070	chr12	53046568	53047070
chr12_53047486_53047988	chr12	53047486	53047988
chr12_53053909_53054411	chr12	53053909	53054411
chr12_53061116_53061618	chr12	53061116	53061618
chr12_53192486_53192988	chr12	53192486	53192988
chr12_53482642_53483144	chr12	53482642	53483144
chr12_53483146_53483648	chr12	53483146	53483648
chr12_53485051_53485553	chr12	53485051	53485553
chr12_53486202_53486704	chr12	53486202	53486704
chr12_53501213_53501715	chr12	53501213	53501715
chr12_53626110_53626612	chr12	53626110	53626612
chr12_53675779_53676281	chr12	53675779	53676281
chr12_54279607_54280109	chr12	54279607	54280109
chr12_54280747_54281249	chr12	54280747	54281249
chr12_54283084_54283586	chr12	54283084	54283586
chr12_54285749_54286251	chr12	54285749	54286251
chr12_54287423_54287925	chr12	54287423	54287925
chr12_55724017_55724519	chr12	55724017	55724519
chr12_56104284_56104786	chr12	56104284	56104786
chr12_56116553_56117055	chr12	56116553	56117055
chr12_56117986_56118488	chr12	56117986	56118488
chr12_56158144_56158646	chr12	56158144	56158646
chr12_56163437_56163939	chr12	56163437	56163939
chr12_56164233_56164735	chr12	56164233	56164735
chr12_56190012_56190514	chr12	56190012	56190514
chr12_56597376_56597878	chr12	56597376	56597878
chr12_56635956_56636458	chr12	56635956	56636458
chr12_56724967_56725469	chr12	56724967	56725469
chr12_57093283_57093785	chr12	57093283	57093785
chr12_57094556_57095058	chr12	57094556	57095058
chr12_57127686_57128188	chr12	57127686	57128188
chr12_57520052_57520554	chr12	57520052	57520554
chr12_57745368_57745870	chr12	57745368	57745870
chr12_57766171_57766673	chr12	57766171	57766673
chr12_62602743_62603245	chr12	62602743	62603245
chr12_63779737_63780239	chr12	63779737	63780239
chr12_64221930_64222432	chr12	64221930	64222432
chr12_64451715_64452217	chr12	64451715	64452217
chr12_65824002_65824504	chr12	65824002	65824504
chr12_65825188_65825690	chr12	65825188	65825690
chr12_65836031_65836533	chr12	65836031	65836533
chr12_65852821_65853323	chr12	65852821	65853323
chr12_65881505_65882007	chr12	65881505	65882007
chr12_65882075_65882577	chr12	65882075	65882577
chr12_68746002_68746504	chr12	68746002	68746504
chr12_68807984_68808486	chr12	68807984	68808486
chr12_69585269_69585771	chr12	69585269	69585771
chr12_75953348_75953850	chr12	75953348	75953850
chr12_76031542_76032044	chr12	76031542	76032044
chr12_76559761_76560263	chr12	76559761	76560263
chr12_79934967_79935469	chr12	79934967	79935469
chr12_82358293_82358795	chr12	82358293	82358795
chr12_88580157_88580659	chr12	88580157	88580659
chr12_89353413_89353915	chr12	89353413	89353915
chr12_92145414_92145916	chr12	92145414	92145916
chr12_93571142_93571644	chr12	93571142	93571644
chr12_96035602_96036104	chr12	96035602	96036104
chr12_98503853_98504355	chr12	98503853	98504355
chr12_98593443_98593945	chr12	98593443	98593945
chr12_103930250_103930752	chr12	103930250	103930752
chr12_104286944_104287446	chr12	104286944	104287446
chr12_104293270_104293772	chr12	104293270	104293772
chr12_104355610_104356112	chr12	104355610	104356112
chr12_104356411_104356913	chr12	104356411	104356913
chr12_104986105_104986607	chr12	104986105	104986607
chr12_105107567_105108069	chr12	105107567	105108069
chr12_105235972_105236474	chr12	105235972	105236474
chr12_108515348_108515850	chr12	108515348	108515850
chr12_108730962_108731464	chr12	108730962	108731464
chr12_108773307_108773809	chr12	108773307	108773809
chr12_109573190_109573692	chr12	109573190	109573692
chr12_110280744_110281246	chr12	110280744	110281246
chr12_110281616_110282118	chr12	110281616	110282118
chr12_110450086_110450588	chr12	110450086	110450588
chr12_110501735_110502237	chr12	110501735	110502237
chr12_111438194_111438696	chr12	111438194	111438696
chr12_111841724_111842226	chr12	111841724	111842226
chr12_112013670_112014172	chr12	112013670	112014172
chr12_112020884_112021386	chr12	112020884	112021386
chr12_112409122_112409624	chr12	112409122	112409624
chr12_112418621_112419123	chr12	112418621	112419123
chr12_113174578_113175080	chr12	113174578	113175080
chr12_113185297_113185799	chr12	113185297	113185799
chr12_114684201_114684703	chr12	114684201	114684703
chr12_114684748_114685250	chr12	114684748	114685250
chr12_116999453_116999955	chr12	116999453	116999955
chr12_117003018_117003520	chr12	117003018	117003520
chr12_117025794_117026296	chr12	117025794	117026296
chr12_117026478_117026980	chr12	117026478	117026980
chr12_117027153_117027655	chr12	117027153	117027655
chr12_117033173_117033675	chr12	117033173	117033675
chr12_117041837_117042339	chr12	117041837	117042339
chr12_120093853_120094355	chr12	120093853	120094355
chr12_120194435_120194937	chr12	120194435	120194937
chr12_120200656_120201158	chr12	120200656	120201158
chr12_120215810_120216312	chr12	120215810	120216312
chr12_120290644_120291146	chr12	120290644	120291146
chr12_120291547_120292049	chr12	120291547	120292049
chr12_120292920_120293422	chr12	120292920	120293422
chr12_120495932_120496434	chr12	120495932	120496434
chr12_120580986_120581488	chr12	120580986	120581488
chr12_120686037_120686539	chr12	120686037	120686539
chr12_120954807_120955309	chr12	120954807	120955309
chr12_120956495_120956997	chr12	120956495	120956997
chr12_120959715_120960217	chr12	120959715	120960217
chr12_120962161_120962663	chr12	120962161	120962663
chr12_120963835_120964337	chr12	120963835	120964337
chr12_120965235_120965737	chr12	120965235	120965737
chr12_120998893_120999395	chr12	120998893	120999395
chr12_121399883_121400385	chr12	121399883	121400385
chr12_122206084_122206586	chr12	122206084	122206586
chr12_122856193_122856695	chr12	122856193	122856695
chr12_122858231_122858733	chr12	122858231	122858733
chr12_122860150_122860652	chr12	122860150	122860652
chr12_122861776_122862278	chr12	122861776	122862278
chr12_122863189_122863691	chr12	122863189	122863691
chr12_122864668_122865170	chr12	122864668	122865170
chr12_122865638_122866140	chr12	122865638	122866140
chr12_122867005_122867507	chr12	122867005	122867507
chr12_122868053_122868555	chr12	122868053	122868555
chr12_122980082_122980584	chr12	122980082	122980584
chr12_123232737_123233239	chr12	123232737	123233239
chr12_123249182_123249684	chr12	123249182	123249684
chr12_124318861_124319363	chr12	124318861	124319363
chr12_124320768_124321270	chr12	124320768	124321270
chr12_124322348_124322850	chr12	124322348	124322850
chr12_124914149_124914651	chr12	124914149	124914651
chr12_124921439_124921941	chr12	124921439	124921941
chr12_124927429_124927931	chr12	124927429	124927931
chr12_124939685_124940187	chr12	124939685	124940187
chr12_124960986_124961488	chr12	124960986	124961488
chr12_130871412_130871914	chr12	130871412	130871914
chr12_130879384_130879886	chr12	130879384	130879886
chr12_131710493_131710995	chr12	131710493	131710995
chr12_131941455_131941957	chr12	131941455	131941957
chr12_131944763_131945265	chr12	131944763	131945265
chr12_132560649_132561151	chr12	132560649	132561151
chr12_132619706_132620208	chr12	132619706	132620208
chr12_132620717_132621219	chr12	132620717	132621219
chr12_132621744_132622246	chr12	132621744	132622246
chr12_132717859_132718361	chr12	132717859	132718361
chr12_132719220_132719722	chr12	132719220	132719722
chr12_132828405_132828907	chr12	132828405	132828907
chr13_19633356_19633858	chr13	19633356	19633858
chr13_19664582_19665084	chr13	19664582	19665084
chr13_19863436_19863938	chr13	19863436	19863938
chr13_19957632_19958134	chr13	19957632	19958134
chr13_19958768_19959270	chr13	19958768	19959270
chr13_20118672_20119174	chr13	20118672	20119174
chr13_20127556_20128058	chr13	20127556	20128058
chr13_20566677_20567179	chr13	20566677	20567179
chr13_20773021_20773523	chr13	20773021	20773523
chr13_20773592_20774094	chr13	20773592	20774094
chr13_21140391_21140893	chr13	21140391	21140893
chr13_21176301_21176803	chr13	21176301	21176803
chr13_21298282_21298784	chr13	21298282	21298784
chr13_21603686_21604188	chr13	21603686	21604188
chr13_24512445_24512947	chr13	24512445	24512947
chr13_26051669_26052171	chr13	26051669	26052171
chr13_26186273_26186775	chr13	26186273	26186775
chr13_26221817_26222319	chr13	26221817	26222319
chr13_27251509_27252011	chr13	27251509	27252011
chr13_27257607_27258109	chr13	27257607	27258109
chr13_27258605_27259107	chr13	27258605	27259107
chr13_27259633_27260135	chr13	27259633	27260135
chr13_27424368_27424870	chr13	27424368	27424870
chr13_27450180_27450682	chr13	27450180	27450682
chr13_28139284_28139786	chr13	28139284	28139786
chr13_28658850_28659352	chr13	28658850	28659352
chr13_29505991_29506493	chr13	29505991	29506493
chr13_29507254_29507756	chr13	29507254	29507756
chr13_29594539_29595041	chr13	29594539	29595041
chr13_29595563_29596065	chr13	29595563	29596065
chr13_29850441_29850943	chr13	29850441	29850943
chr13_30454927_30455429	chr13	30454927	30455429
chr13_30465774_30466276	chr13	30465774	30466276
chr13_30617189_30617691	chr13	30617189	30617691
chr13_30617816_30618318	chr13	30617816	30618318
chr13_30673760_30674262	chr13	30673760	30674262
chr13_30832647_30833149	chr13	30832647	30833149
chr13_31161563_31162065	chr13	31161563	31162065
chr13_33542475_33542977	chr13	33542475	33542977
chr13_34156897_34157399	chr13	34156897	34157399
chr13_36819057_36819559	chr13	36819057	36819559
chr13_36999020_36999522	chr13	36999020	36999522
chr13_37000758_37001260	chr13	37000758	37001260
chr13_38349644_38350146	chr13	38349644	38350146
chr13_39007407_39007909	chr13	39007407	39007909
chr13_39655517_39656019	chr13	39655517	39656019
chr13_41060313_41060815	chr13	41060313	41060815
chr13_41061312_41061814	chr13	41061312	41061814
chr13_41284581_41285083	chr13	41284581	41285083
chr13_41310992_41311494	chr13	41310992	41311494
chr13_42040069_42040571	chr13	42040069	42040571
chr13_42049129_42049631	chr13	42049129	42049631
chr13_44436607_44437109	chr13	44436607	44437109
chr13_44917739_44918241	chr13	44917739	44918241
chr13_45326700_45327202	chr13	45326700	45327202
chr13_45327523_45328025	chr13	45327523	45328025
chr13_45328424_45328926	chr13	45328424	45328926
chr13_45329577_45330079	chr13	45329577	45330079
chr13_45330141_45330643	chr13	45330141	45330643
chr13_45331195_45331697	chr13	45331195	45331697
chr13_45332015_45332517	chr13	45332015	45332517
chr13_45334061_45334563	chr13	45334061	45334563
chr13_45335733_45336235	chr13	45335733	45336235
chr13_45340634_45341136	chr13	45340634	45341136
chr13_45341426_45341928	chr13	45341426	45341928
chr13_46672409_46672911	chr13	46672409	46672911
chr13_48000833_48001335	chr13	48000833	48001335
chr13_48037532_48038034	chr13	48037532	48038034
chr13_48094792_48095294	chr13	48094792	48095294
chr13_48255012_48255514	chr13	48255012	48255514
chr13_48303320_48303822	chr13	48303320	48303822
chr13_48532617_48533119	chr13	48532617	48533119
chr13_48976018_48976520	chr13	48976018	48976520
chr13_49792686_49793188	chr13	49792686	49793188
chr13_49935961_49936463	chr13	49935961	49936463
chr13_49997009_49997511	chr13	49997009	49997511
chr13_50081467_50081969	chr13	50081467	50081969
chr13_50082402_50082904	chr13	50082402	50082904
chr13_50123971_50124473	chr13	50123971	50124473
chr13_50125828_50126330	chr13	50125828	50126330
chr13_51442298_51442800	chr13	51442298	51442800
chr13_51451730_51452232	chr13	51451730	51452232
chr13_51452877_51453379	chr13	51452877	51453379
chr13_51584437_51584939	chr13	51584437	51584939
chr13_51803719_51804221	chr13	51803719	51804221
chr13_52194238_52194740	chr13	52194238	52194740
chr13_52195477_52195979	chr13	52195477	52195979
chr13_52450230_52450732	chr13	52450230	52450732
chr13_52652575_52653077	chr13	52652575	52653077
chr13_60163916_60164418	chr13	60163916	60164418
chr13_60396570_60397072	chr13	60396570	60397072
chr13_73058854_73059356	chr13	73058854	73059356
chr13_73059479_73059981	chr13	73059479	73059981
chr13_73075662_73076164	chr13	73075662	73076164
chr13_73081148_73081650	chr13	73081148	73081650
chr13_75480630_75481132	chr13	75480630	75481132
chr13_75863396_75863898	chr13	75863396	75863898
chr13_76991854_76992356	chr13	76991854	76992356
chr13_77026726_77027228	chr13	77026726	77027228
chr13_77325990_77326492	chr13	77325990	77326492
chr13_79406319_79406821	chr13	79406319	79406821
chr13_79560818_79561320	chr13	79560818	79561320
chr13_91348067_91348569	chr13	91348067	91348569
chr13_94549288_94549790	chr13	94549288	94549790
chr13_94595938_94596440	chr13	94595938	94596440
chr13_94601699_94602201	chr13	94601699	94602201
chr13_96053358_96053860	chr13	96053358	96053860
chr13_97433400_97433902	chr13	97433400	97433902
chr13_97976058_97976560	chr13	97976058	97976560
chr13_98444388_98444890	chr13	98444388	98444890
chr13_98445664_98446166	chr13	98445664	98446166
chr13_99086669_99087171	chr13	99086669	99087171
chr13_99087362_99087864	chr13	99087362	99087864
chr13_99200426_99200928	chr13	99200426	99200928
chr13_99500952_99501454	chr13	99500952	99501454
chr13_99566536_99567038	chr13	99566536	99567038
chr13_99606560_99607062	chr13	99606560	99607062
chr13_100088607_100089109	chr13	100088607	100089109
chr13_100458176_100458678	chr13	100458176	100458678
chr13_102686373_102686875	chr13	102686373	102686875
chr13_102773714_102774216	chr13	102773714	102774216
chr13_102845695_102846197	chr13	102845695	102846197
chr13_106486239_106486741	chr13	106486239	106486741
chr13_106535659_106536161	chr13	106535659	106536161
chr13_106536248_106536750	chr13	106536248	106536750
chr13_106567816_106568318	chr13	106567816	106568318
chr13_106917471_106917973	chr13	106917471	106917973
chr13_108156666_108157168	chr13	108156666	108157168
chr13_108214737_108215239	chr13	108214737	108215239
chr13_109271528_109272030	chr13	109271528	109272030
chr13_109275943_109276445	chr13	109275943	109276445
chr13_110507894_110508396	chr13	110507894	110508396
chr13_110510382_110510884	chr13	110510382	110510884
chr13_110511677_110512179	chr13	110511677	110512179
chr13_110638992_110639494	chr13	110638992	110639494
chr13_110640416_110640918	chr13	110640416	110640918
chr13_110641263_110641765	chr13	110641263	110641765
chr13_110642287_110642789	chr13	110642287	110642789
chr13_110643256_110643758	chr13	110643256	110643758
chr13_110645177_110645679	chr13	110645177	110645679
chr13_110646745_110647247	chr13	110646745	110647247
chr13_110713000_110713502	chr13	110713000	110713502
chr13_110714912_110715414	chr13	110714912	110715414
chr13_110879538_110880040	chr13	110879538	110880040
chr13_110885836_110886338	chr13	110885836	110886338
chr13_110915409_110915911	chr13	110915409	110915911
chr13_111153257_111153759	chr13	111153257	111153759
chr13_112552849_112553351	chr13	112552849	112553351
chr13_112587427_112587929	chr13	112587427	112587929
chr13_112831735_112832237	chr13	112831735	112832237
chr13_112874025_112874527	chr13	112874025	112874527
chr13_112885164_112885666	chr13	112885164	112885666
chr13_112885885_112886387	chr13	112885885	112886387
chr13_112888470_112888972	chr13	112888470	112888972
chr13_112995519_112996021	chr13	112995519	112996021
chr13_113010482_113010984	chr13	113010482	113010984
chr13_113011417_113011919	chr13	113011417	113011919
chr13_113012030_113012532	chr13	113012030	113012532
chr13_113012879_113013381	chr13	113012879	113013381
chr13_113013793_113014295	chr13	113013793	113014295
chr13_113015196_113015698	chr13	113015196	113015698
chr13_113016825_113017327	chr13	113016825	113017327
chr13_113020664_113021166	chr13	113020664	113021166
chr13_113021879_113022381	chr13	113021879	113022381
chr13_113022904_113023406	chr13	113022904	113023406
chr13_113028690_113029192	chr13	113028690	113029192
chr13_113031698_113032200	chr13	113031698	113032200
chr13_113048904_113049406	chr13	113048904	113049406
chr13_113103555_113104057	chr13	113103555	113104057
chr13_113162693_113163195	chr13	113162693	113163195
chr13_113166515_113167017	chr13	113166515	113167017
chr13_113208374_113208876	chr13	113208374	113208876
chr13_113208996_113209498	chr13	113208996	113209498
chr13_113231750_113232252	chr13	113231750	113232252
chr13_113232606_113233108	chr13	113232606	113233108
chr13_113268028_113268530	chr13	113268028	113268530
chr13_113317872_113318374	chr13	113317872	113318374
chr13_113318739_113319241	chr13	113318739	113319241
chr13_113319439_113319941	chr13	113319439	113319941
chr13_113321726_113322228	chr13	113321726	113322228
chr13_113325183_113325685	chr13	113325183	113325685
chr13_113327862_113328364	chr13	113327862	113328364
[truncated: 5,421 more rows]

## Sheet: (B) Intergenic peaks
PeakID	Chr	Start	End
chr6_18836087_18836293	chr6	18836087	18836293
chr13_106917660_106917786	chr13	106917660	106917786
chr7_47254218_47254358	chr7	47254218	47254358
chr2_121075045_121075407	chr2	121075045	121075407
chr14_88978927_88979249	chr14	88978927	88979249
chr15_79744501_79744783	chr15	79744501	79744783
chr9_125409842_125410107	chr9	125409842	125410107
chr1_223532576_223532936	chr1	223532576	223532936
chr1_223534199_223534958	chr1	223534199	223534958
chr3_115784025_115784256	chr3	115784025	115784256
chr11_69948498_69948926	chr11	69948498	69948926
chr22_44865383_44865904	chr22	44865383	44865904
chr19_33905646_33905800	chr19	33905646	33905800
chr9_71670422_71670566	chr9	71670422	71670566
chr9_71675224_71675520	chr9	71675224	71675520
chr2_172196204_172196342	chr2	172196204	172196342
chr2_61764465_61764712	chr2	61764465	61764712
chr2_86018074_86018225	chr2	86018074	86018225
chr8_29660267_29660578	chr8	29660267	29660578
chr1_31154803_31155380	chr1	31154803	31155380
chr1_222464914_222465149	chr1	222464914	222465149
chr8_26661278_26661522	chr8	26661278	26661522
chr22_20589616_20590012	chr22	20589616	20590012
chr8_26659562_26660119	chr8	26659562	26660119
chr10_11451545_11451997	chr10	11451545	11451997
chr2_69306897_69307600	chr2	69306897	69307600
chr13_112888280_112889164	chr13	112888280	112889164
chr12_75953249_75953950	chr12	75953249	75953950
chr11_69985531_69986244	chr11	69985531	69986244
chr2_47079620_47080297	chr2	47079620	47080297
chr6_14210883_14211094	chr6	14210883	14211094
chr14_96577097_96577268	chr14	96577097	96577268
chr13_44917586_44918467	chr13	44917586	44918467
chr7_149355627_149355871	chr7	149355627	149355871
chr18_62393993_62394112	chr18	62393993	62394112
chr18_9543956_9544348	chr18	9543956	9544348
chr18_9542994_9543327	chr18	9542994	9543327
chr11_128454923_128455098	chr11	128454923	128455098
chr18_9541556_9541785	chr18	9541556	9541785
chr6_144216353_144216823	chr6	144216353	144216823
chr18_9540592_9540838	chr18	9540592	9540838
chr11_57823981_57824130	chr11	57823981	57824130
chr11_130221047_130221447	chr11	130221047	130221447
chr19_49218637_49218874	chr19	49218637	49218874
chr11_130219895_130220432	chr11	130219895	130220432
chr1_21591630_21592296	chr1	21591630	21592296
chr17_57685843_57686017	chr17	57685843	57686017
chr11_130218728_130218869	chr11	130218728	130218869
chr1_21592598_21593200	chr1	21592598	21593200
chr16_4183528_4183638	chr16	4183528	4183638
chr1_21593446_21593669	chr1	21593446	21593669
chr13_108156684_108157151	chr13	108156684	108157151
chr11_130216908_130217892	chr11	130216908	130217892
chr1_21594069_21595187	chr1	21594069	21595187
chr9_107341746_107341993	chr9	107341746	107341993
chr15_60340649_60341150	chr15	60340649	60341150
chr18_30985941_30986101	chr18	30985941	30986101
chr8_56017093_56017413	chr8	56017093	56017413
chr15_60342448_60342843	chr15	60342448	60342843
chr15_60343169_60344008	chr15	60343169	60344008
chr18_12035637_12035816	chr18	12035637	12035816
chr10_130190468_130190811	chr10	130190468	130190811
chr11_130213889_130214096	chr11	130213889	130214096
chr10_130189727_130189855	chr10	130189727	130189855
chr18_12034413_12034636	chr18	12034413	12034636
chr12_104356454_104356871	chr12	104356454	104356871
chr15_60345018_60345254	chr15	60345018	60345254
chr17_72395282_72395911	chr17	72395282	72395911
chr10_130188637_130188798	chr10	130188637	130188798
chr12_104355704_104356020	chr12	104355704	104356020
chr22_41021556_41022093	chr22	41021556	41022093
chr17_72394261_72394545	chr17	72394261	72394545
chr22_41022506_41022796	chr22	41022506	41022796
chr17_72393416_72393903	chr17	72393416	72393903
chr6_53495329_53495931	chr6	53495329	53495931
chr17_72391489_72392780	chr17	72391489	72392780
chr13_106486405_106486576	chr13	106486405	106486576
chr21_42830650_42830993	chr21	42830650	42830993
chr16_81713551_81713903	chr16	81713551	81713903
chr12_52143837_52143937	chr12	52143837	52143937
chr18_9961140_9961664	chr18	9961140	9961664
chr15_62390168_62390493	chr15	62390168	62390493
chr21_42831971_42832161	chr21	42831971	42832161
chr9_121789293_121789453	chr9	121789293	121789453
chr21_42832542_42833175	chr21	42832542	42833175
chr17_20996066_20998599	chr17	20996066	20998599
chr21_42833477_42834210	chr21	42833477	42834210
chr19_18988070_18988339	chr19	18988070	18988339
chr12_52144859_52148600	chr12	52144859	52148600
chr3_41244494_41244685	chr3	41244494	41244685
chr6_42090598_42099949	chr6	42090598	42099949
chr11_102391453_102392237	chr11	102391453	102392237
chr21_42834528_42835096	chr21	42834528	42835096
chr3_41241971_41242071	chr3	41241971	41242071
chr20_17609981_17614609	chr20	17609981	17614609
chr2_215354011_215354366	chr2	215354011	215354366
chr21_42836845_42837475	chr21	42836845	42837475
chr6_27091667_27091911	chr6	27091667	27091911
chr17_72383115_72383313	chr17	72383115	72383313
chr7_74133405_74133492	chr7	74133405	74133492
chr21_34785817_34786096	chr21	34785817	34786096
chr20_17608854_17609620	chr20	17608854	17609620
chr17_72381883_72382231	chr17	72381883	72382231
chr18_13765570_13766097	chr18	13765570	13766097
chr6_42089074_42089682	chr6	42089074	42089682
chr11_59556342_59556654	chr11	59556342	59556654
chr3_53217840_53218048	chr3	53217840	53218048
chr6_42088240_42088737	chr6	42088240	42088737
chr11_59557150_59557723	chr11	59557150	59557723
chr2_127043627_127045188	chr2	127043627	127045188
chr17_65524188_65524650	chr17	65524188	65524650
chr11_59551678_59551911	chr11	59551678	59551911
chr8_100913722_100914401	chr8	100913722	100914401
chr6_42086807_42087225	chr6	42086807	42087225
chr9_134441179_134444244	chr9	134441179	134444244
chr3_53219967_53220134	chr3	53219967	53220134
chr2_127045739_127046288	chr2	127045739	127046288
chr11_59550328_59551435	chr11	59550328	59551435
chr9_98018999_98019225	chr9	98018999	98019225
chr3_53220450_53220709	chr3	53220450	53220709
chr8_100914881_100915221	chr8	100914881	100915221
chr1_16120343_16120876	chr1	16120343	16120876
chr6_27096947_27097654	chr6	27096947	27097654
chr21_44766089_44766633	chr21	44766089	44766633
chr3_120313947_120314189	chr3	120313947	120314189
chr18_10560902_10561203	chr18	10560902	10561203
chr21_44766967_44767181	chr21	44766967	44767181
chr11_59560168_59560789	chr11	59560168	59560789
chr3_195955549_195955710	chr3	195955549	195955710
chr8_100916225_100916412	chr8	100916225	100916412
chr17_65527359_65527591	chr17	65527359	65527591
chr3_53222133_53222367	chr3	53222133	53222367
chr18_10558923_10560496	chr18	10558923	10560496
chr7_1425740_1426090	chr7	1425740	1426090
chr18_8642771_8643170	chr18	8642771	8643170
chr1_16122454_16122833	chr1	16122454	16122833
chr19_29845154_29845453	chr19	29845154	29845453
chr1_146409774_146410175	chr1	146409774	146410175
chr2_43006438_43006619	chr2	43006438	43006619
chr7_1426590_1426920	chr7	1426590	1426920
chr6_27726648_27726836	chr6	27726648	27726836
chr18_8641918_8642072	chr18	8641918	8642072
chr8_30776564_30776691	chr8	30776564	30776691
chr3_53223430_53223975	chr3	53223430	53223975
chr18_8641466_8641624	chr18	8641466	8641624
chr6_27280234_27280408	chr6	27280234	27280408
chr22_41413732_41413907	chr22	41413732	41413907
chr11_2204774_2204934	chr11	2204774	2204934
chr1_148302699_148302913	chr1	148302699	148302913
chr7_1427507_1428235	chr7	1427507	1428235
chr18_8640303_8640722	chr18	8640303	8640722
chr1_148303419_148303623	chr1	148303419	148303623
chr11_129862315_129862455	chr11	129862315	129862455
chr1_3485011_3485189	chr1	3485011	3485189
chr19_1316157_1317054	chr19	1316157	1317054
chr17_45020431_45022035	chr17	45020431	45022035
chr11_57294810_57294921	chr11	57294810	57294921
chr14_102056985_102057412	chr14	102056985	102057412
chr11_2202772_2203029	chr11	2202772	2203029
chr7_1428784_1430727	chr7	1428784	1430727
chr13_30832778_30833019	chr13	30832778	30833019
chr10_47969862_47970370	chr10	47969862	47970370
chr6_27177145_27177390	chr6	27177145	27177390
chr1_3483198_3484075	chr1	3483198	3484075
chr1_9617814_9617988	chr1	9617814	9617988
chr11_59565963_59566504	chr11	59565963	59566504
chr8_143910430_143911262	chr8	143910430	143911262
chr1_26500724_26501322	chr1	26500724	26501322
chr7_100798831_100799364	chr7	100798831	100799364
chr17_40470224_40473258	chr17	40470224	40473258
chr19_1314230_1314400	chr19	1314230	1314400
chr1_3482604_3482847	chr1	3482604	3482847
chr16_3171798_3172536	chr16	3171798	3172536
chr17_43360776_43361500	chr17	43360776	43361500
chr9_129150424_129150634	chr9	129150424	129150634
chr3_185909778_185911270	chr3	185909778	185911270
chr6_27275176_27275374	chr6	27275176	27275374
chr1_3481975_3482276	chr1	3481975	3482276
chr8_143911981_143912164	chr8	143911981	143912164
chrX_3816378_3816514	chrX	3816378	3816514
chr2_43074949_43075165	chr2	43074949	43075165
chr3_48399399_48399510	chr3	48399399	48399510
chr3_46909092_46909770	chr3	46909092	46909770
chr19_40662977_40663086	chr19	40662977	40663086
chrX_154347393_154347625	chrX	154347393	154347625
chr17_40473572_40475465	chr17	40473572	40475465
chr6_27720981_27721285	chr6	27720981	27721285
chr6_43798741_43798955	chr6	43798741	43798955
chr7_1431350_1433999	chr7	1431350	1433999
chr8_143912357_143913487	chr8	143912357	143913487
chr19_1779725_1780839	chr19	1779725	1780839
chr2_20197964_20199256	chr2	20197964	20199256
chr3_48398108_48399069	chr3	48398108	48399069
chr7_100800973_100801349	chr7	100800973	100801349
chr17_27319874_27320006	chr17	27319874	27320006
chr3_46667454_46668179	chr3	46667454	46668179
chr8_143913692_143914157	chr8	143913692	143914157
chr8_101179814_101180396	chr8	101179814	101180396
chr20_17937359_17937571	chr20	17937359	17937571
chr20_433478_433578	chr20	433478	433578
chr7_149064935_149066009	chr7	149064935	149066009
chr17_66812176_66812540	chr17	66812176	66812540
chr13_20127729_20127887	chr13	20127729	20127887
chr19_4040216_4040668	chr19	4040216	4040668
chr6_44100128_44102297	chr6	44100128	44102297
chr3_190424761_190424918	chr3	190424761	190424918
chr11_2197898_2198037	chr11	2197898	2198037
chr12_124939411_124940490	chr12	124939411	124940490
chr3_197603498_197603781	chr3	197603498	197603781
chr14_72962823_72963328	chr14	72962823	72963328
chr20_17938760_17939466	chr20	17938760	17939466
chr22_41665011_41665264	chr22	41665011	41665264
chr6_44102570_44102918	chr6	44102570	44102918
chr5_76739301_76739555	chr5	76739301	76739555
chr22_41665532_41666432	chr22	41665532	41666432
chr7_5615400_5615596	chr7	5615400	5615596
chr20_17939908_17940637	chr20	17939908	17940637
chr3_184584208_184584607	chr3	184584208	184584607
chr13_73081288_73081511	chr13	73081288	73081511
chr11_73399106_73399328	chr11	73399106	73399328
chr6_44103982_44104250	chr6	44103982	44104250
chr7_5614617_5614915	chr7	5614617	5614915
chr6_43793850_43793991	chr6	43793850	43793991
chr22_41666702_41667431	chr22	41666702	41667431
chr19_55698358_55698544	chr19	55698358	55698544
chr2_117836249_117836452	chr2	117836249	117836452
chr6_27290537_27290743	chr6	27290537	27290743
chr22_39292518_39292722	chr22	39292518	39292722
chr2_231613879_231614095	chr2	231613879	231614095
chr7_5613665_5614069	chr7	5613665	5614069
chr10_127871900_127872040	chr10	127871900	127872040
chr22_20299235_20299403	chr22	20299235	20299403
chr4_1033141_1033336	chr4	1033141	1033336
chr10_4981680_4985657	chr10	4981680	4985657
chr1_35172788_35173170	chr1	35172788	35173170
chr19_48290974_48291263	chr19	48290974	48291263
chr22_41669065_41669189	chr22	41669065	41669189
chr6_43791502_43792020	chr6	43791502	43792020
chr4_1031993_1032324	chr4	1031993	1032324
chr6_34536468_34536818	chr6	34536468	34536818
chr4_1031380_1031743	chr4	1031380	1031743
chr15_96352239_96352445	chr15	96352239	96352445
chr6_43790851_43791015	chr6	43790851	43791015
chr19_11136590_11137158	chr19	11136590	11137158
chr19_56085509_56085650	chr19	56085509	56085650
chr6_27293772_27294001	chr6	27293772	27294001
chr12_124319048_124319177	chr12	124319048	124319177
chr6_43789565_43790565	chr6	43789565	43790565
chr5_181173345_181174448	chr5	181173345	181174448
chr19_35172791_35173073	chr19	35172791	35173073
chr19_11137674_11138275	chr19	11137674	11138275
chr11_69100753_69101194	chr11	69100753	69101194
chr6_41656168_41656288	chr6	41656168	41656288
chr20_62970102_62970709	chr20	62970102	62970709
chr6_44108500_44108609	chr6	44108500	44108609
chr10_4986216_4986550	chr10	4986216	4986550
chr10_47466257_47467005	chr10	47466257	47467005
chr9_110238892_110239346	chr9	110238892	110239346
chr19_41327838_41327988	chr19	41327838	41327988
chr19_56083823_56084161	chr19	56083823	56084161
chr12_120954963_120955154	chr12	120954963	120955154
chr3_75417834_75417982	chr3	75417834	75417982
chr8_29331659_29332030	chr8	29331659	29332030
chr17_49192084_49192902	chr17	49192084	49192902
chr4_1027467_1031108	chr4	1027467	1031108
chr6_27295220_27295601	chr6	27295220	27295601
chr7_5609401_5609801	chr7	5609401	5609801
chr19_11138647_11139391	chr19	11138647	11139391
chr22_36464853_36464963	chr22	36464853	36464963
chr18_13658069_13658749	chr18	13658069	13658749
chr22_49901506_49902239	chr22	49901506	49902239
chr6_27791199_27791530	chr6	27791199	27791530
chr9_129736469_129736612	chr9	129736469	129736612
chr1_150532038_150532371	chr1	150532038	150532371
chr19_767381_767522	chr19	767381	767522
chr22_36465203_36465416	chr22	36465203	36465416
chr14_20625290_20625576	chr14	20625290	20625576
chr13_20118863_20118985	chr13	20118863	20118985
chr12_124320937_124321103	chr12	124320937	124321103
chr14_90274068_90274192	chr14	90274068	90274192
chr6_27777779_27778024	chr6	27777779	27778024
chr11_1464490_1464984	chr11	1464490	1464984
chr21_17454656_17455095	chr21	17454656	17455095
chr19_41326234_41326605	chr19	41326234	41326605
chr1_156661334_156661587	chr1	156661334	156661587
chr22_25334009_25334339	chr22	25334009	25334339
chr7_5608544_5608829	chr7	5608544	5608829
chr7_76318141_76318424	chr7	76318141	76318424
chr6_43786589_43788774	chr6	43786589	43788774
chr10_5109613_5110463	chr10	5109613	5110463
chr20_363444_363587	chr20	363444	363587
chr12_120956618_120956876	chr12	120956618	120956876
chr7_44771350_44771726	chr7	44771350	44771726
chr14_105005440_105006146	chr14	105005440	105006146
chr19_766037_766615	chr19	766037	766615
chr2_177227759_177228108	chr2	177227759	177228108
chr22_41431725_41431975	chr22	41431725	41431975
chr9_110240613_110242445	chr9	110240613	110242445
chr11_69654039_69658331	chr11	69654039	69658331
chr5_181169915_181170084	chr5	181169915	181170084
chr7_44215933_44216135	chr7	44215933	44216135
chr1_146036924_146037701	chr1	146036924	146037701
chr17_39753017_39756503	chr17	39753017	39756503
chr6_27162186_27162407	chr6	27162186	27162407
chr12_124322474_124322726	chr12	124322474	124322726
chr19_56081053_56081538	chr19	56081053	56081538
chr11_76806211_76806439	chr11	76806211	76806439
chr16_3158682_3159038	chr16	3158682	3159038
chr2_85313646_85313830	chr2	85313646	85313830
chr11_74452242_74453769	chr11	74452242	74453769
chr5_136064773_136067359	chr5	136064773	136067359
chr1_151979592_151979854	chr1	151979592	151979854
chr7_16790509_16790709	chr7	16790509	16790709
chr11_83086434_83086652	chr11	83086434	83086652
chr11_67989279_67990103	chr11	67989279	67990103
chr20_58017753_58018870	chr20	58017753	58018870
chr19_48483348_48483864	chr19	48483348	48483864
chr16_39256_39526	chr16	39256	39526
chr1_146037873_146038143	chr1	146037873	146038143
chr6_43035501_43036130	chr6	43035501	43036130
chr2_177226769_177227090	chr2	177226769	177227090
chr6_27297880_27298277	chr6	27297880	27298277
chr6_28104829_28104984	chr6	28104829	28104984
chr11_2256802_2256992	chr11	2256802	2256992
chr19_5889923_5890321	chr19	5889923	5890321
chr11_76805082_76805879	chr11	76805082	76805879
chr11_68257944_68258629	chr11	68257944	68258629
chr19_11141955_11142332	chr19	11141955	11142332
chr17_48023529_48023733	chr17	48023529	48023733
chr15_75215268_75215585	chr15	75215268	75215585
chr15_75215856_75216698	chr15	75215856	75216698
chrX_154006459_154006898	chrX	154006459	154006898
chr16_3157253_3157656	chr16	3157253	3157656
chr6_43034330_43034901	chr6	43034330	43034901
chr1_146038874_146039753	chr1	146038874	146039753
chr2_177225280_177225961	chr2	177225280	177225961
chr14_105503998_105504240	chr14	105503998	105504240
chr19_11142683_11143551	chr19	11142683	11143551
chr7_44561671_44562093	chr7	44561671	44562093
chr11_76804201_76804577	chr11	76804201	76804577
chr14_103541645_103541963	chr14	103541645	103541963
chr12_120959680_120959787	chr12	120959680	120959787
chr11_68259229_68259703	chr11	68259229	68259703
chr11_2258303_2258534	chr11	2258303	2258534
chr12_52892294_52892847	chr12	52892294	52892847
chr10_43383579_43384648	chr10	43383579	43384648
chr22_43164121_43164511	chr22	43164121	43164511
chr12_124927141_124928346	chr12	124927141	124928346
chr19_46772525_46772970	chr19	46772525	46772970
chrX_154007690_154007897	chrX	154007690	154007897
chr12_120960124_120960274	chr12	120960124	120960274
chr11_69094571_69095960	chr11	69094571	69095960
chr14_105502411_105503644	chr14	105502411	105503644
chr7_531875_532168	chr7	531875	532168
chr17_19732881_19734918	chr17	19732881	19734918
chr2_240636613_240636926	chr2	240636613	240636926
chr11_83083202_83083684	chr11	83083202	83083684
chr4_74455960_74456806	chr4	74455960	74456806
chr11_76802739_76803289	chr11	76802739	76803289
chr22_19032829_19034898	chr22	19032829	19034898
chr11_2259633_2259792	chr11	2259633	2259792
chr14_20630371_20630636	chr14	20630371	20630636
chr7_44563193_44563529	chr7	44563193	44563529
chr17_39749635_39752633	chr17	39749635	39752633
chr1_19262888_19263074	chr1	19262888	19263074
chr21_44443467_44444952	chr21	44443467	44444952
chr17_81723159_81723376	chr17	81723159	81723376
chr6_167815729_167815949	chr6	167815729	167815949
chr5_2740507_2741003	chr5	2740507	2741003
chr13_113647052_113647568	chr13	113647052	113647568
chr16_74307510_74307765	chr16	74307510	74307765
chr20_58014568_58014693	chr20	58014568	58014693
chr1_146387256_146387733	chr1	146387256	146387733
chr19_45478587_45478774	chr19	45478587	45478774
chr12_52894191_52894618	chr12	52894191	52894618
chr6_27157958_27158321	chr6	27157958	27158321
chr14_20631080_20631323	chr14	20631080	20631323
chr2_240635366_240636065	chr2	240635366	240636065
chr14_105501386_105501872	chr14	105501386	105501872
chr11_83082322_83082479	chr11	83082322	83082479
chr20_642945_643167	chr20	642945	643167
chr12_49272758_49277837	chr12	49272758	49277837
chr1_149712527_149712717	chr1	149712527	149712717
chr16_87823967_87824813	chr16	87823967	87824813
chr6_27334745_27335169	chr6	27334745	27335169
chr17_81722029_81722743	chr17	81722029	81722743
chr8_37705763_37705939	chr8	37705763	37705939
chr11_2260762_2261001	chr11	2260762	2261001
chr5_136070291_136070805	chr5	136070291	136070805
chr17_81537087_81539470	chr17	81537087	81539470
chr12_120962107_120962718	chr12	120962107	120962718
chr14_37585154_37585459	chr14	37585154	37585459
chr1_161540041_161540542	chr1	161540041	161540542
chr20_49290407_49290559	chr20	49290407	49290559
chr1_159913790_159914090	chr1	159913790	159914090
chr17_29064690_29067018	chr17	29064690	29067018
chr17_50363358_50363597	chr17	50363358	50363597
chr11_76801147_76801803	chr11	76801147	76801803
chr14_22967310_22967758	chr14	22967310	22967758
chr14_103538011_103539697	chr14	103538011	103539697
chr1_8856861_8857264	chr1	8856861	8857264
chr14_105500522_105501022	chr14	105500522	105501022
chr13_45326832_45327071	chr13	45326832	45327071
chr6_27902436_27903278	chr6	27902436	27903278
chr4_82420478_82421166	chr4	82420478	82421166
chr11_62890542_62891521	chr11	62890542	62891521
chr14_68784394_68784939	chr14	68784394	68784939
chr1_234600073_234600487	chr1	234600073	234600487
chr7_44805342_44806373	chr7	44805342	44806373
chr4_52722122_52722776	chr4	52722122	52722776
chr3_52047023_52047496	chr3	52047023	52047496
chr17_28753075_28753242	chr17	28753075	28753242
chr13_30455082_30455276	chr13	30455082	30455276
chr19_38798268_38798444	chr19	38798268	38798444
chr17_50363903_50364433	chr17	50363903	50364433
chr1_16904777_16905233	chr1	16904777	16905233
chr11_2261775_2262124	chr11	2261775	2262124
chr11_1265429_1265763	chr11	1265429	1265763
chr1_143720477_143720738	chr1	143720477	143720738
chr22_36277810_36278093	chr22	36277810	36278093
chr21_43767187_43767724	chr21	43767187	43767724
chr19_45877016_45877553	chr19	45877016	45877553
chr1_148353344_148353981	chr1	148353344	148353981
chr11_76800361_76800758	chr11	76800361	76800758
chr1_27001713_27003275	chr1	27001713	27003275
chr8_37704379_37704638	chr8	37704379	37704638
chr13_45327317_45328233	chr13	45327317	45328233
chr2_216507300_216507534	chr2	216507300	216507534
chr7_130868026_130868433	chr7	130868026	130868433
chr17_28752357_28752770	chr17	28752357	28752770
chr11_62890197_62890307	chr11	62890197	62890307
chr14_20632887_20633411	chr14	20632887	20633411
chr7_22864936_22865297	chr7	22864936	22865297
chr16_3152482_3153094	chr16	3152482	3153094
chr5_136071928_136072315	chr5	136071928	136072315
chr17_50759024_50759240	chr17	50759024	50759240
chr6_27303678_27303940	chr6	27303678	27303940
chr3_40465576_40465783	chr3	40465576	40465783
chr6_27332906_27333127	chr6	27332906	27333127
chr12_120963541_120964633	chr12	120963541	120964633
chr22_49970740_49971228	chr22	49970740	49971228
chr19_45877791_45878408	chr19	45877791	45878408
chr1_27400635_27400762	chr1	27400635	27400762
chr14_100285077_100285736	chr14	100285077	100285736
chr10_47991557_47991947	chr10	47991557	47991947
chr22_30257691_30258076	chr22	30257691	30258076
chr17_29067280_29068119	chr17	29067280	29068119
chr10_32893567_32893674	chr10	32893567	32893674
chr6_26576994_26577280	chr6	26576994	26577280
chr16_87826787_87826963	chr16	87826787	87826963
chr21_43768090_43769091	chr21	43768090	43769091
chr1_152029204_152029317	chr1	152029204	152029317
chr7_44804160_44804658	chr7	44804160	44804658
chr13_45328579_45328772	chr13	45328579	45328772
chr1_202017698_202018910	chr1	202017698	202018910
chr15_74403604_74403839	chr15	74403604	74403839
chr8_73285422_73286458	chr8	73285422	73286458
chr12_130879307_130879964	chr12	130879307	130879964
chr22_28792535_28793328	chr22	28792535	28793328
chr11_2262540_2264170	chr11	2262540	2264170
chr11_33693091_33693205	chr11	33693091	33693205
chr17_41696216_41696583	chr17	41696216	41696583
chr14_68785223_68787599	chr14	68785223	68787599
chr11_76798978_76799460	chr11	76798978	76799460
chr17_79830975_79833033	chr17	79830975	79833033
chr1_26479687_26479938	chr1	26479687	26479938
chr1_201461445_201462185	chr1	201461445	201462185
chr19_49632502_49633114	chr19	49632502	49633114
chr19_33309983_33310163	chr19	33309983	33310163
chr2_240631990_240632760	chr2	240631990	240632760
chr17_76271854_76272780	chr17	76271854	76272780
chr9_136937514_136937915	chr9	136937514	136937915
chr9_136110932_136111882	chr9	136110932	136111882
chr1_16727178_16727716	chr1	16727178	16727716
chr8_37702631_37702776	chr8	37702631	37702776
chr5_150442698_150442914	chr5	150442698	150442914
chr2_43218944_43220400	chr2	43218944	43220400
chr17_81676566_81677158	chr17	81676566	81677158
chr12_120965046_120965928	chr12	120965046	120965928
chr2_3581915_3582073	chr2	3581915	3582073
chr21_43769453_43769844	chr21	43769453	43769844
chr1_161612658_161612840	chr1	161612658	161612840
chr1_145287547_145288010	chr1	145287547	145288010
chr1_144419042_144419413	chr1	144419042	144419413
chr1_120844105_120844574	chr1	120844105	120844574
chr11_62553572_62553827	chr11	62553572	62553827
chr6_37176555_37176927	chr6	37176555	37176927
chr19_45685237_45685561	chr19	45685237	45685561
chr19_17814877_17815086	chr19	17814877	17815086
chr3_50260700_50260869	chr3	50260700	50260869
chr20_38418581_38419069	chr20	38418581	38419069
chr17_81506268_81506417	chr17	81506268	81506417
chr5_136073730_136074561	chr5	136073730	136074561
chr1_30929089_30929626	chr1	30929089	30929626
chr6_26575517_26575938	chr6	26575517	26575938
chr1_149708602_149708818	chr1	149708602	149708818
chr22_41933273_41934458	chr22	41933273	41934458
chr11_2264523_2264758	chr11	2264523	2264758
chr1_161530172_161531344	chr1	161530172	161531344
chr12_124921355_124922060	chr12	124921355	124922060
chr9_33801361_33802046	chr9	33801361	33802046
chr22_40038089_40038831	chr22	40038089	40038831
chr13_45329190_45331598	chr13	45329190	45331598
chr22_39526323_39527287	chr22	39526323	39527287
chr19_55222470_55224131	chr19	55222470	55224131
chrX_153800044_153800889	chrX	153800044	153800889
chr6_28212842_28213232	chr6	28212842	28213232
chr6_73511851_73513284	chr6	73511851	73513284
chr2_231449958_231450175	chr2	231449958	231450175
chr9_136112415_136112726	chr9	136112415	136112726
chr17_8138861_8139858	chr17	8138861	8139858
chr9_137296512_137296649	chr9	137296512	137296649
chr1_20480465_20480734	chr1	20480465	20480734
chr15_40328571_40330791	chr15	40328571	40330791
chr17_81506677_81507728	chr17	81506677	81507728
chr19_48760985_48761281	chr19	48760985	48761281
chr17_59846387_59847150	chr17	59846387	59847150
chr11_67588947_67589247	chr11	67588947	67589247
chr11_133892997_133893247	chr11	133892997	133893247
chr17_75774393_75774578	chr17	75774393	75774578
chr20_63526019_63526260	chr20	63526019	63526260
chr6_41603599_41604621	chr6	41603599	41604621
chr13_113268230_113268330	chr13	113268230	113268330
chr2_43221037_43221483	chr2	43221037	43221483
chr1_1236143_1239043	chr1	1236143	1239043
chr5_136075139_136075575	chr5	136075139	136075575
chr3_51990393_51991040	chr3	51990393	51991040
chr7_2531878_2532608	chr7	2531878	2532608
chr3_39416042_39416333	chr3	39416042	39416333
chr17_29068985_29072001	chr17	29068985	29072001
chr22_39527580_39527965	chr22	39527580	39527965
chr19_39430268_39431633	chr19	39430268	39431633
chr9_33800510_33800690	chr9	33800510	33800690
chr19_55604653_55606070	chr19	55604653	55606070
chr19_19510524_19510838	chr19	19510524	19510838
chr22_39525066_39525846	chr22	39525066	39525846
chr14_103517915_103518060	chr14	103517915	103518060
chr17_75774672_75775565	chr17	75774672	75775565
chr11_123053167_123053560	chr11	123053167	123053560
chr16_783096_784166	chr16	783096	784166
chr11_2265844_2266565	chr11	2265844	2266565
chr15_74406614_74406914	chr15	74406614	74406914
chr22_21625118_21625723	chr22	21625118	21625723
chr7_100568016_100570521	chr7	100568016	100570521
chr19_17866750_17867460	chr19	17866750	17867460
chr13_27259742_27260027	chr13	27259742	27260027
chr22_21657045_21658479	chr22	21657045	21658479
chr17_59845578_59845802	chr17	59845578	59845802
chr19_33297527_33298785	chr19	33297527	33298785
chr1_995667_995875	chr1	995667	995875
chr8_142735591_142740440	chr8	142735591	142740440
chr17_82239565_82242535	chr17	82239565	82242535
chr11_65448452_65449152	chr11	65448452	65449152
chr1_1069839_1070125	chr1	1069839	1070125
chr16_774368_774604	chr16	774368	774604
chr5_181218143_181218542	chr5	181218143	181218542
chr16_3491014_3491307	chr16	3491014	3491307
chr8_123211516_123211717	chr8	123211516	123211717
chr6_1316419_1316942	chr6	1316419	1316942
chr7_73437774_73438210	chr7	73437774	73438210
chr13_45332046_45332488	chr13	45332046	45332488
chrX_154383225_154383549	chrX	154383225	154383549
chr1_1370841_1371282	chr1	1370841	1371282
chr20_63524763_63524953	chr20	63524763	63524953
chr17_38847388_38847706	chr17	38847388	38847706
chr6_73513748_73515006	chr6	73513748	73515006
chr9_83965694_83965899	chr9	83965694	83965899
chr7_130872551_130873012	chr7	130872551	130873012
chr7_2530492_2531640	chr7	2530492	2531640
chr9_137446003_137446249	chr9	137446003	137446249
chr14_105480988_105481405	chr14	105480988	105481405
chr19_55225250_55225383	chr19	55225250	55225383
chr11_62556259_62556713	chr11	62556259	62556713
chr19_1442064_1442270	chr19	1442064	1442270
chr15_74407363_74408016	chr15	74407363	74408016
chr19_41872465_41874268	chr19	41872465	41874268
chr14_90513391_90513640	chr14	90513391	90513640
chr8_100699269_100699412	chr8	100699269	100699412
chr6_132820472_132821236	chr6	132820472	132821236
chr2_84908974_84909567	chr2	84908974	84909567
chr8_143276770_143279401	chr8	143276770	143279401
chrX_154382710_154382991	chrX	154382710	154382991
chr19_55398738_55399399	chr19	55398738	55399399
chr11_85682454_85682961	chr11	85682454	85682961
chr5_181187453_181189253	chr5	181187453	181189253
chr3_39414406_39414708	chr3	39414406	39414708
chr13_27258777_27258937	chr13	27258777	27258937
chrX_12978464_12978629	chrX	12978464	12978629
chr6_1315694_1316016	chr6	1315694	1316016
chr20_63524012_63524265	chr20	63524012	63524265
chr5_136076290_136078222	chr5	136076290	136078222
chr19_17865288_17866479	chr19	17865288	17866479
chr22_46116486_46117265	chr22	46116486	46117265
chr22_39522703_39524802	chr22	39522703	39524802
chr17_81242792_81243396	chr17	81242792	81243396
chr19_2479050_2479498	chr19	2479050	2479498
chr22_39309224_39312346	chr22	39309224	39312346
chr8_123212762_123212989	chr8	123212762	123212989
chr7_148966214_148966361	chr7	148966214	148966361
chrX_45743081_45743578	chrX	45743081	45743578
chr22_49964376_49967182	chr22	49964376	49967182
chr1_153532756_153534311	chr1	153532756	153534311
chr6_132819601_132820014	chr6	132819601	132820014
chr17_59842475_59845229	chr17	59842475	59845229
chr13_27257627_27258091	chr13	27257627	27258091
chr7_130874383_130874573	chr7	130874383	130874573
chr22_46115715_46116104	chr22	46115715	46116104
chr9_127445698_127447553	chr9	127445698	127447553
chr22_20128231_20128551	chr22	20128231	20128551
chr1_209433963_209434152	chr1	209433963	209434152
chr2_231713635_231716743	chr2	231713635	231716743
chr14_53946049_53947208	chr14	53946049	53947208
chr4_151105428_151105910	chr4	151105428	151105910
chr17_43232051_43232236	chr17	43232051	43232236
chr19_17864090_17864672	chr19	17864090	17864672
chr22_46115221_46115456	chr22	46115221	46115456
chr14_34548040_34548419	chr14	34548040	34548419
chr19_58385354_58385583	chr19	58385354	58385583
chr1_1168163_1172487	chr1	1168163	1172487
chr16_802560_802913	chr16	802560	802913
chr9_136950069_136950550	chr9	136950069	136950550
chr5_181206606_181208007	chr5	181206606	181208007
chr6_26594757_26595038	chr6	26594757	26595038
chr7_1461220_1461818	chr7	1461220	1461818
chr2_10120326_10120676	chr2	10120326	10120676
chr11_68753525_68753650	chr11	68753525	68753650
chr17_38867635_38867930	chr17	38867635	38867930
chr19_40446354_40446617	chr19	40446354	40446617
chr10_13302133_13302377	chr10	13302133	13302377
chr22_50272163_50272908	chr22	50272163	50272908
chr17_41519327_41523000	chr17	41519327	41523000
chr17_44326957_44327078	chr17	44326957	44327078
chr11_18410036_18410253	chr11	18410036	18410253
chr14_104721896_104722120	chr14	104721896	104722120
chr16_89156963_89157093	chr16	89156963	89157093
chr8_22111101_22112197	chr8	22111101	22112197
chr1_1782142_1782655	chr1	1782142	1782655
chr16_31199455_31199720	chr16	31199455	31199720
chr20_16575638_16575893	chr20	16575638	16575893
chr2_95294691_95295291	chr2	95294691	95295291
chr2_73983798_73984306	chr2	73983798	73984306
chr22_41928784_41929557	chr22	41928784	41929557
chr19_13838950_13839124	chr19	13838950	13839124
chr17_81515121_81515238	chr17	81515121	81515238
chr17_50132174_50132387	chr17	50132174	50132387
chr22_20128870_20129985	chr22	20128870	20129985
chr16_586402_587461	chr16	586402	587461
chr1_203859080_203859225	chr1	203859080	203859225
chr20_63858674_63858877	chr20	63858674	63858877
chr14_20681440_20682010	chr14	20681440	20682010
chr17_39153353_39154866	chr17	39153353	39154866
chr19_42244907_42245217	chr19	42244907	42245217
chr3_113699127_113699227	chr3	113699127	113699227
chr19_35639117_35639280	chr19	35639117	35639280
chr22_25383912_25384336	chr22	25383912	25384336
chr1_234611959_234612192	chr1	234611959	234612192
chr17_41789099_41789580	chr17	41789099	41789580
chr2_10138581_10139016	chr2	10138581	10139016
chr17_79926405_79932265	chr17	79926405	79932265
chr11_2425460_2425859	chr11	2425460	2425859
chr7_44067996_44068473	chr7	44067996	44068473
chr6_53547650_53548096	chr6	53547650	53548096
chr17_7046579_7046785	chr17	7046579	7046785
chr9_136949361_136949750	chr9	136949361	136949750
chr2_240565696_240565861	chr2	240565696	240565861
chr14_99274438_99274623	chr14	99274438	99274623
chrX_18674829_18675123	chrX	18674829	18675123
chr7_73827912_73828060	chr7	73827912	73828060
chr1_156146053_156147965	chr1	156146053	156147965
chr1_16545818_16546120	chr1	16545818	16546120
chr11_815701_816148	chr11	815701	816148
chr1_15435288_15435628	chr1	15435288	15435628
chr1_16678080_16678440	chr1	16678080	16678440
chr7_958263_958557	chr7	958263	958557
chr7_100370259_100370622	chr7	100370259	100370622
chr9_35756805_35757761	chr9	35756805	35757761
chr19_586718_587035	chr19	586718	587035
chr6_42197916_42198119	chr6	42197916	42198119
chr18_12944869_12944969	chr18	12944869	12944969
chr19_1266034_1266274	chr19	1266034	1266274
chr1_6183220_6183329	chr1	6183220	6183329
chr1_206006538_206006705	chr1	206006538	206006705
chr17_41643186_41643529	chr17	41643186	41643529
chr20_63857500_63858419	chr20	63857500	63858419
chr17_48585780_48585969	chr17	48585780	48585969
chr22_21649608_21649714	chr22	21649608	21649714
chr10_43420551_43420999	chr10	43420551	43420999
chr17_39733842_39733973	chr17	39733842	39733973
chr17_41790089_41790216	chr17	41790089	41790216
chr19_39403093_39403705	chr19	39403093	39403705
chr11_67314216_67314522	chr11	67314216	67314522
chr11_1830713_1830948	chr11	1830713	1830948
chr8_22112594_22113268	chr8	22112594	22113268
chr14_104861703_104861875	chr14	104861703	104861875
chr2_95293479_95294068	chr2	95293479	95294068
chr1_156637898_156638744	chr1	156637898	156638744
chr16_89913892_89914578	chr16	89913892	89914578
chr17_81707899_81709160	chr17	81707899	81709160
chr1_6183765_6183939	chr1	6183765	6183939
chr9_127608292_127608597	chr9	127608292	127608597
chr17_42548398_42549105	chr17	42548398	42549105
chr2_39124015_39124531	chr2	39124015	39124531
chr7_23474078_23474338	chr7	23474078	23474338
chr19_13840236_13840755	chr19	13840236	13840755
chr11_2426837_2426972	chr11	2426837	2426972
chr19_36107026_36107621	chr19	36107026	36107621
chr11_72678217_72678499	chr11	72678217	72678499
chr19_42246119_42246941	chr19	42246119	42246941
chr1_2416055_2417021	chr1	2416055	2417021
chr9_114398310_114398486	chr9	114398310	114398486
chr1_153553025_153553645	chr1	153553025	153553645
chr19_996018_996645	chr19	996018	996645
chr9_136882172_136882637	chr9	136882172	136882637
chr1_1162068_1163917	chr1	1162068	1163917
chr11_67411498_67411629	chr11	67411498	67411629
chr20_63856974_63857179	chr20	63856974	63857179
chr19_48707945_48708064	chr19	48707945	48708064
chr17_1460366_1460595	chr17	1460366	1460595
chr8_144143157_144144363	chr8	144143157	144144363
chr2_231052123_231053021	chr2	231052123	231053021
chr19_39402443_39402578	chr19	39402443	39402578
chr7_134544611_134544867	chr7	134544611	134544867
chr19_41791875_41792588	chr19	41791875	41792588
chr12_49966716_49967856	chr12	49966716	49967856
chr2_10136032_10137985	chr2	10136032	10137985
chr17_81517075_81517295	chr17	81517075	81517295
chr19_5676067_5676550	chr19	5676067	5676550
chr7_1463658_1464203	chr7	1463658	1464203
chr22_46081465_46081565	chr22	46081465	46081565
chr7_100368108_100369686	chr7	100368108	100369686
chr19_44804384_44804543	chr19	44804384	44804543
chr22_21661228_21661543	chr22	21661228	21661543
chr22_29301723_29303006	chr22	29301723	29303006
chr17_78226265_78227030	chr17	78226265	78227030
chr17_57992868_57993091	chr17	57992868	57993091
chr22_40039599_40040496	chr22	40039599	40040496
chr19_584888_585185	chr19	584888	585185
chr17_19753138_19753440	chr17	19753138	19753440
chr14_58239759_58240103	chr14	58239759	58240103
chr3_52299098_52299276	chr3	52299098	52299276
chr19_13841281_13841815	chr19	13841281	13841815
chr12_131944949_131945080	chr12	131944949	131945080
chr9_128697460_128697713	chr9	128697460	128697713
chr22_41931591_41931879	chr22	41931591	41931879
chr2_219274148_219274650	chr2	219274148	219274650
chr19_48708502_48709048	chr19	48708502	48709048
chr17_41739449_41739727	chr17	41739449	41739727
chr1_11052070_11052343	chr1	11052070	11052343
chr19_39401761_39401939	chr19	39401761	39401939
chr20_63856039_63856326	chr20	63856039	63856326
chr20_16743180_16743438	chr20	16743180	16743438
chr3_197034778_197034993	chr3	197034778	197034993
chr1_228635523_228635730	chr1	228635523	228635730
chr17_1461141_1461648	chr17	1461141	1461648
chr1_156144430_156145198	chr1	156144430	156145198
chr7_134543717_134544195	chr7	134543717	134544195
chr1_2417430_2418054	chr1	2417430	2418054
chr19_1444888_1445042	chr19	1444888	1445042
chr17_41645331_41645445	chr17	41645331	41645445
chr17_44753317_44754653	chr17	44753317	44754653
chr9_124512574_124512674	chr9	124512574	124512674
chr11_68455422_68455536	chr11	68455422	68455536
chr10_46392780_46393463	chr10	46392780	46393463
chr19_1748263_1748502	chr19	1748263	1748502
chr9_95091158_95091619	chr9	95091158	95091619
chr2_61475849_61476183	chr2	61475849	61476183
chr6_26532765_26533285	chr6	26532765	26533285
chr17_41792067_41792223	chr17	41792067	41792223
chr1_1161608_1161796	chr1	1161608	1161796
chr19_45607558_45607705	chr19	45607558	45607705
chr3_52299578_52299957	chr3	52299578	52299957
chr17_42546619_42547438	chr17	42546619	42547438
chr8_134832260_134832727	chr8	134832260	134832727
chr1_228076886_228077217	chr1	228076886	228077217
chr22_37193803_37194039	chr22	37193803	37194039
chr13_79560987_79561153	chr13	79560987	79561153
chr22_38761579_38761778	chr22	38761579	38761778
chr19_13842059_13842585	chr19	13842059	13842585
chr6_27478488_27479098	chr6	27478488	27479098
chr1_1079476_1080513	chr1	1079476	1080513
chr19_35931312_35931515	chr19	35931312	35931515
chr22_41932259_41932801	chr22	41932259	41932801
chr6_27688092_27688550	chr6	27688092	27688550
chr5_139336028_139336179	chr5	139336028	139336179
chr12_8026911_8027138	chr12	8026911	8027138
chr11_64885331_64885625	chr11	64885331	64885625
chr20_63855301_63855576	chr20	63855301	63855576
chr11_68454758_68455086	chr11	68454758	68455086
chr7_134543205_134543390	chr7	134543205	134543390
chr17_78985757_78985870	chr17	78985757	78985870
chr17_41645953_41646176	chr17	41645953	41646176
chr9_136880528_136880680	chr9	136880528	136880680
chr15_41487814_41488016	chr15	41487814	41488016
chr17_81518426_81519214	chr17	81518426	81519214
chr19_44802626_44803403	chr19	44802626	44803403
chr2_231050626_231050915	chr2	231050626	231050915
chr22_30252722_30253246	chr22	30252722	30253246
chr20_62380779_62381019	chr20	62380779	62381019
chr22_17171360_17171552	chr22	17171360	17171552
chr1_2418533_2419022	chr1	2418533	2419022
chr19_43605763_43606007	chr19	43605763	43606007
chr17_81840979_81841603	chr17	81840979	81841603
chr3_58176838_58176978	chr3	58176838	58176978
chr16_88537249_88537587	chr16	88537249	88537587
chr11_67259862_67260198	chr11	67259862	67260198
chr17_41792685_41793613	chr17	41792685	41793613
chr1_156143114_156144005	chr1	156143114	156144005
chr11_68454271_68454394	chr11	68454271	68454394
chr1_143735757_143736172	chr1	143735757	143736172
chr19_34475384_34475775	chr19	34475384	34475775
chr16_50260069_50260204	chr16	50260069	50260204
chr6_27479397_27479874	chr6	27479397	27479874
chr4_1864736_1864981	chr4	1864736	1864981
chr4_1862649_1862939	chr4	1862649	1862939
chr22_41595439_41597584	chr22	41595439	41597584
chr1_1160227_1160654	chr1	1160227	1160654
chr16_2905029_2905491	chr16	2905029	2905491
chr1_155072058_155072184	chr1	155072058	155072184
chr10_80524241_80524682	chr10	80524241	80524682
chr19_44994488_44994815	chr19	44994488	44994815
chr7_1466000_1466602	chr7	1466000	1466602
chr1_167714407_167715713	chr1	167714407	167715713
chr17_78986785_78987030	chr17	78986785	78987030
chr17_17244045_17244203	chr17	17244045	17244203
chr9_137060891_137061085	chr9	137060891	137061085
chr3_42539336_42539749	chr3	42539336	42539749
chr17_81841876_81842098	chr17	81841876	81842098
chr17_81519650_81519847	chr17	81519650	81519847
chr7_962150_962635	chr7	962150	962635
chr1_228075050_228076253	chr1	228075050	228076253
chr11_65326428_65326877	chr11	65326428	65326877
chr17_57995351_57995558	chr17	57995351	57995558
chr9_127795535_127795796	chr9	127795535	127795796
chr15_41486530_41486773	chr15	41486530	41486773
chr17_47687850_47688097	chr17	47687850	47688097
chr6_44238753_44238903	chr6	44238753	44238903
chr20_775849_776019	chr20	775849	776019
chr1_155071107_155071588	chr1	155071107	155071588
chr19_55216750_55217010	chr19	55216750	55217010
chr13_75863573_75863723	chr13	75863573	75863723
chr11_72681636_72682099	chr11	72681636	72682099
chr1_25239640_25240267	chr1	25239640	25240267
chr3_58177814_58178371	chr3	58177814	58178371
chr22_46078358_46078664	chr22	46078358	46078664
chr1_1123481_1124226	chr1	1123481	1124226
chr17_41742072_41742345	chr17	41742072	41742345
chr14_105028530_105028856	chr14	105028530	105028856
chr7_128783213_128783734	chr7	128783213	128783734
chr20_62672693_62675941	chr20	62672693	62675941
chr9_95093679_95093915	chr9	95093679	95093915
chr17_44922599_44924065	chr17	44922599	44924065
chr17_41647476_41648833	chr17	41647476	41648833
chr17_78987374_78988655	chr17	78987374	78988655
chr5_177481694_177481989	chr5	177481694	177481989
chr1_150479076_150479295	chr1	150479076	150479295
chr17_14016256_14016361	chr17	14016256	14016361
chr14_105085856_105086005	chr14	105085856	105086005
chr9_127794096_127795148	chr9	127794096	127795148
chr6_44237363_44238329	chr6	44237363	44238329
chr7_963232_964235	chr7	963232	964235
chr1_156141043_156142124	chr1	156141043	156142124
chr1_183149523_183149746	chr1	183149523	183149746
chr6_27753161_27753562	chr6	27753161	27753562
chr16_88538533_88540543	chr16	88538533	88540543
chr20_399322_399481	chr20	399322	399481
chr3_58179034_58179651	chr3	58179034	58179651
chr19_43763447_43764047	chr19	43763447	43764047
chr19_50485148_50485777	chr19	50485148	50485777
chr2_227804982_227805178	chr2	227804982	227805178
chr1_1157669_1158802	chr1	1157669	1158802
chr1_153649698_153649821	chr1	153649698	153649821
chr14_104855586_104857028	chr14	104855586	104857028
chr9_94166562_94167289	chr9	94166562	94167289
chr9_93567301_93567816	chr9	93567301	93567816
chr7_155952073_155952186	chr7	155952073	155952186
chr19_39187581_39187998	chr19	39187581	39187998
chr17_41743759_41744014	chr17	41743759	41744014
chr6_27684406_27684871	chr6	27684406	27684871
chrX_154524914_154526458	chrX	154524914	154526458
chr20_43657314_43657762	chr20	43657314	43657762
chr1_228072428_228073687	chr1	228072428	228073687
chr19_43764380_43764919	chr19	43764380	43764919
chr7_1520912_1521245	chr7	1520912	1521245
chr1_204506178_204507240	chr1	204506178	204507240
chr11_71433039_71433168	chr11	71433039	71433168
chr9_94166012_94166268	chr9	94166012	94166268
chr17_41649562_41650492	chr17	41649562	41650492
chr17_31549828_31550416	chr17	31549828	31550416
chr11_128953126_128953506	chr11	128953126	128953506
chr21_29002658_29003103	chr21	29002658	29003103
chr1_1156969_1157294	chr1	1156969	1157294
chr22_42867237_42867568	chr22	42867237	42867568
chr6_27237451_27237707	chr6	27237451	27237707
chr17_41678582_41678859	chr17	41678582	41678859
chr17_41744802_41744989	chr17	41744802	41744989
chr16_3193859_3194085	chr16	3193859	3194085
chrX_70434377_70434737	chrX	70434377	70434737
chr13_99566537_99567039	chr13	99566537	99567039
chr8_119257113_119257353	chr8	119257113	119257353
chr1_153647999_153648322	chr1	153647999	153648322
chr3_49880566_49880883	chr3	49880566	49880883
chr3_149367202_149367343	chr3	149367202	149367343
chr20_53593585_53593725	chr20	53593585	53593725
chr17_82076364_82076699	chr17	82076364	82076699
chr5_860830_862623	chr5	860830	862623
chr19_50487131_50487898	chr19	50487131	50487898
chr22_37199015_37199439	chr22	37199015	37199439
chr20_6747007_6747266	chr20	6747007	6747266
chr19_13847505_13847834	chr19	13847505	13847834
chr17_41650864_41651646	chr17	41650864	41651646
chrX_154526753_154527854	chrX	154526753	154527854
chr14_104853566_104854300	chr14	104853566	104854300
chr14_20652925_20653282	chr14	20652925	20653282
chr3_49881120_49882151	chr3	49881120	49882151
chr22_49948908_49949156	chr22	49948908	49949156
chr19_39185120_39185546	chr19	39185120	39185546
chr17_41798359_41798768	chr17	41798359	41798768
chr1_200916755_200917419	chr1	200916755	200917419
chr17_41651896_41652253	chr17	41651896	41652253
chr17_41676652_41677245	chr17	41676652	41677245
chr11_63962392_63962800	chr11	63962392	63962800
chr15_78860467_78860928	chr15	78860467	78860928
chr11_70190782_70191160	chr11	70190782	70191160
chr9_135919348_135919607	chr9	135919348	135919607
chr16_3191331_3192189	chr16	3191331	3192189
chr6_44087056_44087230	chr6	44087056	44087230
chr11_76769692_76769835	chr11	76769692	76769835
chr6_34224095_34224382	chr6	34224095	34224382
chr20_63484956_63485592	chr20	63484956	63485592
chr1_226135238_226135546	chr1	226135238	226135546
chr17_41799010_41799836	chr17	41799010	41799836
chr6_26556377_26556876	chr6	26556377	26556876
chr17_19731010_19732544	chr17	19731010	19732544
chr7_73591481_73591602	chr7	73591481	73591602
chr19_50489343_50489980	chr19	50489343	50489980
chr14_104852270_104852440	chr14	104852270	104852440
chr7_101141275_101141483	chr7	101141275	101141483
chr17_21227291_21228142	chr17	21227291	21228142
chr7_41680704_41680853	chr7	41680704	41680853
chr11_63961051_63961678	chr11	63961051	63961678
chr17_41745240_41750618	chr17	41745240	41750618
chr9_135920098_135920825	chr9	135920098	135920825
chr8_66112972_66114300	chr8	66112972	66114300
chr7_2665549_2666468	chr7	2665549	2666468
chr11_68298697_68299343	chr11	68298697	68299343
chr1_16872427_16872832	chr1	16872427	16872832
chr1_226134155_226134547	chr1	226134155	226134547
chr8_22010036_22010829	chr8	22010036	22010829
chr19_3210419_3211060	chr19	3210419	3211060
chr1_146035385_146036211	chr1	146035385	146036211
chr11_128957198_128957583	chr11	128957198	128957583
chr6_26555202_26555460	chr6	26555202	26555460
chr22_38287015_38287399	chr22	38287015	38287399
chr6_26299544_26299822	chr6	26299544	26299822
chr3_49884003_49884885	chr3	49884003	49884885
chr17_60135544_60135706	chr17	60135544	60135706
chr16_3189412_3189874	chr16	3189412	3189874
chr9_135921403_135922269	chr9	135921403	135922269
chr5_74625261_74625409	chr5	74625261	74625409
chr7_66100069_66100169	chr7	66100069	66100169
chr16_56947052_56947304	chr16	56947052	56947304
chr10_132430230_132430468	chr10	132430230	132430468
chr6_43702630_43702750	chr6	43702630	43702750
chr16_89642692_89642970	chr16	89642692	89642970
chr1_248873514_248874575	chr1	248873514	248874575
chr17_41653702_41656757	chr17	41653702	41656757
chr8_28401309_28401697	chr8	28401309	28401697
chr7_17359744_17359996	chr7	17359744	17359996
chr3_49885241_49885683	chr3	49885241	49885683
chr22_40651798_40652377	chr22	40651798	40652377
chr6_26553333_26554350	chr6	26553333	26554350
chr9_92206591_92206715	chr9	92206591	92206715
chr17_68019655_68020421	chr17	68019655	68020421
chr10_132429357_132429773	chr10	132429357	132429773
chr16_57299721_57300893	chr16	57299721	57300893
chr17_43315547_43316230	chr17	43315547	43316230
chr19_50492163_50492715	chr19	50492163	50492715
chr7_100523378_100523537	chr7	100523378	100523537
chr6_44090456_44090586	chr6	44090456	44090586
chr17_21230521_21230744	chr17	21230521	21230744
chr16_85705104_85705264	chr16	85705104	85705264
chr16_14285754_14286376	chr16	14285754	14286376
chr19_41912171_41912511	chr19	41912171	41912511
chr17_43316523_43317045	chr17	43316523	43317045
chr1_148263316_148263963	chr1	148263316	148263963
chr13_39007568_39007749	chr13	39007568	39007749
chr17_41657016_41657355	chr17	41657016	41657355
chr20_41317101_41317380	chr20	41317101	41317380
chr17_73278893_73279187	chr17	73278893	73279187
chr6_27230382_27230727	chr6	27230382	27230727
chr19_33176707_33177830	chr19	33176707	33177830
chr17_41750944_41753368	chr17	41750944	41753368
chr17_41657657_41657790	chr17	41657657	41657790
chr2_20242733_20243455	chr2	20242733	20243455
chr20_41317732_41317881	chr20	41317732	41317881
chr19_41910108_41911758	chr19	41910108	41911758
chr2_42810191_42811067	chr2	42810191	42811067
chr1_148264897_148265303	chr1	148264897	148265303
chr17_21232584_21232914	chr17	21232584	21232914
chr17_73279855_73280270	chr17	73279855	73280270
chr22_19873294_19873463	chr22	19873294	19873463
chr2_241577528_241577697	chr2	241577528	241577697
chr14_20609176_20609548	chr14	20609176	20609548
chr6_44093129_44093478	chr6	44093129	44093478
chr17_41658843_41659365	chr17	41658843	41659365
chr14_105200184_105200356	chr14	105200184	105200356
chr19_37293736_37293913	chr19	37293736	37293913
chr19_41909464_41909691	chr19	41909464	41909691
chr22_19874155_19874397	chr22	19874155	19874397
chr14_20609992_20610351	chr14	20609992	20610351
chr1_61057796_61057994	chr1	61057796	61057994
chr9_98728420_98728736	chr9	98728420	98728736
chr10_22229195_22229688	chr10	22229195	22229688
chr12_47839353_47839698	chr12	47839353	47839698
chr13_29507426_29507586	chr13	29507426	29507586
chr6_44094286_44094589	chr6	44094286	44094589
chr19_41735548_41735750	chr19	41735548	41735750
chr11_65982005_65982305	chr11	65982005	65982305
chr6_26305288_26305638	chr6	26305288	26305638
chr16_3184112_3184377	chr16	3184112	3184377
chr19_41908598_41908814	chr19	41908598	41908814
chr10_5546512_5546752	chr10	5546512	5546752
chr7_17354213_17354763	chr7	17354213	17354763
chr5_173766669_173767055	chr5	173766669	173767055
chr14_20662925_20663476	chr14	20662925	20663476
chr14_105202262_105202555	chr14	105202262	105202555
chr6_44095206_44096905	chr6	44095206	44096905
chr16_3182595_3182944	chr16	3182595	3182944
chr2_237464809_237464957	chr2	237464809	237464957
chr6_27672071_27672566	chr6	27672071	27672566
chr5_136007056_136007192	chr5	136007056	136007192
chr8_123156650_123157722	chr8	123156650	123157722
chr17_77504740_77504840	chr17	77504740	77504840
chr7_149647031_149647155	chr7	149647031	149647155
chr10_32980503_32980871	chr10	32980503	32980871
chr6_27495494_27496091	chr6	27495494	27496091
chr17_41665055_41667283	chr17	41665055	41667283
chr17_77504189_77504337	chr17	77504189	77504337
chr14_20613252_20613956	chr14	20613252	20613956
chr9_40951997_40952219	chr9	40951997	40952219
chrX_45770135_45770361	chrX	45770135	45770361
chr6_27670444_27670730	chr6	27670444	27670730
chr10_3808713_3808934	chr10	3808713	3808934
chr16_3180478_3180687	chr16	3180478	3180687
chr7_149690913_149691451	chr7	149690913	149691451
chr17_77502919_77503221	chr17	77502919	77503221
chr10_6120673_6120972	chr10	6120673	6120972
chr2_84946477_84946744	chr2	84946477	84946744
chr1_161480436_161480757	chr1	161480436	161480757
chr20_57645181_57645736	chr20	57645181	57645736
chr17_82494195_82495094	chr17	82494195	82495094
chr1_226122539_226122729	chr1	226122539	226122729
chr1_149558356_149558494	chr1	149558356	149558494
chr6_27668524_27668719	chr6	27668524	27668719
chr7_55214386_55214490	chr7	55214386	55214490
chr17_19507637_19508327	chr17	19507637	19508327
chr16_28089156_28089884	chr16	28089156	28089884
chr6_26311596_26311941	chr6	26311596	26311941
chr8_60652145_60652597	chr8	60652145	60652597
chr14_104898170_104898275	chr14	104898170	104898275
chr20_57646605_57648071	chr20	57646605	57648071
chr1_156456579_156457032	chr1	156456579	156457032
chr7_157309610_157309700	chr7	157309610	157309700
chr11_76233806_76234048	chr11	76233806	76234048
chr6_26312465_26313379	chr6	26312465	26313379
chr13_113556986_113557472	chr13	113556986	113557472
chr8_143906036_143906167	chr8	143906036	143906167
chr21_44845670_44846079	chr21	44845670	44846079
chr16_3175469_3175976	chr16	3175469	3175976
chr11_76234649_76236430	chr11	76234649	76236430
chr1_174022204_174022660	chr1	174022204	174022660
chr1_159141491_159141811	chr1	159141491	159141811
chr6_27502946_27503178	chr6	27502946	27503178
chr15_100849553_100849806	chr15	100849553	100849806
chr2_127388145_127388373	chr2	127388145	127388373
chr11_68151484_68152033	chr11	68151484	68152033
chr4_185112287_185112709	chr4	185112287	185112709
chr6_28474493_28474784	chr6	28474493	28474784
chr6_43738263_43738549	chr6	43738263	43738549
chr1_161399496_161400119	chr1	161399496	161400119
chr2_26140743_26141391	chr2	26140743	26141391
chr18_12781858_12781965	chr18	12781858	12781965
chr19_1322404_1322511	chr19	1322404	1322511
chr8_123819299_123819507	chr8	123819299	123819507
chr6_27214941_27215285	chr6	27214941	27215285
chr6_27505605_27506053	chr6	27505605	27506053
chr11_75207985_75208144	chr11	75207985	75208144
chr19_1321834_1322119	chr19	1321834	1322119
chr16_84786717_84787031	chr16	84786717	84787031
chr11_129316291_129316429	chr11	129316291	129316429
chr11_75207543_75207750	chr11	75207543	75207750
chr15_26082175_26082557	chr15	26082175	26082557
chr6_26319059_26319252	chr6	26319059	26319252
chr6_26331322_26331616	chr6	26331322	26331616
chr6_27213796_27214020	chr6	27213796	27214020
chr11_46243240_46243404	chr11	46243240	46243404
chr2_156400351_156401338	chr2	156400351	156401338
chr6_26330166_26330461	chr6	26330166	26330461
chr9_98020561_98020820	chr9	98020561	98020820
chr7_74417697_74417857	chr7	74417697	74417857
chr1_28775324_28775659	chr1	28775324	28775659
chr6_26327995_26328333	chr6	26327995	26328333
chr15_92609358_92609533	chr15	92609358	92609533
chr6_26322682_26323206	chr6	26322682	26323206
chr6_26327464_26327755	chr6	26327464	26327755
chr1_180117175_180117325	chr1	180117175	180117325
chr6_27209758_27209941	chr6	27209758	27209941
chr1_27528320_27528492	chr1	27528320	27528492
chr9_122331601_122331901	chr9	122331601	122331901
chr9_127224555_127224832	chr9	127224555	127224832
chr1_148522238_148523100	chr1	148522238	148523100
chr13_30673782_30674205	chr13	30673782	30674205
chr7_4642231_4642402	chr7	4642231	4642402
chr2_172513403_172513738	chr2	172513403	172513738
chr2_231666266_231666870	chr2	231666266	231666870
chr12_108773511_108773607	chr12	108773511	108773607
chr7_74410597_74411038	chr7	74410597	74411038
chr6_27650798_27651113	chr6	27650798	27651113
chr1_226353042_226353333	chr1	226353042	226353333
chr18_31207188_31207305	chr18	31207188	31207305
chr2_3170692_3171059	chr2	3170692	3171059
chr17_77958245_77958638	chr17	77958245	77958638
chr1_148529080_148529542	chr1	148529080	148529542
chr12_117033090_117033759	chr12	117033090	117033759
chr6_27519241_27519626	chr6	27519241	27519626
chr21_14027354_14027709	chr21	14027354	14027709
chr9_72257920_72258227	chr9	72257920	72258227
chr2_54675923_54676217	chr2	54675923	54676217
chr21_42829433_42829722	chr21	42829433	42829722
chr7_44376728_44377116	chr7	44376728	44377116
chr6_41450703_41450882	chr6	41450703	41450882
chr6_41449903_41450351	chr6	41449903	41450351
chr1_161421904_161422416	chr1	161421904	161422416
chr18_12038332_12038688	chr18	12038332	12038688
chr3_31648613_31648745	chr3	31648613	31648745
chr6_27532109_27532352	chr6	27532109	27532352
chr1_145465386_145465923	chr1	145465386	145465923
chr1_161427866_161428462	chr1	161427866	161428462
chr6_27631276_27631593	chr6	27631276	27631593
chr3_98966960_98967258	chr3	98966960	98967258
chr11_68617948_68618708	chr11	68617948	68618708
chr11_68617271_68617654	chr11	68617271	68617654
chr15_83378955_83379799	chr15	83378955	83379799
chr10_67764279_67764665	chr10	67764279	67764665
chr6_27541663_27541966	chr6	27541663	27541966
chr6_27545463_27546001	chr6	27545463	27546001
chr6_41427913_41428035	chr6	41427913	41428035
chr6_27547550_27547959	chr6	27547550	27547959
chr21_14055823_14056247	chr21	14055823	14056247
chr3_138834728_138835221	chr3	138834728	138835221
chr6_27618099_27618573	chr6	27618099	27618573
chr17_50944228_50944573	chr17	50944228	50944573
chr16_48462016_48462267	chr16	48462016	48462267
chr21_14059088_14059409	chr21	14059088	14059409
chr6_27553316_27553650	chr6	27553316	27553650
chr1_94622932_94623751	chr1	94622932	94623751
chr21_14063004_14063236	chr21	14063004	14063236
chr6_26743231_26743476	chr6	26743231	26743476
chr3_132231660_132232022	chr3	132231660	132232022
chr12_32399728_32399866	chr12	32399728	32399866
chr18_13130115_13132147	chr18	13130115	13132147
chr17_47067500_47067608	chr17	47067500	47067608
chr6_27605449_27605885	chr6	27605449	27605885
chr6_26749787_26750068	chr6	26749787	26750068
chr21_14070232_14071287	chr21	14070232	14071287
chr18_13127109_13127584	chr18	13127109	13127584
chr6_27602441_27602768	chr6	27602441	27602768
chr21_14071792_14072502	chr21	14071792	14072502
chr21_14072802_14073082	chr21	14072802	14073082
chr21_14073698_14074037	chr21	14073698	14074037
chr6_26756453_26756704	chr6	26756453	26756704
chr10_790097_790259	chr10	790097	790259
chr6_27592524_27593082	chr6	27592524	27593082
chr10_791665_791964	chr10	791665	791964
chr6_27591687_27592053	chr6	27591687	27592053
chr6_27576000_27576284	chr6	27576000	27576284
chr13_109271688_109271871	chr13	109271688	109271871
chr13_109275660_109276729	chr13	109275660	109276729
chr6_27583333_27583586	chr6	27583333	27583586
chr10_802453_802862	chr10	802453	802862
chr10_803423_803624	chr10	803423	803624
chr12_25386039_25386363	chr12	25386039	25386363
chr18_8963539_8963657	chr18	8963539	8963657
chr13_34157006_34157291	chr13	34157006	34157291
chr21_15486541_15486764	chr21	15486541	15486764
chr6_38166676_38166871	chr6	38166676	38166871
chr3_174441037_174441194	chr3	174441037	174441194
