# Supplementary figures and images for: eRNA profiling uncovers the enhancer landscape of oesophageal adenocarcinoma and reveals new deregulated pathways
Source: eLife journal article supplement (doi:10.7554/elife.80840), 2023-02-20

**A**

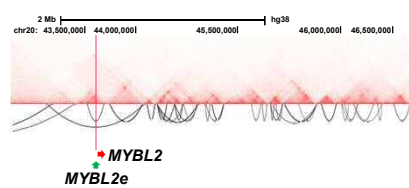

**B**

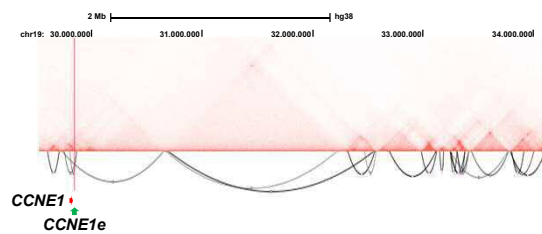

**C**

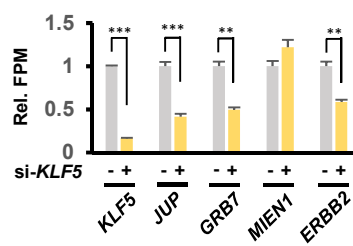

Supplement: supp [file elife-80840-supp-v1.zip]

**A**

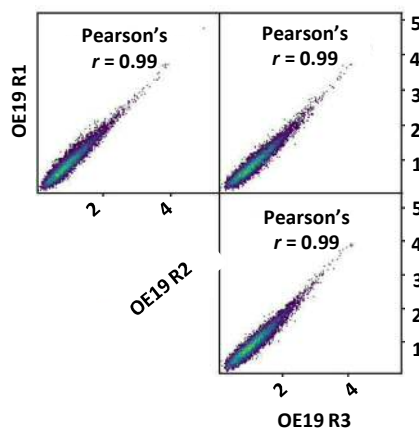

**B**

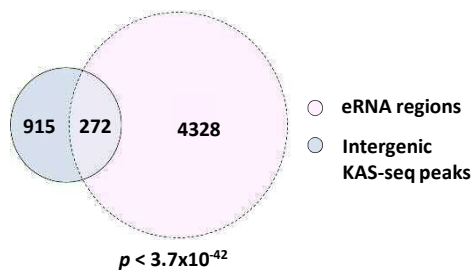

**C**

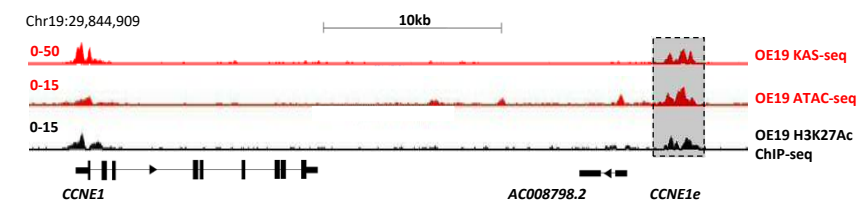

**D**

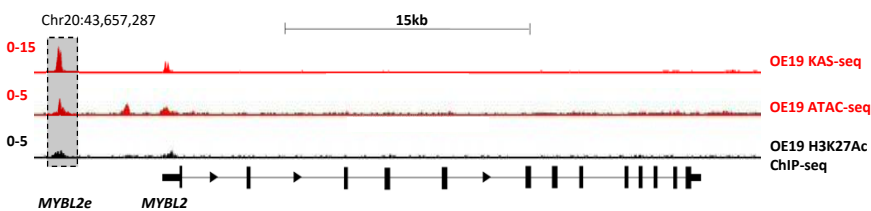

**E**

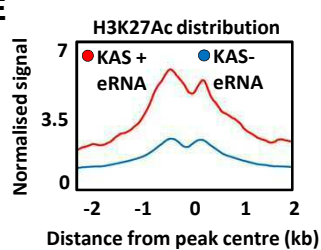

Supplement: supp [file elife-80840-supp-v1.zip]

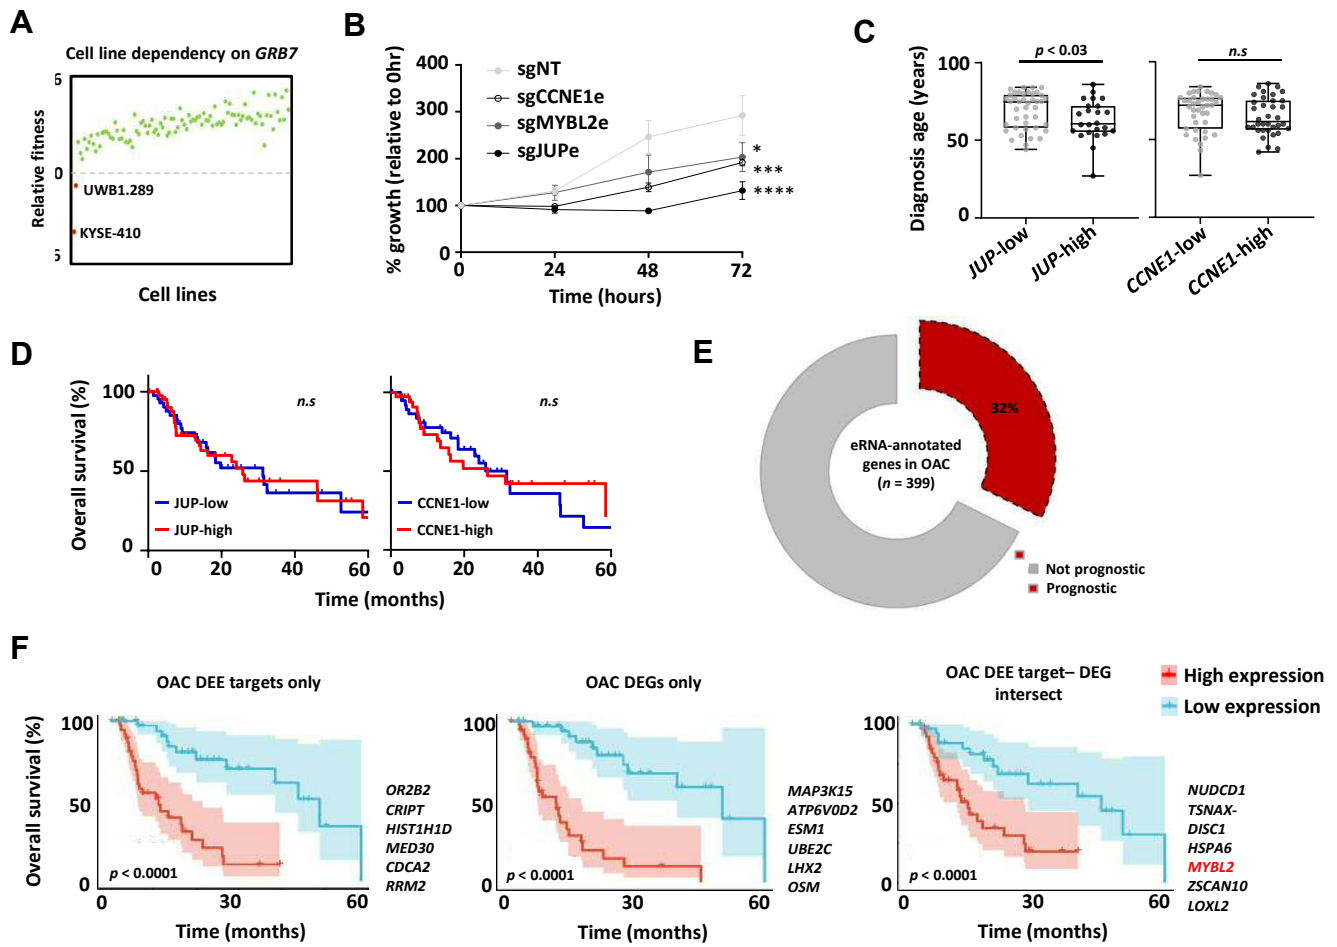

Supplement: supp [file elife-80840-supp-v1.zip]

**A**

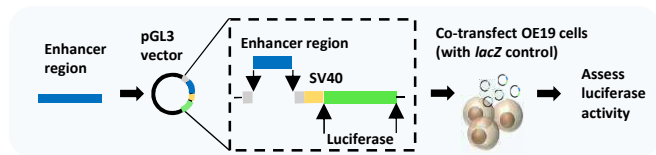

**B**

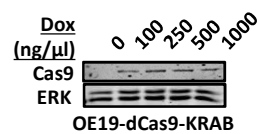

**C**

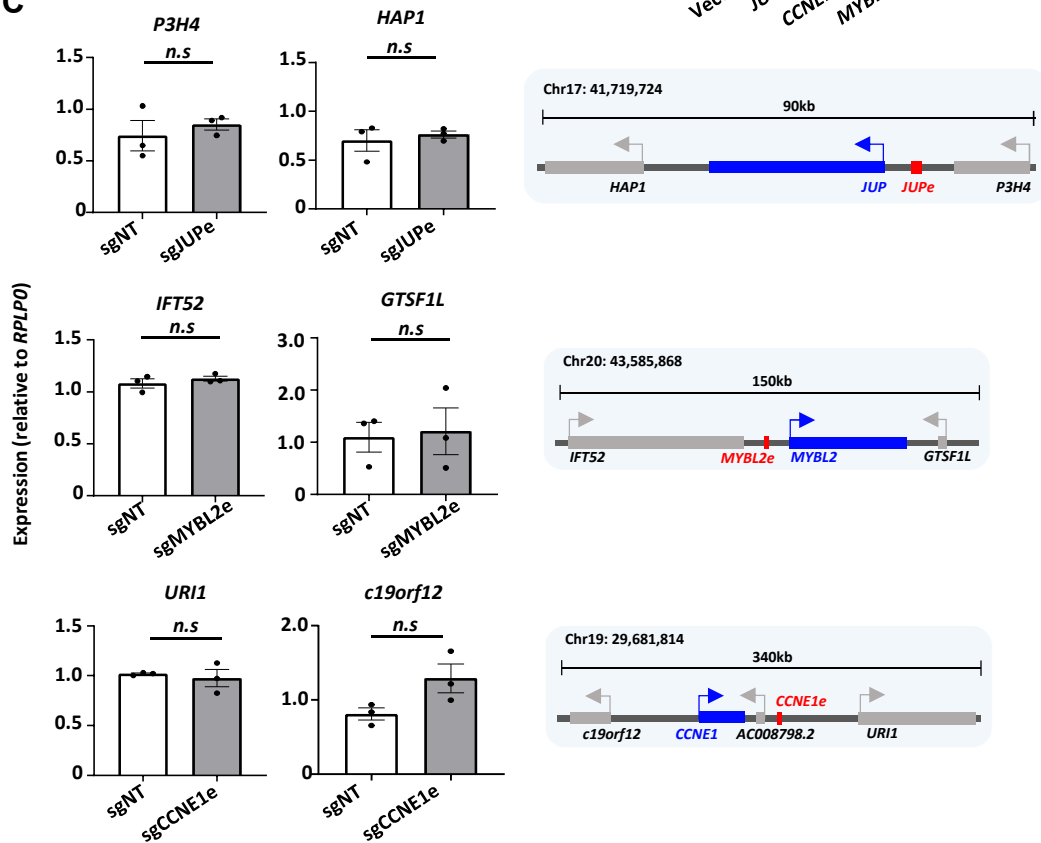

Supplement: supp [file elife-80840-supp-v1.zip]

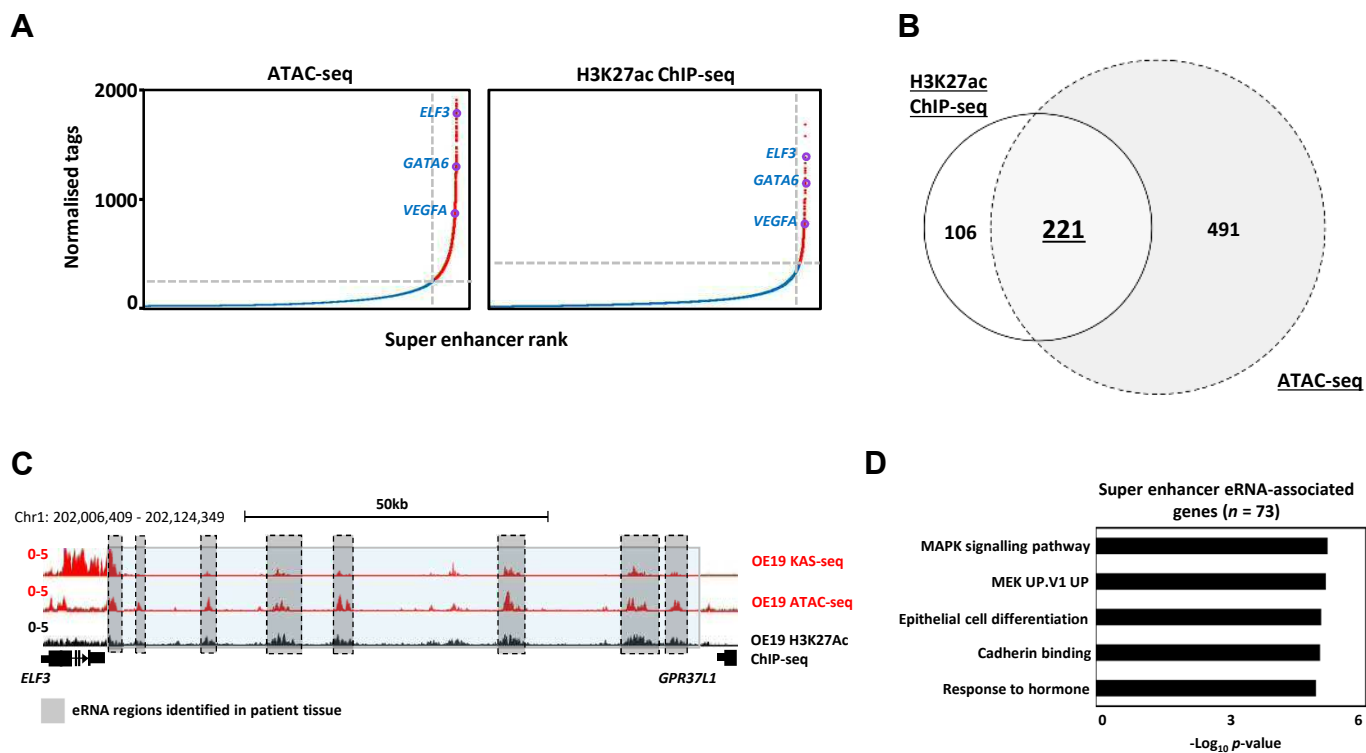

Supplement: supp [file elife-80840-supp-v1.zip]

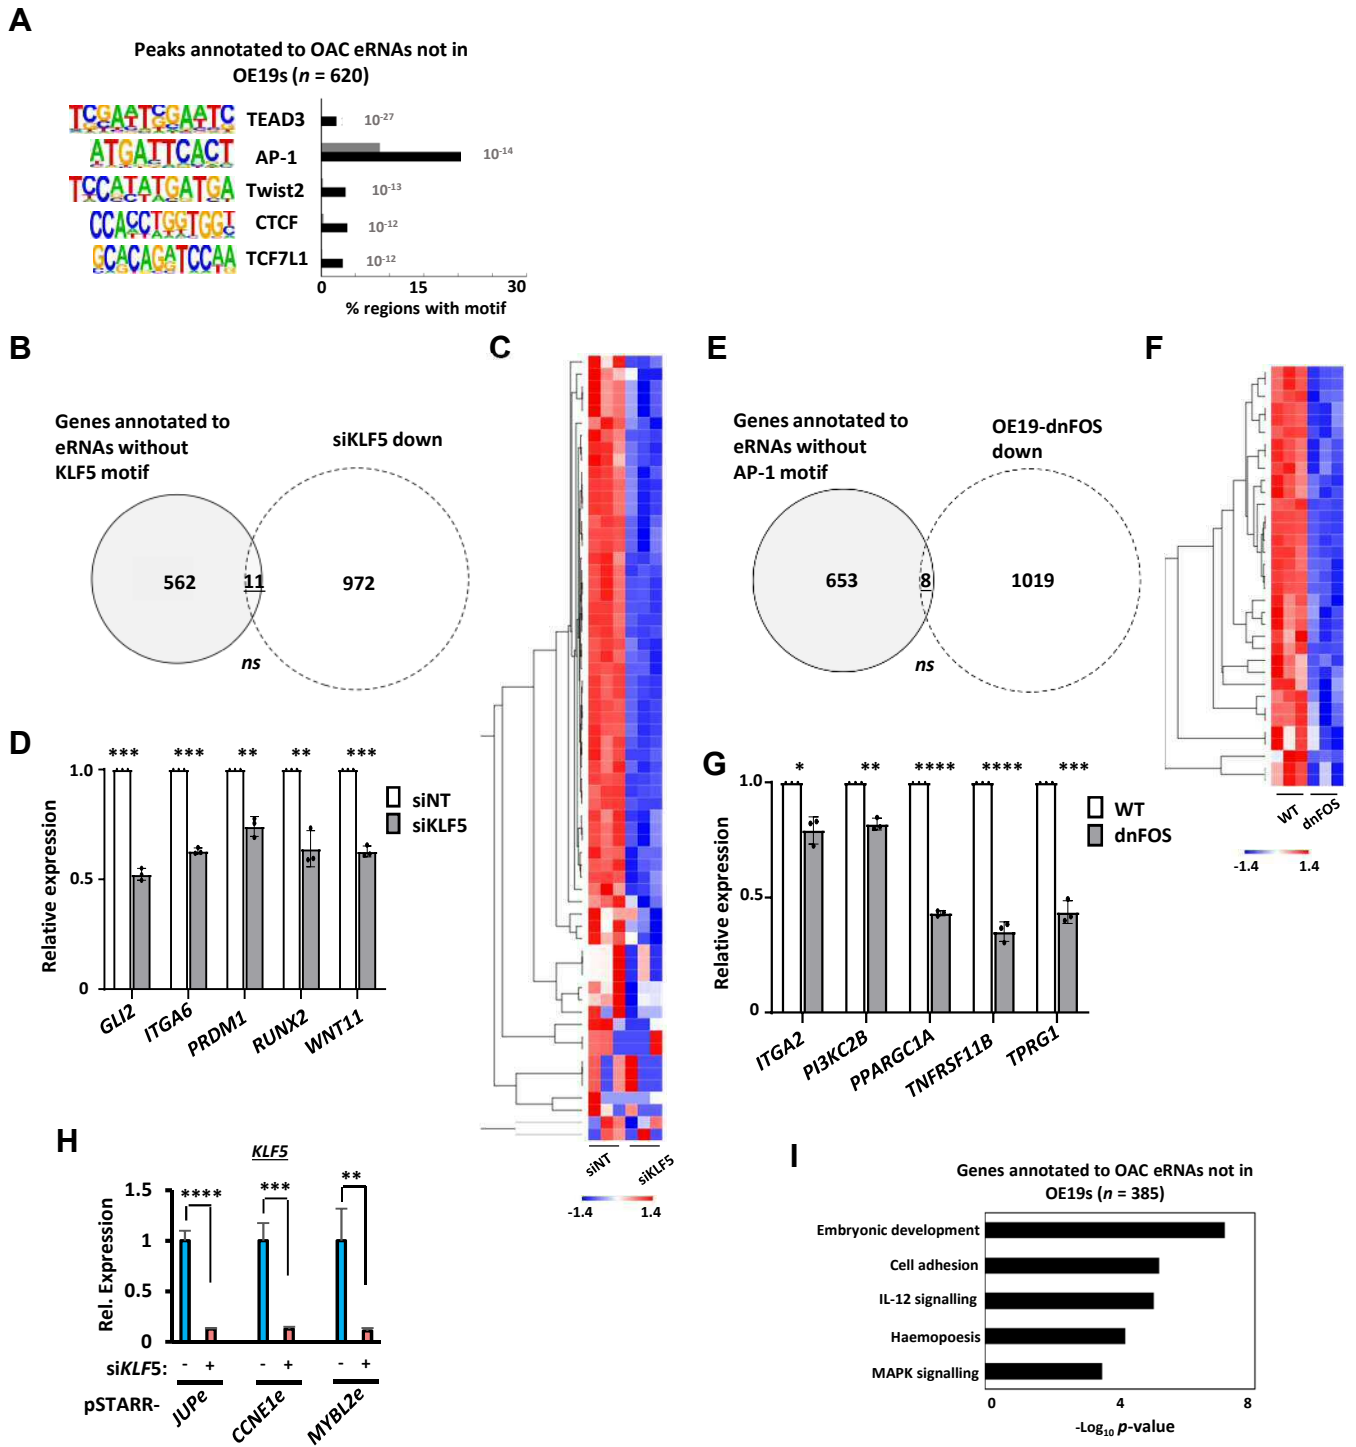

Supplement: supp [file elife-80840-supp-v1.zip]

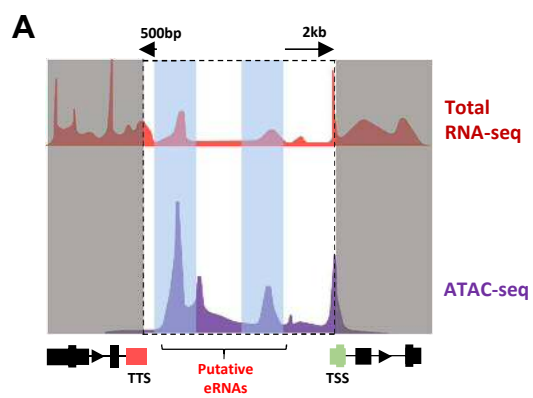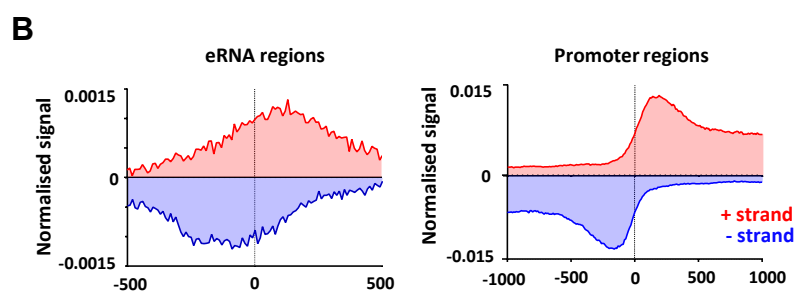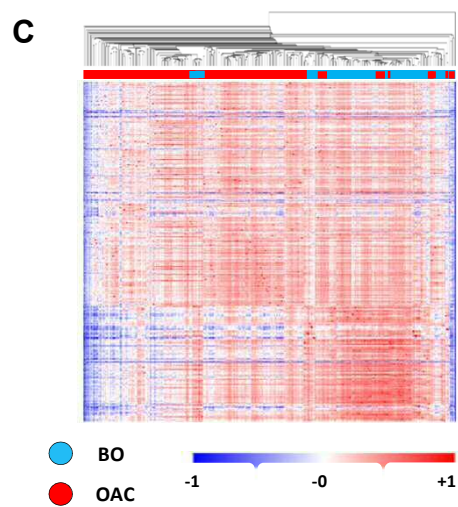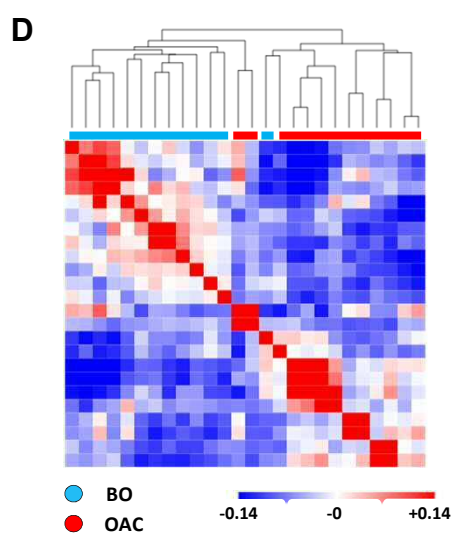

Supplement: supp [file elife-80840-supp-v1.zip]

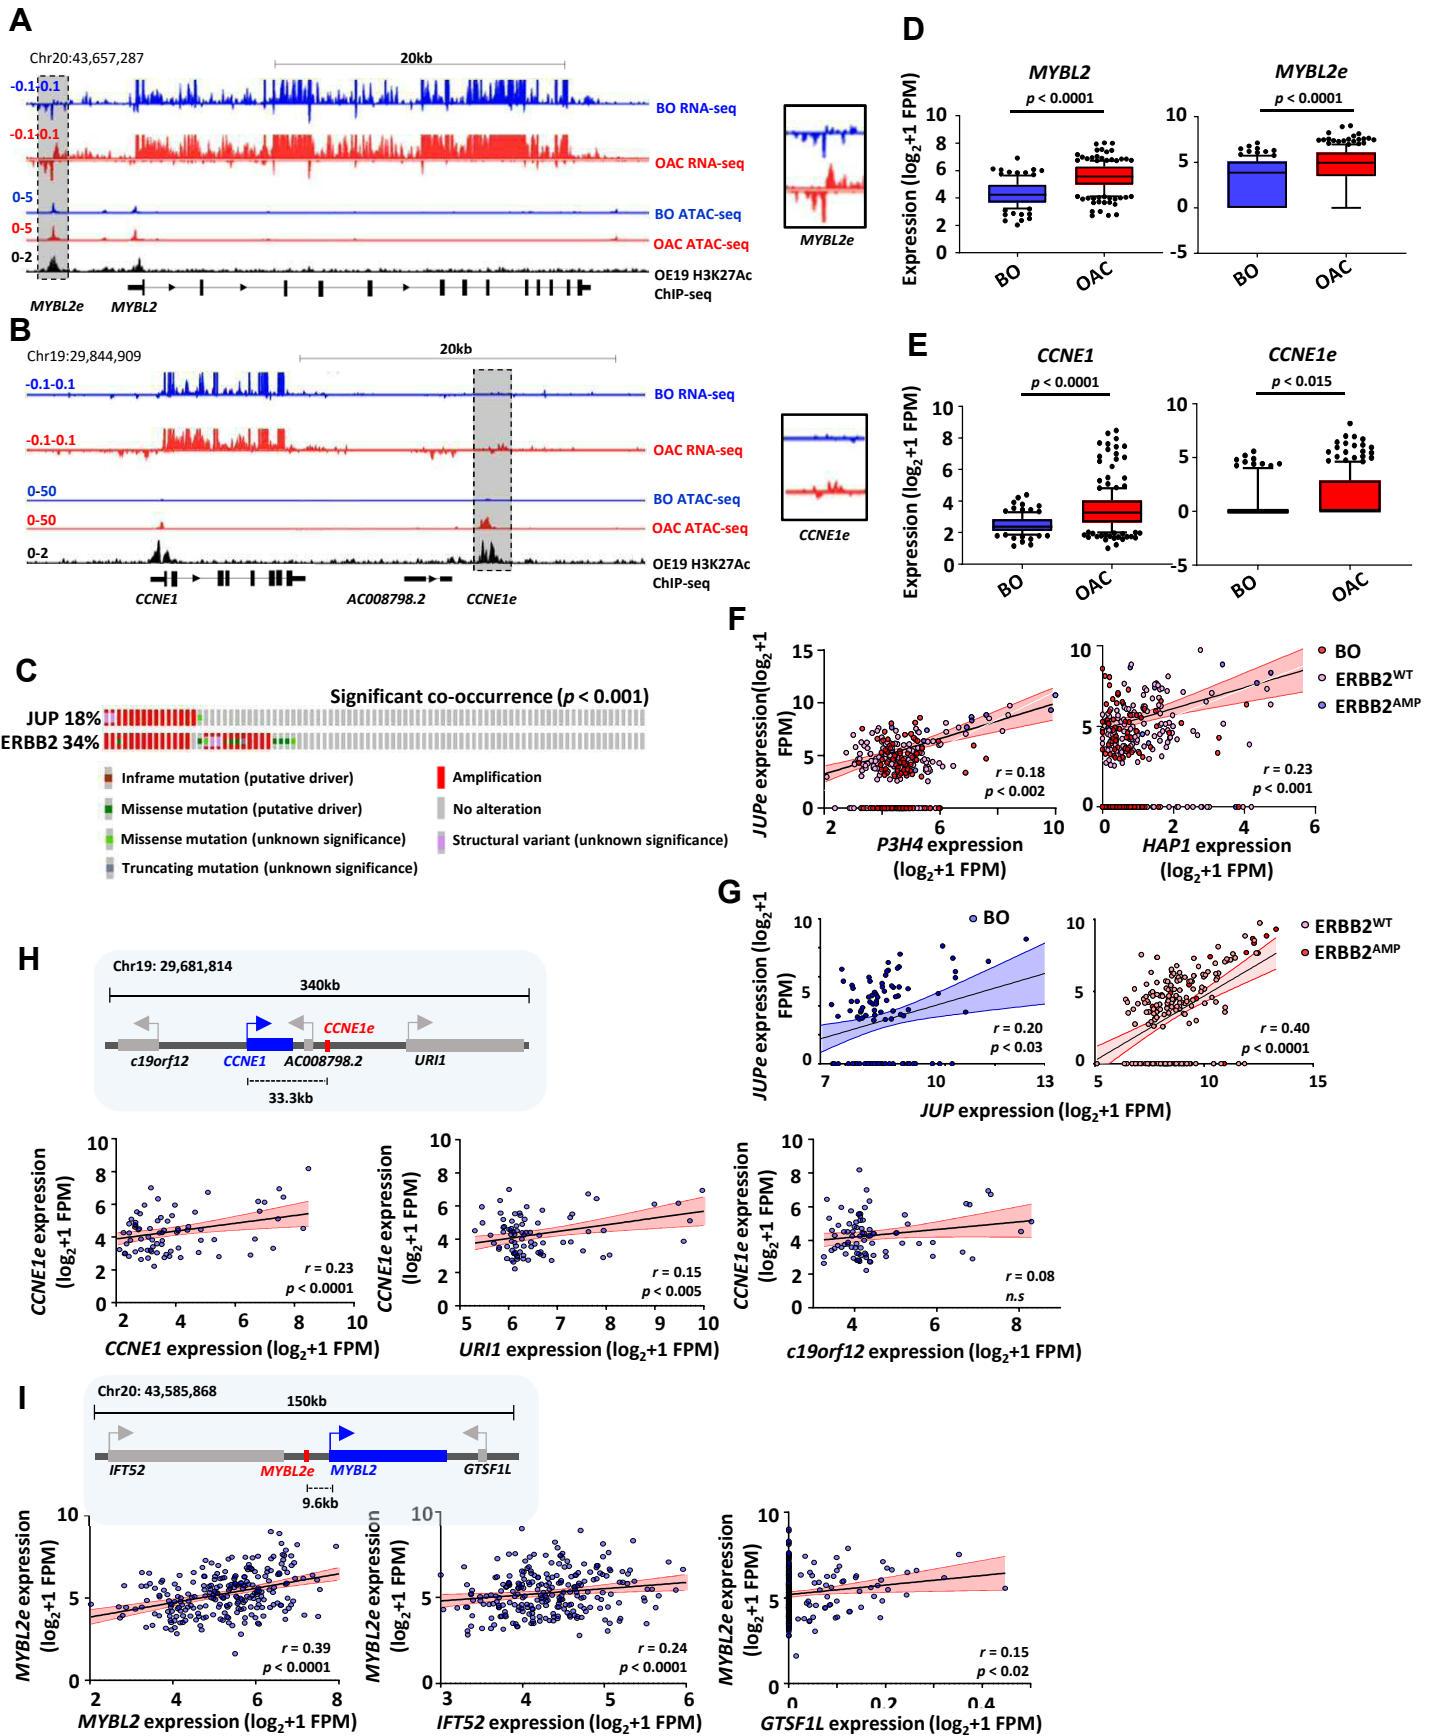

Supplement: supp [file elife-80840-supp-v1.zip]

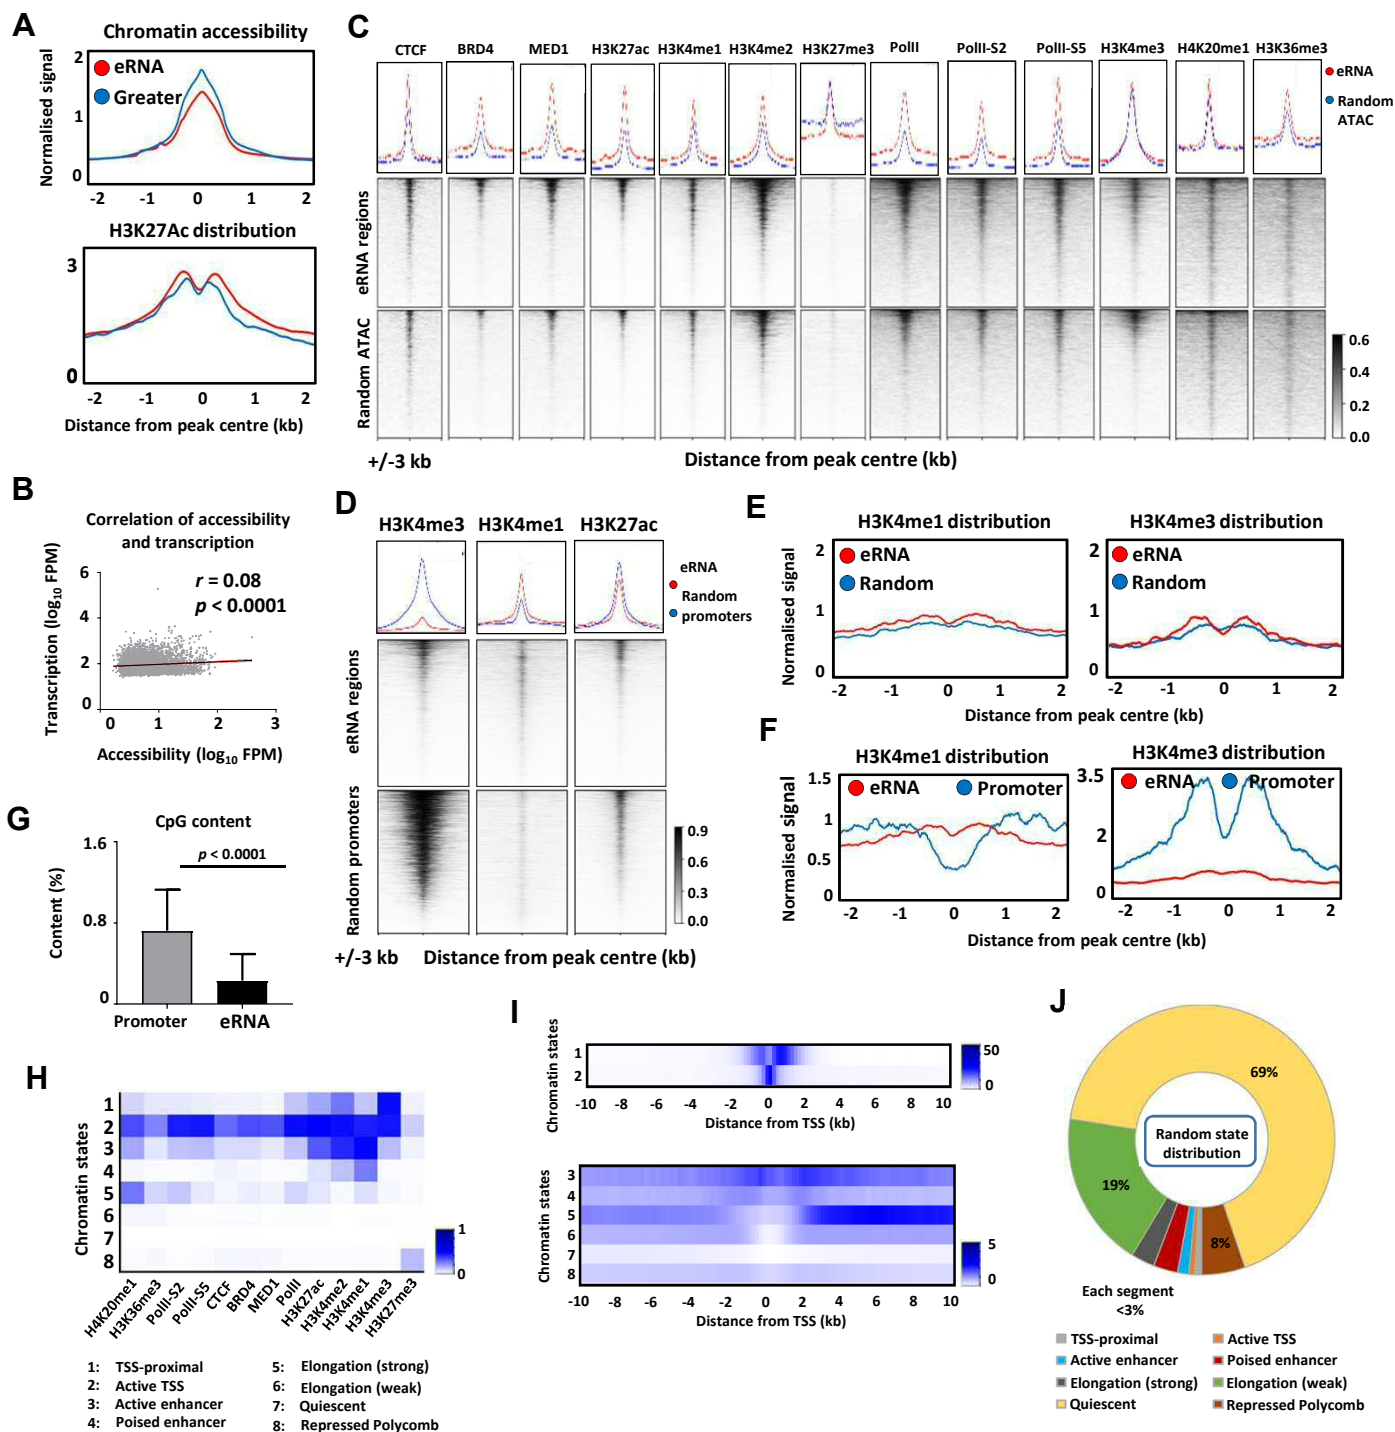

Supplement: supp [file elife-80840-supp-v1.zip]

**A**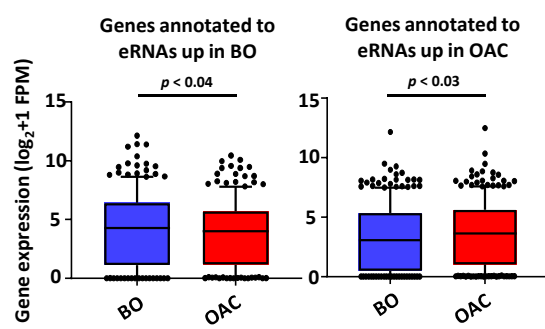**B**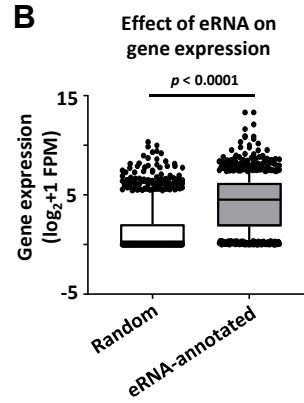

Supplement: supp [file elife-80840-supp-v1.zip]
